# Supplementary material for: N 2 O and N 2 losses from simulated injection of biogas digestate depend mainly on soil texture, moisture and temperature
Source: Copernicus journal article supplement (doi:10.5194/soil-2017-6), 2017-02-28
Supplement: Supplementary file [file soil-2017-6-AC4-supplement.pdf]

1 **Potential short-term losses of N<sub>2</sub>O and N<sub>2</sub> from high**  
2 **concentrations of biogas digestate depend mainly on soil**  
3 **texture and moisture, not on NH<sub>4</sub><sup>+</sup>**

4 Sebastian Rainer Fiedler<sup>1</sup>, Jürgen Augustin<sup>2</sup>, Nicole Wrage-Mönnig<sup>1</sup>, Gerald Jurasinski<sup>1</sup>,  
5 Bertram Gusovius<sup>2</sup>, Stephan Glatzel<sup>1,\*</sup>

6 <sup>1</sup>Faculty of Agricultural and Environmental Sciences, University of Rostock, Rostock, 18059, Germany

7 <sup>2</sup>Institute for Landscape Biogeochemistry, Leibniz Centre for Agriculture Landscape Research (ZALF) e.V.,  
8 Müncheberg, 15374, Germany

9 \*now at: Department of Geography and Regional Research, University of Vienna, Vienna, 1010, Austria

10 *Correspondence to:* S. R. Fiedler (sebastian.fiedler@uni-rostock.de)

11 **Abstract.** Biogas digestate (BD) is increasingly used as organic fertiliser, but has a high potential for NH<sub>3</sub>  
12 losses. Its proposed injection into soils as a counter-measure has been suggested to promote the generation of  
13 N<sub>2</sub>O, leading to a potential trade-off. Furthermore, the effect of high nutrient concentrations on N<sub>2</sub> losses as they  
14 may appear after injection of BD into soil has not yet been evaluated. Hence, we performed an incubation  
15 experiment with soil cores in a helium-oxygen atmosphere to examine the influence of soil substrate (loamy  
16 sand, clayey silt), water-filled pore space (WFPS; 35, 55, 75%) and application rate (0, 17.6 and 35.2 mL BD per  
17 soil core [250 cm<sup>3</sup>]) on the emissions of N<sub>2</sub>O, N<sub>2</sub> and CO<sub>2</sub> after the usage of high loads of BD. To determine the  
18 potential capacity for gaseous losses, we applied anaerobic conditions by purging with helium for the last 24 h of  
19 incubation. Immediate N<sub>2</sub>O and N<sub>2</sub> emissions as well as the N<sub>2</sub>/(N<sub>2</sub>O+N<sub>2</sub>) ratio depended on soil type and  
20 increased with WFPS indicating a crucial role of soil gas diffusivity for the formation of nitrogenous gases in  
21 agricultural soils. However, the emissions did not increase with the application rate of BD probably due to an  
22 inhibitory effect of the high NH<sub>4</sub><sup>+</sup> content in BD. Our results suggest a larger potential for N<sub>2</sub>O formation in the  
23 fine-textured clayey silt compared to the coarse loamy sand after applying high concentrations of BD as  
24 appearing after injection. However, the loamy sand showed basically a large potential for N<sub>2</sub> formation under  
25 anaerobic headspace conditions. Nevertheless, our results show the need for further investigations on the  
26 dynamics and the duration of the observed effects and their significance for field conditions.

## 27 1 Introduction

28 Nitrous oxide (N<sub>2</sub>O) is a potent greenhouse gas (Myhre et al., 2013), with agriculture being the largest single  
29 source of anthropogenic N<sub>2</sub>O emissions, contributing about 4.1 Tg N<sub>2</sub>O-N yr<sup>-1</sup> or 66% of total gross  
30 anthropogenic emissions mainly as a result of mineral nitrogen (N) fertiliser and manure application (Davidson  
31 and Kanter, 2014). The generation of nitrogen gas (N<sub>2</sub>) is of agronomic interest in terms of nutrient management,  
32 since such gaseous losses may imply a significant loss of N from the soil/plant system (Friedl et al., 2016;  
33 Cameron et al., 2013). However, from an environmental stance, N<sub>2</sub> is innocuous and, thus, the preferred type of  
34 gaseous N-loss from soil (Davidson et al., 2015). Further, emission of ammonia (NH<sub>3</sub>) is of environmental  
35 concern, e.g., due to acid deposition or conversion to N<sub>2</sub>O (Ferm, 1998; Mosier et al., 1998). In general, the  
36 improvement of N use efficiency and thus the decrease of N losses in crop production are paramount in the  
37 presence of challenges like food security, environmental degradation and climate change (Zhang et al., 2015).

38 In Germany, the increased demand for renewable energy sources like methane from biogas plants entails an  
39 expanded amount of digestion residues (biogas digestate, BD) used as organic amendment in agriculture (Möller  
40 and Müller, 2012). Digestion in biogas reactors increases pH and the proportion of ammonium ( $\text{NH}_4^+$ ) and  
41 narrows the C to N ratio due to the depletion of labile C fractions of the feedstock (Möller and Müller, 2012).  
42 Compared to undigested amendments like **animal** slurry, this altered chemical properties may promote  
43 biochemical reactions in the soil that are responsible for the formation of gaseous N species like  $\text{N}_2\text{O}$ , **nitric**  
44 **oxide (NO)**,  $\text{N}_2$  and especially  $\text{NH}_3$  (Nkoa, 2013). In general, the **effect strengths** of BD on gaseous N losses  
45 from soil is still under debate (Möller, 2015).

46 Significant losses of N as  $\text{NH}_3$  can occur within the first hours after manure application (Quakernack et al.,  
47 2012). To reduce  $\text{NH}_3$  losses, the application of BD by injection is recommended, **but** this measure can  
48 simultaneously increase the potential for  $\text{N}_2\text{O}$  losses compared to surface-application (Wulf et al., 2002; Velthof  
49 and Mosquera, 2011). **On the one hand, high  $\text{NH}_4^+$  concentrations in the injection band promote nitrification,**  
50 **which is a significantly  $\text{O}_2$  consuming process releasing  $\text{N}_2\text{O}$  (Christensen and Rowe, 1984). On the other hand,**  
51 **increased amounts of C in the injection band also promote respiration and, thus, additionally deplete the  $\text{O}_2$**   
52 **supply (Dell et al., 2011). Altogether, the** conditions during the initial phase after injection of BD foster  
53 microsites favourable for microbial denitrification, which may promote also the formation of  $\text{N}_2$  due to anaerobic  
54 conditions (Köster et al., 2015; Webb et al., 2010).

55 There is a wealth of biotic and abiotic processes in soils that produce  $\text{N}_2\text{O}$  and  $\text{N}_2$ , most of which are enhanced  
56 by anaerobic or at least hypo-aerobic conditions (Butterbach-Bahl et al., 2013). Also the amounts and the relative  
57 share of  $\text{N}_2$  and  $\text{N}_2\text{O}$  in the overall gaseous N emissions depend – among other factors like the favoured  
58 reduction of  $\text{NO}_3^-$  rather than  $\text{N}_2\text{O}$  as alternative electron acceptor – on the degree of  $\text{O}_2$  restriction (Firestone  
59 and Davidson, 1989). Soil physical and biotic factors (i.e. diffusion and consumption of  $\text{O}_2$ ) as well as their  
60 interactions control the aerobic status of a soil. Diffusion of  $\text{O}_2$  depends on the porosity of the soil substrate in  
61 conjunction with water-filled pore space (WFPS), while  $\text{O}_2$  is consumed by heterotrophic respiration **and**  
62 **nitrification** which depend on mineral N content, carbon (C) availability as well as on temperature (Ball, 2013;  
63 Uchida et al., 2008; Maag and Vinther, 1999). **In general, fine textured soils with higher clay contents exhibit a**  
64 **lower gas diffusivity compared to coarse textured soils, which result regularly in higher denitrification activity in**  
65 **the former with higher  $\text{N}_2\text{O}$  emission rates, but also a higher probability for the consecutive reduction to  $\text{N}_2$**   
66 **(Senbayram et al., 2014; Gu et al., 2013; Ball, 2013).** Simultaneously, the supply of substrates for  
67 microorganisms is determined by liquid diffusion rates in soil water and, thus, by WFPS (Blagodatsky and

68 Smith, 2012; Maag and Vinther, 1999). However, though high within injection bands, nutrient concentrations  
69 and WFPS should theoretically increase further with the row spacing between the injection bands, if a given  
70 amount of BD per area is assumed. We are not aware of studies addressing the effect of such high BD  
71 concentrations.

72 Hence, there is a general lack of knowledge about effects of BD injection on gaseous N-losses and especially  
73 about the effects of high BD concentrations and their interaction with O<sub>2</sub> limiting factors like soil texture and  
74 WFPS, as well as temperature and heterotrophic respiration. The indicated knowledge gaps are caused not the  
75 least by methodological constraints with the direct determination of N<sub>2</sub> fluxes due to the high background level of  
76 N<sub>2</sub> in the atmosphere, while indirect applications like acetylene-based methods and <sup>15</sup>N tracers are unfavourable  
77 since the former implicates serious underestimations and the latter has rather high detection limits (Groffman et  
78 al., 2006).

79 Thus, we applied the helium-oxygen (He-O<sub>2</sub>) incubation technique (Butterbach-Bahl et al., 2002) in a laboratory  
80 experiment to evaluate the effect of above suggested factors on the emission of N<sub>2</sub>O and N<sub>2</sub> after soil amendment  
81 with relatively high amounts of BD as they might occur after injection into soils. Simultaneously, CO<sub>2</sub> flux was  
82 determined as an indicator for microbial O<sub>2</sub> consumption, O<sub>2</sub> diffusion and also for the degradability of organic  
83 C applied with BD (Blagodatsky and Smith, 2012), but with the restriction that inorganic sources could not be  
84 differentiated. We hypothesised that (1) N<sub>2</sub>O and N<sub>2</sub> emissions will increase with WFPS, (2) this gaseous N  
85 losses will also be affected by BD application rate, i.e. the concentration resulting from injection, and (3) the fine  
86 textured clayey silt will induce higher gaseous N losses than the coarse loamy sand.

## 87 2 Material and Methods

### 88 2.1 Selected soils, sampling of soil cores and biogas digestate

89 Two soils were selected and both were adjusted to three levels of WFPS and three quantities of BD (Table 1),  
90 resulting in 18 factor combinations with three repetitions each. Temperature was increased from 2 °C during the  
91 first two days to 15 °C for the last three days of the incubation. Intact soil cores (diameter 7.2 cm, height 6.1 cm,  
92 volume 250 cm<sup>3</sup>) were taken with sample rings in the range from 0–0.10 m depth from two sites with different  
93 textures, i.e. sandy loam and clayey silt. The sandy loam samples were gathered from a stagnic luvisol (IUSS  
94 Working Group WRB, 2006) located in Gülzow (North-East Germany) in the ground moraine of the  
95 Weichselian glacial period at 53° 48' 35" N and 12° 4' 20" E. The clayey silt samples were collected from a

96 haplic luvisol located in Dornburg between the foothills and the lowlands of Central Germany at 51° 0' 8" N and  
97 11° 39' 25" E (see Table 2 for more details on soil characteristics). After field sampling, the soil cores were dried  
98 for 48 h at 40 °C to facilitate adjustment of WFPS.

99 Both sites have been cultivated with similar crop rotations used as feedstock for biogas production and have been  
100 amended with biogas digestate for the past nine years. The crop rotation on the sandy loam consisted of maize  
101 (*Zea mays* L.), rye (*Secale cereale* L.), sorghum (*Sorghum bicolor* (L.) MOENCH), winter triticale (×  
102 *Triticosecale* Wittmack), ryegrass (*Lolium perenne* L.) and winter wheat (*Triticum aestivum* L.). The only  
103 difference in the crop rotation on the clayey silt was the cultivation of sudangrass (*Sorghum × drummondii*)  
104 instead of sorghum.

105 The biogas digestate used for the incubation was obtained from a biogas plant at 'Gut Dalwitz', an organic farm  
106 in northeast Germany. The feedstock for the anaerobic fermentation in the plant consisted of 60 % maize, 20 %  
107 solid cattle manure, 10 % dry chicken manure and 10 % rye. The digestate was analysed by 'LUFA', Rostock,  
108 Germany and had a pH of 8.3, 2.91% organic C, 0.16% dissolved organic C (DOC), 0.54% N and 0.27% NH<sub>4</sub>-N  
109 in undried material with a dry matter content of 9.4%.

## 110 2.2 Adjustment of WFPS and addition of N

111 For adjustment of WFPS, the dry and undisturbed soil cores were moistened dropwise. The respective quantities  
112 of water were calculated based on the bulk density, an assumed particle density of 2.65 g cm<sup>-1</sup> and reduced by  
113 the expected moisture input from subsequent addition of BD. The soil cores were then mixed with BD and  
114 finally repacked to reach nutrient concentrations comparable to that in injection bands. The mixing was done for  
115 methodical reasons since the available space in the incubation vessels was limited and, hence, 'real' injection not  
116 feasible. However, injection bands have actually a thickness comparable to the sample rings we used (Markfoged  
117 et al., 2011). The amounts of added BD were calculated with an assumed injection of 160 kg N ha<sup>-1</sup> into soil with  
118 row spaces of 0.15 m (narrow injection bands with low BD concentration, LOBD) and 0.30 m (wide injection  
119 bands with high BD concentration, HIBD), which are common ranges used by injection machinery and which  
120 correspond to 17.6 and 25.3 mL BD, respectively, per sample ring. After this procedure, the soil cores were  
121 sealed with plastic lids and stored immediately at 2 °C until the beginning of the incubation within a week.

### 122 2.3 Determination of gas fluxes

123 The measurements of N<sub>2</sub>, N<sub>2</sub>O and CO<sub>2</sub> fluxes were applied following the He-O<sub>2</sub> method (Scholefield et al.,  
124 1997; Butterbach-Bahl et al., 2002). Six soil cores (i.e. the repetitions of two factor combinations at a time, Table  
125 3) were placed simultaneously in special gas-tight incubation vessels inside a climate chamber. Analyses were  
126 conducted in the laboratory of the Institute for Landscape Biogeochemistry, Leibniz Centre for Agricultural  
127 Landscape Research (ZALF), Müncheberg, Germany. Before flux measurements, the vessels were evacuated  
128 moderately (0.047 bar) and flushed with an artificial He/O<sub>2</sub> gas mixture (20.49 % O<sub>2</sub>, 345.5 ppm CO<sub>2</sub>, 359 ppb  
129 N<sub>2</sub>O, 1863 ppb CH<sub>4</sub>, 2.46 ppm N<sub>2</sub>, rest He) four times consecutively to remove ambient N<sub>2</sub>. Subsequently, the air  
130 temperature of the climate chamber was set to 2 °C and a continuous He/O<sub>2</sub> gas flow rate of 15 ml min<sup>-1</sup> was  
131 applied to the vessel headspaces for 72 h to remove residues of N<sub>2</sub> from soil cores **by diffusion, including a**  
132 **restricted N<sub>2</sub> production by decreased microbial activity**. After this pre-incubation, during the following two  
133 days, the headspace concentration of N<sub>2</sub>O and CO<sub>2</sub> was measured once daily in the morning. To compensate for  
134 **the lower precision of the detector for N<sub>2</sub> in relation to the detector for N<sub>2</sub>O and CO<sub>2</sub> (cf., Eickenscheidt et al.,**  
135 **2014)**, N<sub>2</sub> concentrations were measured consecutively three times daily in the morning. Immediately after the  
136 last measurement on the second day, the temperature was set to 15 °C and the measurements were continued for  
137 another two days. Finally, the He/O<sub>2</sub> gas mixture was substituted by pure He and, following 24 h of  
138 acclimatisation, gas measurements were carried out once again (Figure 1) to determine the **generation of N<sub>2</sub>O**  
139 **and N<sub>2</sub> in a completely anaerobic soil matrix. The latter step is important to get a clue about the actual potential**  
140 **for gaseous N losses after highly concentrated BD application**. The settings of the chromatographs for gas  
141 analyses are described in Eickenscheidt et al. (2014). Gas fluxes were calculated according to Eq. (1):

$$142 \quad f = \frac{M \times p \times v \times dc}{R \times T \times A}, \quad (1)$$

143 where  $f$  is the flux (N<sub>2</sub> and CO<sub>2</sub>: mg m<sup>-2</sup> h<sup>-1</sup>, N<sub>2</sub>O: µg m<sup>-2</sup> h<sup>-1</sup>),  $M$  the molar mass in g mol<sup>-1</sup> (N<sub>2</sub>: 28, CO<sub>2</sub>: 44,  
144 N<sub>2</sub>O: 44),  $p$  the air pressure (Pa),  $v$  the air flow (L h<sup>-1</sup>),  $R$  the gas constant (8.31 J mol<sup>-1</sup> K<sup>-1</sup>),  $T$  the temperature  
145 inside the chamber (K),  $A$  the area of the incubation vessel (m<sup>2</sup>), and  $dc$  the difference of gas concentrations (N<sub>2</sub>  
146 and CO<sub>2</sub>: ppm, N<sub>2</sub>O: ppb) **between inlet and outlet of a vessel**.

147 **To enhance the tightness against atmospheric N<sub>2</sub> contamination, the lids of the incubation vessels were purged**  
148 **permanently with helium. We obtained blank values by inserting aluminium blocks into the vessels before each**  
149 **measurement cycle. Since this blank values were usually steady with means of 1.9 (1σ = 0.9) ppm N<sub>2</sub>, 349.6 (1σ**

150 = 11.4) ppb N<sub>2</sub>O and 353.9 (1σ = 13.5) ppm CO<sub>2</sub>, we suggest that the vessels were tight. Derived from the blank  
151 values, lowest detectable fluxes were on average 0.427 (1σ = 0.271) mg N<sub>2</sub>-N m<sup>-2</sup> h<sup>-1</sup>, 3.6 (3.1) μg N<sub>2</sub>O-N m<sup>-2</sup> h<sup>-1</sup>  
152 and 0.918 (0.693) mg CO<sub>2</sub>-C m<sup>-2</sup> h<sup>-1</sup>. For flux estimation, the blank values were subtracted from the values  
153 measured at the respective outlet. Estimated fluxes from the soil cores smaller than the respective blank fluxes of  
154 each day were set to zero.

155

## 156 2.4 Soil analyses after incubation

157 After incubation, the soil cores were stored at 2 °C until they were extracted with 0.1 M KCl solution (soil to  
158 extract ratio 1:4, standardised extraction method of the commissioned laboratory at Leibniz Centre for  
159 Agricultural Landscape Research e. V.) and analysed for NH<sub>4</sub><sup>+</sup> and nitrate (NO<sub>3</sub><sup>-</sup>) by spectrophotometry  
160 according to DIN ISO 14256 with a continuous flow analyser 'CFA-SAN', Skalar Analytical B.V., the  
161 Netherlands and for DOC by combustion according to DIN ISO 10694 with an analyser 'RC 612', Leco  
162 Instruments GmbH, Germany.

## 163 2.5 Statistical analysis

164 All statistical analyses were done using R version 3.2.3 (R Core Team, 2015) with the data of the measuring  
165 days under He-O<sub>2</sub> atmosphere. Data from the vessels with the factor combination of 35% WFPS and LOBD with  
166 clayey silt were omitted due to technical reasons during sample preparation. For the final period of pure He  
167 headspace, some gas concentration data are missing due to logistical reasons. For the loamy sand, this affects all  
168 WFPS levels with LOBD (N<sub>2</sub> and N<sub>2</sub>O), the treatment 75% WFPS with 320 kg N h<sup>-1</sup> (N<sub>2</sub>O and CO<sub>2</sub>) and for the  
169 clayey silt the treatment 35% WFPS without amendment (N<sub>2</sub>O and CO<sub>2</sub>).

170 To account for repeated measurement of vessels, linear mixed effect models were applied with package  
171 'lmerTest' version 2.0-33 (Kuznetsova et al., 2016) for fluxes of each gas type. The three pseudo-replicated  
172 fluxes from the N<sub>2</sub> measurements of each vessel were averaged for each day to obtain the same number of  
173 observations as for N<sub>2</sub>O and CO<sub>2</sub> fluxes. The fixed structure of models included soil type, WFPS, amount of  
174 digestate, temperature, NO<sub>3</sub><sup>-</sup> and DOC contents after incubation as well as the fluxes of N<sub>2</sub>O (in the model for  
175 N<sub>2</sub>) and CO<sub>2</sub> (in the models for N<sub>2</sub>, N<sub>2</sub>O and N<sub>2</sub>/[N<sub>2</sub>+N<sub>2</sub>O] product ratio). Soil NH<sub>4</sub><sup>+</sup> was omitted since it showed  
176 high autocorrelation with the amount of BD applied. The individual soil cores in the vessels were set as random  
177 effect (nested within the week of incubation and with allowance for a variable slope of the effect each day) with

178 regard to lack of independence of consecutive measurements. The model responses for N<sub>2</sub>, N<sub>2</sub>O and CO<sub>2</sub> were  
179 log transformed (ln[value + 1]) since gas fluxes from soils usually show lognormal distributions (Kaiser et al.,  
180 1998). The function ‘step’ was used for automatic backward selection of models based on AIC (Akaike’s ‘An  
181 Information Criterion’). The skewness ( $\gamma$ ) was calculated with R package ‘moments’ version 0.14 (Komsta and  
182 Novomestky, 2015) to check residuals for normal distribution and  $|\gamma| \leq 2$  was assumed as appropriate (West et  
183 al., 1995). For mixed effects models, *p*-values of the ANOVA (type 2) were calculated based on Satterthwaite's  
184 approximation)  
185 Cumulated gas fluxes were estimated with a bootstrap method using function ‘auc.mc’ of R package ‘flux’  
186 version 0.3-0 (Jurasinski et al., 2014) for the R statistical software version 3.2.3 (R Core Team, 2015). In short,  
187 the fluxes for the period of aerobic headspace were cumulated in 100 iterations, while for each run 2 fluxes were  
188 omitted randomly. Then, the resulting data were used to calculate means and standard deviations.

### 189 3 Results

#### 190 3.1 Soil NH<sub>4</sub><sup>+</sup>, NO<sub>3</sub><sup>-</sup> and DOC contents

191 The calculated application of NH<sub>4</sub><sup>+</sup>-N from BD per kg soil approximated for the sandy loam 247.0 mg (LOBD)  
192 and 494.0 mg (HIBD), and for the clayey silt 266.0 mg (LOBD) and 532.0 mg (HIBD). The NO<sub>3</sub><sup>-</sup> content of BD  
193 was negligible. After incubation, the recovered NH<sub>4</sub><sup>+</sup>-N contents increased with the level of amendment with BD  
194 in both soils and were not affected by WFPS, with the exception of treatments of clayey silt with 35% WFPS  
195 (Fig. 2). In the loamy sand, the mean amounts of NH<sub>4</sub><sup>+</sup>-N per kg soil ranged from 8.5 to 10.0 mg (no  
196 amendment), from 170.4 to 185.6 mg (LOBD) and from 273.7 to 314.0 mg (HIBD). In the clayey silt, NH<sub>4</sub><sup>+</sup>-N  
197 contents per kg soil reached only 1.8 to 8.8 mg (no amendment), 89.7 to 98.9 mg (LOBD) and 146.8 to 194.0 mg  
198 (HIBD) and, thus, roughly half the amounts of the clayey silt. However, in contrast to the loamy sand, the clayey  
199 silt showed also substantial NO<sub>3</sub><sup>-</sup> contents between 25.7 (35% WFPS without amendment) and 49.8 mg NO<sub>3</sub><sup>-</sup>-N  
200 (kg soil)<sup>-1</sup> (55% WFPS with LOBD). Negligible amounts of NO<sub>3</sub><sup>-</sup> were detected in the loamy sand after  
201 incubation: except for a mean value of 2.4 mg NO<sub>3</sub><sup>-</sup>-N (kg soil)<sup>-1</sup> in the unamended treatment with 75% WFPS,  
202 the values of all other treatments ranged between 0.2 and 0.5 mg.

203 The amounts of recovered DOC increased with the application rate of BD, but with different magnitudes for both  
204 soils. While mean values from 38.6 (55 % WFPS without amendment) to 500.1 mg DOC per kg soil (75 %  
205 WFPS, HIBD) were determined for the loamy sand after incubation, lower mean values from 18.9 (55 % WFPS



206 without amendment) to 358.1 mg (35 % WFPS, HIBD) were found in the clayey silt, where the respective  
207 second highest values were considerably lower for both soils (loamy sand: 362.2 mg for 75 % WFPS with  
208 LOBD, clayey silt: 105.9 mg for 75 % WFPS with HIBD) (Table 4).

### 209 3.2 CO<sub>2</sub> fluxes

210 CO<sub>2</sub> fluxes showed clear differences between the soils: under all combinations of temperature and oxygen, the  
211 fluxes were always larger from the loamy sand compared with the clayey silt (Table A1). In general, the mean  
212 fluxes from the loamy sand increased with the amount of digestate from 8.3 to 57.6 (aerobic atmosphere at 2°C),  
213 from 34.0 to 168.7 (aerobic at 15 °C) and from 11.2 to 87.9 mg CO<sub>2</sub>-C m<sup>-2</sup> h<sup>-1</sup> (anaerobic at 15°C), but showed  
214 no obvious pattern with WFPS. Although the mean fluxes from the clayey silt were also always smallest in the  
215 unamended treatments, there was no clear trend of fluxes with the amount of amendment. There was a slight  
216 trend of decreasing fluxes with increasing WFPS for the clayey silt. However, the predictive power of WFPS on  
217 CO<sub>2</sub>-C fluxes was minor since it was eliminated during stepwise regression fitting. By contrast, soil type, amount  
218 of digestate, temperature as well as the DOC content after the incubation had significant ( $p < 0.01$ ) effects (Table  
219 5).

### 220 3.3 N<sub>2</sub>O fluxes

221 The mean N<sub>2</sub>O fluxes from the loamy sand at 2 °C under the He-O<sub>2</sub>-atmosphere were virtually zero and, thus,  
222 negligible (Fig. 3, Day 2 in Table A2). This was similar at 15°C with the exception of 35% WFPS without  
223 digestate (0.1 mg N<sub>2</sub>O-N m<sup>-2</sup> h<sup>-1</sup>, Fig. 3, Day 4 in Table A2). The clayey silt showed much larger fluxes than the  
224 loamy sand: even at 2 °C, up to 1.5 mg N<sub>2</sub>O-N m<sup>-2</sup> h<sup>-1</sup> were detected (55% WFPS with LOBD). After shifting the  
225 temperature to 15 °C, the same factor combination had a mean flux of 6.2 mg N<sub>2</sub>O-N m<sup>-2</sup> h<sup>-1</sup> and the other  
226 treatments emitted in mean between 1.0 and 3.0 mg N<sub>2</sub>O-N m<sup>-2</sup> h<sup>-1</sup> with the exception of incubations with 35%  
227 WFPS, where fluxes were smaller. The sand showed weak N<sub>2</sub>O emissions, independent of temperature and  
228 WFPS as well as the amount of BD application. In contrast, the emissions of the clayey silt increased with  
229 temperature and were highest with intermediate WFPS and amount of BD, i.e. 55% and LOBD, respectively.  
230 Surprisingly, at 15 °C, increasing the amount of BD up to HIBD did not increase the observed N<sub>2</sub>O efflux; rather  
231 it decreased the efflux significantly ( $p < 0.05$ , Tuckey's HSD) at 55% and also, but not significantly, at 75%  
232 WFPS (Fig. 3, Table A2). However, this effect was not noticed at 35% WFPS due to generally low emissions at  
233 this moisture level.

234 According to the linear mixed model for N<sub>2</sub>O fluxes in aerobic conditions, WFPS, amount of digestate,  
235 temperature, DOC content of soil after incubation and CO<sub>2</sub> fluxes had significant ( $p < 0.001$ ) effects on N<sub>2</sub>O flux  
236 (Table 5).

237 Under anaerobic headspace conditions, the overall highest mean N<sub>2</sub>O flux was observed from the clayey silt at  
238 35% WFPS and HIBD (11.7 mg N<sub>2</sub>O-N m<sup>-2</sup> h<sup>-1</sup>). The same soil showed a tendency of decreasing N<sub>2</sub>O fluxes  
239 with increasing WFPS. Fluxes were largest with LOBD amendment. In the loamy sand, the pure He-atmosphere  
240 induced increasing mean N<sub>2</sub>O fluxes (up to 1.3 mg N<sub>2</sub>O-N m<sup>-2</sup> h<sup>-1</sup>) with increasing WFPS (Fig. 3, Table A2). So,  
241 the anaerobic headspace induced a change only in the loamy sand by increasing emissions.

### 242 3.4 N<sub>2</sub> fluxes

243 From the loamy sand, no N<sub>2</sub> fluxes were detected at 2 °C under He-O<sub>2</sub>-atmosphere (Fig. 4, Day 2 in Table A3).  
244 Under the same conditions, the clayey silt showed mean fluxes from zero (all incubations with 35% WFPS) to  
245 1.4 mg N<sub>2</sub> m<sup>-2</sup> h<sup>-1</sup> (all incubations with 75% WFPS). After increasing the temperature to 15 °C, again, the sandy  
246 loam released mostly negligible **rates** of N<sub>2</sub>, except for 0.5 mg m<sup>-2</sup> h<sup>-1</sup> with 55% WFPS and 320 kg N ha<sup>-1</sup> (Fig. 4,  
247 Day 4 in Table A3). In contrast, up to 3.8 mg N<sub>2</sub> m<sup>-2</sup> h<sup>-1</sup> (75% WFPS with LOBD) were detected in the clayey  
248 silt. However, **the clayey silt showed** also no fluxes in all **BD treatments** with 35% WFPS. Put simply,  
249 temperature had a small effect on N<sub>2</sub> emissions from the sandy loam, but WFPS and amount of BD showed no  
250 consistent influence. In contrast, the clayey silt **emitted** clearly increasing emissions with increasing temperature,  
251 WFPS and also with the application of BD, where a raise from LOBD up to HIBD at 15 °C, however, resulted in  
252 slightly, but not significantly ( $p > 0.05$ , Tuckey's HSD), decreased fluxes (Fig. 4, Table A3). The summary of  
253 the linear mixed model for N<sub>2</sub> fluxes under aerobic conditions **revealed significant effects ( $p < 0.05$ ) of soil type,**  
254 **WFPS, the amount of digestate, temperature, DOC content after incubation and N<sub>2</sub>O flux** (Table 5).

255 After switching the atmosphere to pure He, the N<sub>2</sub> fluxes from the sandy loam increased more than 60-fold. In  
256 contrast to aerobic conditions, all measured factor combinations showed mean fluxes from 3.3 (35% WFPS  
257 without N) to 35.1 mg N<sub>2</sub> m<sup>-2</sup> h<sup>-1</sup> (55% with 320 kg N ha<sup>-1</sup>), where the fluxes from amended treatments were  
258 always higher than fluxes from the unamended ones (Fig. 2, Day 5 in Table A3). For the clayey silt, compared  
259 with aerobic atmosphere, mean fluxes increased slightly to 1.9 mg N<sub>2</sub> m<sup>-2</sup> h<sup>-1</sup> in unamended treatments and more  
260 remarkably to 9.3 mg N<sub>2</sub> m<sup>-2</sup> h<sup>-1</sup> in amended ones, still not reaching the amounts observed for the sandy loam.  
261 This implies that the N<sub>2</sub> emissions were increased from both soils under anaerobic headspace conditions, but the  
262 loamy sand exhibited a much more intense reaction.

### 263 3.5 $N_2/(N_2 + N_2O-N)$ product ratio

264 No clear trend of the product ratio of  $N_2/(N_2 + N_2O-N)$  was found for incubations of the loamy sand. However,  
265 there was a clear distinction of the ratios for this soil under aerobic and anaerobic atmospheres: while the ratios  
266 were close to zero in the former, they were close to 1 in the latter (Fig. 5). In contrast, in the clayey silt the ratios  
267 increased with WFPS and were affected by digestate amendment under both the aerobic and the anaerobic  
268 atmospheres, where the highest ratios (up to 0.8) were found in treatments without digestate and at least 55%  
269 WFPS. The digestate-amended treatments showed mostly ratios around or above 0.5, with exception of the 35%  
270 WFPS treatments, which had ratios close to zero. According to the linear mixed model, the product ratio under  
271 aerobic conditions was affected significantly ( $p < 0.01$ ) by soil type and the amount of digestate (Table 5).

## 272 4 Discussion

### 273 4.1 Increased BD application rate did not increase $N_2O$ and $N_2$ losses probably due to inhibitory effect 274 of high $NH_4^+$ concentrations

275 The overall  $N_2O$  fluxes corresponded well with those from other studies with similar incubation conditions and  
276 application rates of BD in terms of  $N\ ha^{-1}$  (Severin et al., 2015; Senbayram et al., 2012; Köster et al., 2015).  
277 However, the latter studies assumed a distribution of BD into soil by a cultivator, which implies a smaller  
278 concentration of BD compared to its occurrence in injection slits. Although we observed differences in  $N_2O$   
279 emissions between soils, soil type was not confirmed as a significant effect. Nevertheless, WFPS and  
280 temperature, which are well known controllers of  $N_2O$  generation (Maag and Vinther, 1999), showed significant  
281 influences. Both are physical (by gas diffusion) and biological (by increased metabolic activity and consequently  
282 increased  $O_2$  consumption by respiration) drivers for  $O_2$  availability, respectively (Maag and Vinther, 1999; Ball,  
283 2013). Accordingly, the  $CO_2$  flux (resulting from respiration of  $O_2$ ) generally increased with temperature and  
284 was also identified as significant by regression selection.

285 The mean  $N_2$  fluxes of up to 0.5 (loamy sand) and 3.8  $mg\ N\ m^{-2}\ h^{-1}$  (clayey silt) at 15° C (Fig. 5, Table A3) were  
286 considerably smaller than the mean fluxes of up to 13.0  $mg\ m^{-2}\ h^{-1}$  observed by Köster et al. (2015) during the  
287 first five days of their incubation. Although the amount of BD in terms of applied N (250  $kg\ ha^{-1}$ ) was  
288 comparable, Köster et al. (2015) used a higher WFPS of 90%, which may have increased the generation of  $N_2$ . In  
289 contrast to  $N_2O$  emission rates, the observed  $N_2$  fluxes depended not only on WFPS, but also on soil type (Table

290 5), most likely due to the direct influence of soil structure on diffusivity and, thus, the supply with O<sub>2</sub> (Balaine et  
291 al. 2016; Butterbach-Bahl et al. 2013). N<sub>2</sub>O flux showed also a significant effect during regression selection for  
292 N<sub>2</sub>. N<sub>2</sub>O is the direct precursor of N<sub>2</sub> in **denitrification** and, hence, the flux of the latter depends on the  
293 availability of the former. However, temperature showed no significant effect.

294 The N<sub>2</sub>/(N<sub>2</sub>+N<sub>2</sub>O) ratios were significantly determined only by soil type and WFPS: while no clear trend was  
295 observable for the loamy sand, there was a pronounced effect in the clayey silt (Fig 4). We attribute the lack of a  
296 trend in the loamy sand to generally adverse conditions for the formation of N<sub>2</sub>O and N<sub>2</sub>. Contrary, the influence  
297 of WFPS apparently mirrored favourable conditions in the clayey silt (Table 5). Simultaneously, with increasing  
298 WFPS, the reduction of N<sub>2</sub>O accelerates as an alternative electron acceptor under reduced O<sub>2</sub> supply (Tiedje,  
299 1988). **Accordingly**, no or rather small fluxes of the investigated gaseous N species were generally found in our  
300 **presumably well aerated** treatments with 35% WFPS.

301 In our study, one treatment (clayey silt, 55% WFPS, LOBD) showed exceptionally large mean N<sub>2</sub>O fluxes of up  
302 to 7.1 mg N m<sup>-2</sup> h<sup>-1</sup> (Fig. 3, Table A2). This could be evidence that injection of such **commonly applied amounts**  
303 **of BD-N (i.e., 160 kg N ha<sup>-1</sup>)** may favour much larger losses of N<sub>2</sub>O compared to an even distribution of BD in  
304 soils due to larger substrate concentration in injection slits. However, with higher amendments (i.e. HIBD), we  
305 observed surprisingly partially significant (*p* < 0.05, Tuckey's HSD) reductions of N<sub>2</sub>O and a decreasing  
306 tendency of N<sub>2</sub> emissions (Table A2, Table A3). In line with this, the amount of BD showed a significant effect  
307 during the regression selection on N<sub>2</sub>O, but not on N<sub>2</sub> fluxes (Table 5). A coherent reason for the rather smaller  
308 emissions of **highly** amended HIBD treatments might be the inhibitory effect of NH<sub>3</sub> on nitrification.  
309 **Accordingly**, Anthonisen et al. (1976) found an inhibition by concentrations from 0.1 to 150 mg NH<sub>3</sub> L<sup>-1</sup>. The  
310 application rate in the treatments with HIBD amounted to approximately 500 mg NH<sub>4</sub><sup>+</sup>-N (kg soil)<sup>-1</sup> (Fig. 3)  
311 **which correspond to 25.8 mg NH<sub>3</sub>-N (kg soil)<sup>-1</sup> at 15 °C if we use the pH of the BD and assume that all**  
312 **extractable NH<sub>4</sub><sup>+</sup>-N was in solution (Emerson et al., 1975). Hence**, we consider this inhibitory effect as **the**  
313 **reason** for the missing increase of N<sub>2</sub>O and N<sub>2</sub>. Additionally, the amount of NH<sub>4</sub><sup>+</sup> fixed as NH<sub>3</sub> by soil organic  
314 matter increases with pH and, moreover, this fixed NH<sub>3</sub> is not readily extractable by the KCl method we have  
315 applied (Kissel et al., 2008). This is consistent with the observation of generally higher N<sub>2</sub>O and N<sub>2</sub> fluxes from  
316 the clayey silt since clay increases the sorption capacity of soils for NH<sub>4</sub><sup>+</sup> and may, thus, reduce the inhibitory  
317 effect on nitrification (Kissel et al., 2008). **However, since we mixed the BD with the soil, we would expect a**  
318 **lower NH<sub>3</sub> fixation in tubular injection slits *in situ*, resulting in probably lower N<sub>2</sub>O and N<sub>2</sub> fluxes from clayey**  
319 **soils.**

320 An increasing application of BD tended also to decrease the  $N_2/(N_2+N_2O)$  ratio, but this effect was also not  
321 significant ( $p > 0.05$ , Tuckey's HSD). In general, nitrite ( $NO_2^-$ ) and  $NO_3^-$  are preferably reduced compared to  
322  $N_2O$  during denitrification sequence since the energy yield of each reduction step decreases from  $NO_3^-$  to  $N_2O$   
323 (Koike and Hattori, 1975). Additionally, the reaction rate of reduction is higher for  $NO_3^-$  and  $NO_2^-$  than for  $N_2O$ ,  
324 which results in an accumulation of  $N_2O$ , if  $NO_3^-$  or  $NO_2^-$  concentration is not limited (Betlach and Tiedje,  
325 1981). Hence, increasing application rates of BD increase the availability  $NO_2^-$  and  $NO_3^-$  from  $NH_4^+$  oxidation  
326 which, consequently, decreases  $N_2O$  reduction. However, in field situations, sooner or later an important fraction  
327 of this  $NH_4^+$  will be nitrified and can lead to further  $N_2O$  and  $N_2$  emissions if the WFPS is at sufficient levels.  
328 The inhibitory effect is in line with the strong influence of  $NO_3^-$  content of the soils after incubation (Table 5).  
329 Since  $NO_2^-$  oxidising bacteria are less resilient against high concentrations of  $NH_3$  than  $NH_3$  oxidising bacteria  
330 (Anthonisen et al., 1976), the accumulation of  $NO_2^-$  is likely. This  $NO_2^-$  protonates then partly to the toxic and  
331 unstable  $HNO_2$ , which drives biological and chemical production of  $NO$  and  $N_2O$  for detoxification (Venterea et  
332 al., 2015). Hence, we suggest a dominant role of denitrification, i.e.,  $NO_2^-$  reduction, in the generation of  $N_2O$   
333 during our experiment. Nevertheless, Indeed, coupled nitrification-denitrification and bacterial denitrification  
334 have been found to dominate the production of  $N_2O$  directly after application of BD (Köster et al., 2011;  
335 Senbayram et al., 2009). However,  $N_2O$ -N losses were clearly larger than  $N_2$  losses under aerobic headspace in  
336 the clayey silt, indicating that much of the N gas loss was driven by processes other than canonical  
337 denitrification. Under the above mentioned conditions,  $NO$ -N losses may exceed  $N_2O$  losses (Venterea et al.,  
338 2015), calling for taking account of  $NO$  measurements in future studies.  
339 Notably, in contrast to the clayey silt, no or negligible concentrations of  $NO_3^-$  were found in all treatments with  
340 loamy sand. Although we have not determined  $NO_2^-$ , it was certainly a substantial source for reduction by  
341 nitrifier denitrification in this soil, especially during the anaerobic headspace conditions at the end of the  
342 incubation. Actually, high  $NH_4^+$  loads in conjunction with alkaline conditions are typical for BD (Möller and  
343 Müller, 2012), which favour  $NO_2^-$  accumulation and may be the reason for the relatively small  $NO_3^-$  recovery in  
344 both soils (van Cleemput and Samater, 1995).

#### 345 4.2 Different effects of soil diffusivity on $N_2O$ and $N_2$ fluxes

346 Apparently, the tested factors affected the  $N_2O$  and  $N_2$  fluxes from both soils in a different way. A specific soil  
347 characteristic that exhibits such a fundamental control on biogeochemical processes such as denitrification is the  
348 diffusivity for  $O_2$  (Ball, 2013; Letey et al., 1980; Parkin and Tiedje, 1984), which is a main soil characteristic

349 responsible for the appearance of anaerobic microsites. In general, diffusivity integrates the soil porosity, i.e.,  
350 pore continuity and size as well as WFPS, which control both soil N<sub>2</sub>O and N<sub>2</sub> emissions (Balaine et al., 2016;  
351 Letey et al., 1980; Ball, 2013). Soils with a coarser texture like the loamy sand have a higher proportion of  
352 macro-pores and thus a higher gas diffusion compared with fine textured soils like the clayey silt we used  
353 (Groffman and Tiedje, 1991). This lets us expect conditions that are more favourable for N<sub>2</sub>O and N<sub>2</sub> generation  
354 in the latter due to **relatively poor** diffusion characteristics and, thus, a smaller O<sub>2</sub> supply. Actually, although we  
355 incubated the soils at comparable levels of WFPS and BD amendments, the apparent lower diffusivity led to  
356 larger N<sub>2</sub>O and N<sub>2</sub> production in the treatments with the clayey silt in relation to the loamy sand.

357 The role of the distinct diffusivities of both soils is corroborated by our observations of the gas fluxes in  
358 anaerobic headspace. With switching the He-O<sub>2</sub> atmosphere in the headspace to pure He, the denitrification  
359 potential can be tested because anaerobicity eliminates respiration processes that use O<sub>2</sub> as electron acceptor  
360 (Parkin and Tiedje, 1984). We acknowledge e.g. DNRA and anammox as possible additional sources of N<sub>2</sub>O and  
361 N<sub>2</sub>, respectively, under such conditions, but we were not able to quantify their contribution. The anaerobic  
362 headspace induced a considerable increase of N<sub>2</sub>O fluxes in the loamy sand, but not in the clayey silt.  
363 Concurrently, the N<sub>2</sub> fluxes increased in both soils, but pronounced, i.e. more than 60-fold, in the sandy loam.  
364 These observed changes resulting from oxygen deprivation imply that, during the previous aerobic conditions,  
365 the diffusivity of the sandy loam was too high to allow for a **sufficient** establishment of anaerobic microsites,  
366 while the clayey silt **ensured a moderate diffusional constraint** to maintain hypo-aerobic conditions. However,  
367 the large production rates indicate that also the loamy sand harboured the necessary microbial community able to  
368 generate N<sub>2</sub> as soon as the atmospheric conditions become favourable. In general, only N<sub>2</sub>O fluxes from  
369 treatments with negligible fluxes during the previous aerobic period increased under anaerobic conditions. This  
370 included all treatments with loamy sand and the highly amended clayey silt with 35% WFPS (Fig. 3, Table A2).  
371 At the same time, there was a reduction of N<sub>2</sub>O fluxes in all other clayey silt treatments. However, when we take  
372 a closer look at the simultaneous changes of N<sub>2</sub> fluxes after atmosphere change, virtually all of the respective  
373 treatments showed increased rates. Hence, there was an enhanced reduction of N<sub>2</sub>O to N<sub>2</sub>, which is reflected in  
374 the increased N<sub>2</sub>/(N<sub>2</sub> + N<sub>2</sub>O) ratio (Fig. 5) and points to intensified reduction of N<sub>2</sub>O due to the lack of oxygen  
375 (Parkin and Tiedje, 1984). The much larger N<sub>2</sub> fluxes from the loamy sand compared to the clayey silt might  
376 have been caused additionally by small NO<sub>3</sub><sup>-</sup> availability (Fig. 2) and a high availability of C (Table 4), which  
377 promoted the reduction of N<sub>2</sub>O to N<sub>2</sub> (**Senbayram et al., 2012**). Alternatively, the much smaller increase of N<sub>2</sub>  
378 fluxes from the clayey silt could have resulted from depleted mineral N stocks (NO<sub>3</sub><sup>-</sup> and NH<sub>4</sub><sup>+</sup>) due to the

379 previous gaseous N losses during the course of incubation. However, the cumulated fluxes of both N<sub>2</sub> and N<sub>2</sub>O  
380 amounted to a maximum absolute loss of 9.4 (1σ = 0.3) mg N per kg soil in the clayey silt with LOBD and 55%  
381 WFPS, which was roughly 3.5% of the calculated NH<sub>4</sub><sup>+</sup>-N applied with BD (Fig. 2). Thus, we found no evidence  
382 for any shortage of substrate in the clayey silt during the subsequent anaerobic headspace conditions. On the  
383 other hand, the N<sub>2</sub>/(N<sub>2</sub>+N<sub>2</sub>O) ratios increased only slightly (Fig. 5) and, in contrast to the loamy sand, there were  
384 still significant N<sub>2</sub>O fluxes in the clayey silt (Fig. 3), which point to still **sufficient** stocks of NO<sub>3</sub><sup>-</sup> in the latter  
385 (Senbayram et al., 2012). In fact, the NO<sub>3</sub><sup>-</sup> stock was greater in the clayey silt than in loamy sand after incubation  
386 (Fig. 2). Thus, we suggest that the gas fluxes were unaffected by the change to anaerobic headspace in the clayey  
387 silt due to already low O<sub>2</sub> concentrations as a result of poor diffusivity. In conclusion, distinct gas diffusivities  
388 of both soils can be **proposed** as the main reason for the differing N<sub>2</sub>O and N<sub>2</sub> fluxes.

389 In interaction with soil diffusivity, also respiration affects the aerobicity of a soil matrix by concurrent  
390 consumption and formation of O<sub>2</sub> and CO<sub>2</sub>, respectively. Similarly to N<sub>2</sub>O and N<sub>2</sub> generation by **denitrification**,  
391 respiration depends on the microbial availability of carbon as well. Although anaerobic digestion reduces readily  
392 degradable organic matter in BD, a 'labile' fraction usually remains, but the biodegradability of the respective  
393 residual organic carbon is variable, depending on the origin of BD (Askri et al., 2015). However, DOC could be  
394 used as an approximate indicator for microbial availability of carbon, though not all DOC might be readily  
395 degradable (Cook and Allan, 1992). Generally, the DOC contents after our incubation increased with application  
396 rate of BD (Table 4), but the DOC contents were always smaller in the clayey silt both in the not amended and  
397 especially in the amended treatments. This might reflect a stronger sorption of C and thus a lower availability for  
398 respiration in the clayey silt compared to the loamy sand (Kaiser and Guggenberger, 2000). If we compare the  
399 DOC recoveries with the cumulated flux rates of CO<sub>2</sub> over the **period of aerobic headspace**, we find a good  
400 regression fit ( $R^2 = 0.91$ ,  $p < 0.001$ ) for both soils (Fig. 6) indicating a sufficient availability of C from BD for  
401 respiration and, thus, implicitly also for denitrification (Reddy et al., 1982). Moreover, as increased DOC  
402 enhanced respiration (Table A1), it consequently affected O<sub>2</sub> consumption and, thus, also the emergence of  
403 anaerobic microsites (Azam et al., 2002). **Accordingly, there is also a good correlation between cumulated CO<sub>2</sub>**  
404 **and N<sub>2</sub>O + N<sub>2</sub> fluxes for the same period from the clayey silt ( $R^2 = 0.93$ ,  $p = 0.001$ ), when the treatments with 35**  
405 **% WFPS (which showed virtually no N emissions) are omitted (Fig. 7). However, there was no such a**  
406 **correlation for the loamy sand. This confirms the interactive effect of diffusivity (induced by both the soils and**  
407 **WFPS) and C availability on the emissions of N<sub>2</sub>O and N<sub>2</sub>.** Although CO<sub>2</sub> fluxes were mostly higher in the  
408 treatments with 320 kg compared to LOBD, this behaviour was not generally reflected in the **separate** emissions

409 of N<sub>2</sub>O and N<sub>2</sub> which might be a result of the inhibitory effect of high NH<sub>4</sub><sup>+</sup> loads on nitrification (see chapter  
410 4.1). However, the N<sub>2</sub>/(N<sub>2</sub>O+N<sub>2</sub>) ratios implied a tendency of N<sub>2</sub>O reduction due to a shortage of alternative  
411 electron acceptors like O<sub>2</sub> in the highly amended treatments. Additionally, **increasing** temperature influenced  
412 indirectly the aerobic status of the soils due to increased microbial activity and, hence, respiration (Maag and  
413 Vinther, 1999).

#### 414 **4.3 No indications for BD induced short-term priming effect**

415 We further checked for a short-term priming effect after amendment with BD as suggested recently by Coban et  
416 al. (2015). After balancing cumulated net CO<sub>2</sub>-C-fluxes (difference between amended and unamended  
417 treatments) against the calculated DOC-C application with BD for the period of aerobic headspace, we found no  
418 evidence for a short-term priming effect. In the loamy sand with LOBD, between 76% (35% WFPS) and 103%  
419 (75% WFPS) of the DOC-C had been respired (data not shown). In the respective treatments with 320 kg N ha<sup>-1</sup>,  
420 the CO<sub>2</sub>-C losses ranged from 47% (35% WFPS) to 76% (75% WFPS). By contrast, only between 11% (320 kg  
421 N ha<sup>-1</sup>) and 42% (LOBD) has been respired in the clayey silt (both at 55% WFPS). However, if one would  
422 consider the period after BD application for a longer time than we would, the light loamy sand may be  
423 vulnerable for C losses after BD application than the **cloggy** clayey silt.

#### 424 **5 Limitations**

425 Our study does not allow for conclusions about the long-term dynamics of N<sub>2</sub> and N<sub>2</sub>O emissions after BD  
426 application in concentrations similar to injection, since we have data for at most two days of static conditions in  
427 terms of temperature and headspace aerobicity. However, it should be emphasised that our aim was to estimate  
428 the effect of differing soil environmental conditions on gaseous N<sub>2</sub> losses. Generally, the initial phase, i.e., the  
429 first week after fertilizer application, is crucial for N<sub>2</sub>O emissions (Dobbie et al., 1999) and most probably also  
430 for N<sub>2</sub> because the same processes are involved. Köster et al. (2011; 2015) and Senbayram et al. (2009) observed  
431 in incubation experiments N<sub>2</sub>O peaks within the first and third day, which indicate a rather immediate reaction  
432 also for N<sub>2</sub> at least *in vitro*. Nevertheless, the former studies recorded a second plateau of N<sub>2</sub>O emission  
433 consistently after around two weeks, though, at very high WFPS. At a lower WFPS of 65%, Senbayram et al.  
434 (2009) measured only one peak within two days without a repeated increase later, regardless the amount of  
435 applied BD. Thus, we assume a single peak shortly after application holds also true for our incubation.  
436 Moreover, on the one hand, we observed no changes of N<sub>2</sub>O in the clayey silt under anaerobic headspace, which



437 suggest no further increase would have awaited if we had extended the incubation period with aerobic  
438 headspace. The increased N<sub>2</sub> emissions on the last day showed the potential, which would have arisen if the soil  
439 cores had been completely anaerobic. The latter has, however, no implications for mineral soils since such  
440 conditions are unlikely to occur *in situ*. On the other hand, the extremely increased N<sub>2</sub> emissions from the loamy  
441 sand on the last day verify that this soil permitted abundantly oxygen diffusion, which let us assume no  
442 appearances of possible second emission increases in the former aerobic headspace. We assume also the  
443 measurements after only 24 hours of anaerobicity in the headspace as representative for the emission potential  
444 since microbes associated with the production of N<sub>2</sub>O and N<sub>2</sub> in soils are able to react fast to changing  
445 environmental conditions by utilising existing enzymes within minutes or by *de novo* synthesis within 4 – 8  
446 hours (Rudaz et al., 1991). Wang et al. (2011; 2013) showed in similar studies to ours that the emission of N<sub>2</sub>  
447 and N<sub>2</sub>O peaked within less than 24 hours after switching their headspace from aerobic to anaerobic conditions,  
448 which emphasise our study design as appropriate.

## 449 **6 Conclusions**

450 As hypothesised, N<sub>2</sub>O and N<sub>2</sub> emissions as well as the N<sub>2</sub>/(N<sub>2</sub>O+N<sub>2</sub>) ratio increased with WFPS, most probably  
451 due to restricted supply of O<sub>2</sub>. Contrary to our second hypothesis, the gaseous losses of N<sub>2</sub>O and N<sub>2</sub> did not  
452 increase with the application rate of BD. This indicates an inhibitory effect of high NH<sub>3</sub> and NH<sub>4</sub><sup>+</sup>  
453 concentrations, respectively, on nitrification, which are found typically in biogas digestates (BD). However, the  
454 N<sub>2</sub>/(N<sub>2</sub>O+N<sub>2</sub>) ratio tended to decrease with application rate as supposed, probably due to a copious supply with  
455 NO<sub>2</sub><sup>-</sup> and NO<sub>3</sub><sup>-</sup> from oxidised BD-NH<sub>4</sub><sup>+</sup>. Confirming our third hypothesis, the fine textured clayey silt induced  
456 **larger** gaseous N losses and a higher N<sub>2</sub>/(N<sub>2</sub>O+N<sub>2</sub>) ratio than the coarse loamy sand by the apparent distinct  
457 diffusivities of both soils. Overall, there was a larger potential for formation of N<sub>2</sub>O in the fine-textured clayey  
458 silt compared to the coarse loamy sand **after applying high concentrations of BD as they may appear after**  
459 injection. However, the loamy sand showed a large potential for N<sub>2</sub> formation under anaerobic headspace  
460 conditions. Nevertheless, further investigations are needed in regarding **the dynamics and** the duration of the  
461 observed effects and their reliability for field conditions.

462 **Acknowledgements**

463 We thank three anonymous referees for their careful reading, critical comments and suggestions. We are very  
464 grateful to Heinrich Graf von Bassewitz and Matthias Haß from Gut Dalwitz for their straightforward support  
465 with substrate from their anaerobic digester. We thank Madlen Pohl from the ZALF, Institute for Landscape  
466 Biogeochemistry, Müncheberg, Germany, most sincerely for managing the laboratory analyses of the soil  
467 samples. The joint research project underlying this report was funded by the German Federal Ministry of Food  
468 and Agriculture under the funding identifier 22007910.

469

470 **References**

- 471 Anthonisen, A. C., Loehr, R. C., Prakasam, T. B. S., and Srinath, E. G.: Inhibition of Nitrification by Ammonia  
472 and Nitrous Acid, *Journal (Water Pollution Control Federation)*, 48, 835–852, 1976.
- 473 Askri, A., Laville, P., Trémier, A., and Houot, S.: Influence of Origin and Post-treatment on Greenhouse Gas  
474 Emissions After Anaerobic Digestate Application to Soil: Waste and Biomass Valorization, *Waste Biomass*  
475 *Valor*, 1–14, doi:10.1007/s12649-015-9452-6, 2015.
- 476 Azam, F., Müller, C., Weiske, A., Benckiser, G., and Ottow, J.: Nitrification and denitrification as sources of  
477 atmospheric nitrous oxide – role of oxidizable carbon and applied nitrogen, *Biology and Fertility of Soils*,  
478 35, 54–61, doi:10.1007/s00374-001-0441-5, 2002.
- 479 Balaine, N., Clough, T. J., Beare, M. H., Thomas, S. M., and Meenken, E. D.: Soil Gas Diffusivity Controls N<sub>2</sub>O  
480 and N<sub>2</sub> Emissions and their Ratio, *Soil Science Society of America Journal*, 80, 529–540,  
481 doi:10.2136/sssaj2015.09.0350, 2016.
- 482 Ball, B. C.: Soil structure and greenhouse gas emissions: a synthesis of 20 years of experimentation, *Eur J Soil*  
483 *Sci*, 64, 357–373, doi:10.1111/ejss.12013, 2013.
- 484 Betlach, M. R. and Tiedje, J. M.: Kinetic Explanation for Accumulation of Nitrite, Nitric Oxide, and Nitrous  
485 Oxide During Bacterial Denitrification, *Applied and Environmental Microbiology*, 42, 1074–1084, 1981.
- 486 Blagodatsky, S. and Smith, P.: Soil physics meets soil biology: Towards better mechanistic prediction of  
487 greenhouse gas emissions from soil, *Soil Biology and Biochemistry*, 47, 78–92,  
488 doi:10.1016/j.soilbio.2011.12.015, 2012.
- 489 Butterbach-Bahl, K., Baggs, E. M., Dannenmann, M., Kiese, R., and Zechmeister-Boltenstern, S.: Nitrous oxide  
490 emissions from soils: how well do we understand the processes and their controls?, *Philosophical*  
491 *Transactions of the Royal Society of London B: Biological Sciences*, 368, doi:10.1098/rstb.2013.0122,  
492 2013.
- 493 Butterbach-Bahl, K., Willibald, G., and Papen, H.: Soil core method for direct simultaneous determination of N<sub>2</sub>  
494 and N<sub>2</sub>O emissions from forest soils, *Plant and Soil*, 240, 105–116, doi:10.1023/A:1015870518723, 2002.
- 495 Cameron, K. C., Di, H. J., and Moir, J. L.: Nitrogen losses from the soil/plant system: a review, *Ann Appl Biol*,  
496 162, 145–173, doi:10.1111/aab.12014, 2013.
- 497 Christensen, J. P. and Rowe, G. T.: Nitrification and oxygen consumption in northwest Atlantic deep-sea  
498 sediments, *Journal of Marine Research*, 42, 1099–1116, doi:10.1357/002224084788520828, 1984.

499 Coban, H., Miltner, A., Elling, F. J., Hinrichs, K. U., and Kästner, M.: The contribution of biogas residues to soil  
500 organic matter formation and CO<sub>2</sub> emissions in an arable soil, *Soil Biology and Biochemistry*, 86, 108–115,  
501 doi:10.1016/j.soilbio.2015.03.023, 2015.

502 Cook, B. D. and Allan, D. L.: Dissolved organic carbon in old field soils: Total amounts as a measure of  
503 available resources for soil mineralization, *Soil Biology and Biochemistry*, 24, 585–594, doi:10.1016/0038-  
504 0717(92)90084-B, 1992.

505 Davidson, E. A. and Kanter, D.: Inventories and scenarios of nitrous oxide emissions, *Environmental Research*  
506 *Letters*, 9, 105012, 2014.

507 Davidson, E. A., Suddick, E. C., Rice, C. W., and Prokopy, L. S.: More Food, Low Pollution (Mo Fo Lo Po): A  
508 Grand Challenge for the 21st Century, *Journal of Environmental Quality*, 44, doi:10.2134/jeq2015.02.0078,  
509 2015.

510 Dell, C. J., Meisinger, J. J., and Beegle, D. B.: Subsurface Application of Manures Slurries for Conservation  
511 Tillage and Pasture Soils and Their Impact on the Nitrogen Balance, *Journal of Environmental Quality*, 40,  
512 doi:10.2134/jeq2010.0069, 2011.

513 Dobbie, K. E., McTaggart, I. P., and Smith, K. A.: Nitrous oxide emissions from intensive agricultural systems:  
514 Variations between crops and seasons, key driving variables, and mean emission factors, *J. Geophys. Res.*,  
515 104, 26891–26899, doi:10.1029/1999JD900378, 1999.

516 Eickenscheidt, T., Heinichen, J., Augustin, J., Freibauer, A., and Drösler, M.: Nitrogen mineralization and  
517 gaseous nitrogen losses from waterlogged and drained organic soils in a black alder (*Alnus glutinosa* (L.)  
518 Gaertn.) forest, *Biogeosciences*, 11, 2961–2976, doi:10.5194/bg-11-2961-2014, 2014.

519 Emerson, K., Russo, R. C., Lund, R. E., and Thurston, R. V.: Aqueous Ammonia Equilibrium Calculations:  
520 Effect of pH and Temperature, *Journal of the Fisheries Research Board of Canada*, 32, 2379–2383,  
521 doi:10.1139/f75-274, 1975.

522 Ferm, M.: Atmospheric ammonia and ammonium transport in Europe and critical loads: a review, *Nutrient*  
523 *Cycling in Agroecosystems*, 51, 5–17, doi:10.1023/A:1009780030477, 1998.

524 Firestone, M. K. and Davidson, E. A.: Microbiological basis of NO and N<sub>2</sub>O production and consumption in  
525 soil, in: *Exchange of Trace Gases Between Terrestrial Ecosystems and the Atmosphere*, Andreae, M. a. S. D.  
526 (Ed.), Wiley, Chichester, 7–21, 1989.

527 Friedl, J., Scheer, C., Rowlings, D. W., McIntosh, H. V., Strazzabosco, A., Warner, D. I., and Grace, P. R.:  
528 Denitrification losses from an intensively managed sub-tropical pasture – Impact of soil moisture on the  
529 partitioning of N<sub>2</sub> and N<sub>2</sub>O emissions, *Soil Biology and Biochemistry*, 92, 58–66,  
530 doi:10.1016/j.soilbio.2015.09.016, 2016.

531 Groffman, P. M., Altabet, M. A., Böhlke, J. K., Butterbach-Bahl, K., David, M. B., Firestone, M. K., Giblin, A.  
532 E., Kana, T. M., Nielsen, L. P., and Voytek, M. A.: Methods for measuring denitrification: diverse  
533 approaches to a difficult problem, *Ecological Applications*, 16, 2091–2122, doi:10.1890/1051-  
534 0761(2006)016[2091:MFMDDA]2.0.CO;2, 2006.

535 Groffman, P. M. and Tiedje, J. M.: Relationships between denitrification, CO<sub>2</sub> production and air-filled porosity  
536 in soils of different texture and drainage, *Soil Biology and Biochemistry*, 23, 299–302, doi:10.1016/0038-  
537 0717(91)90067-T, 1991.

538 Gu, J., Nicoullaud, B., Rochette, P., Gossel, A., Hénault, C., Cellier, P., and Richard, G.: A regional experiment  
539 suggests that soil texture is a major control of N<sub>2</sub>O emissions from tile-drained winter wheat fields during  
540 the fertilization period, *Soil Biology and Biochemistry*, 60, 134–141, doi:10.1016/j.soilbio.2013.01.029,  
541 2013.

542 Jurasinski, G., Koebsch, F., and Hagemann, U.: flux: Flux rate calculation from dynamic closed chamber  
543 measurements, 2014.

544 Kaiser, E. A., Kohrs, K., Kucke, M., Schnug, E., Heinemeyer, O., and Munch, J. C.: Nitrous oxide release from  
545 arable soil: Importance of N-fertilization, crops and temporal variation, *Soil Biology and Biochemistry*, 30,  
546 1553–1563, doi:10.1016/S0038-0717(98)00036-4, 1998.

547 Kaiser, K. and Guggenberger, G.: The role of DOM sorption to mineral surfaces in the preservation of organic  
548 matter in soils, *Organic Geochemistry*, 31, 711–725, doi:10.1016/S0146-6380(00)00046-2, 2000.

549 Kissel, D. E., Cabrera, M. L., and Paramasivam, S.: Ammonium, Ammonia, and Urea Reactions in Soils, in:  
550 Nitrogen in Agricultural Systems, *Agronomy Monographs*, American Society of Agronomy, Crop Science  
551 Society of America, Soil Science Society of America, Madison, WI, 101–155, 2008.

552 Koike, I. and Hattori, A.: Energy Yield of Denitrification: An Estimate from Growth Yield in Continuous  
553 Cultures of *Pseudomonas denitrificans* under Nitrate-, Nitrite- and Nitrous Oxide-limited Conditions,  
554 *Microbiology*, 88, 11–19, doi:10.1099/00221287-88-1-11, 1975.

555 Komsta, L. and Novomestky, F.: moments: Moments, cumulants, skewness, kurtosis and related tests, 2015.

556 Köster, J. R., Cárdenas, L., Senbayram, M., Bol, R., Well, R., Butler, M., Mühling, K. H., and Dittert, K.: Rapid  
557 shift from denitrification to nitrification in soil after biogas residue application as indicated by nitrous oxide  
558 isotopomers, *Soil Biology and Biochemistry*, 43, 1671–1677, doi:10.1016/j.soilbio.2011.04.004, 2011.

559 Köster, J. R., Cárdenas, L. M., Bol, R., Lewicka-Szczebak, D., Senbayram, M., Well, R., Giesemann, A., and  
560 Dittert, K.: Anaerobic digestates lower N<sub>2</sub>O emissions compared to cattle slurry by affecting rate and  
561 product stoichiometry of denitrification – An N<sub>2</sub>O isotopomer case study, *Soil Biology and Biochemistry*,  
562 84, 65–74, doi:10.1016/j.soilbio.2015.01.021, 2015.

563 Kuznetsova, A., Brockhoff, P. B., and Christensen, R. H. B.: lmerTest: Tests in Linear Mixed Effects Models,  
564 2016.

565 Letey, J., Jury, W. A., Hadas, A., and Valoras, N.: Gas Diffusion as a Factor in Laboratory Incubation Studies on  
566 Denitrification1, *Journal of Environmental Quality*, 9, doi:10.2134/jeq1980.00472425000900020012x,  
567 1980.

568 Maag, M. and Vinther, F. P.: Effect of temperature and water on gaseous emissions from soils treated with  
569 animal slurry, *Soil Science Society of America Journal*, 63, 858–865, 1999.

570 Markfoged, R., Nielsen, L. P., Nyord, T., Ottosen, L. D. M., and Revsbech, N. P.: Transient N<sub>2</sub>O accumulation  
571 and emission caused by O<sub>2</sub> depletion in soil after liquid manure injection, *Eur J Soil Sci*, 62, 541–550,  
572 doi:10.1111/j.1365-2389.2010.01345.x, 2011.

573 Möller, K.: Effects of anaerobic digestion on soil carbon and nitrogen turnover, N emissions, and soil biological  
574 activity. A review, *Agronomy for Sustainable Development*, 1–21, doi:10.1007/s13593-015-0284-3, 2015.

575 Möller, K. and Müller, T.: Effects of anaerobic digestion on digestate nutrient availability and crop growth: A  
576 review, *Eng. Life Sci.*, 12, 242–257, doi:10.1002/elsc.201100085, 2012.

577 Mosier, A., Kroeze, C., Nevison, C., Oenema, O., Seitzinger, S., and van Cleemput, O.: Closing the global  
578 N<sub>2</sub>O budget: nitrous oxide emissions through the agricultural nitrogen cycle - OECD/IPCC/IEA phase II  
579 development of IPCC guidelines for national greenhouse gas inventory methodology, *Nutrient Cycling in*  
580 *Agroecosystems*, 52, 225–248, doi:10.1023/A:1009740530221, 1998.

581 Myhre, G., Shindell, D., Bréon, F. M., Collins, W., Fuglestedt, J., Huang, J., Koch, D., Lamarque, J. F., Lee,  
582 D., and Mendoza, B.: Anthropogenic and natural radiative forcing, in: *Climate Change 2013: The Physical*  
583 *Science Basis: Contribution of Working Group I to the Fifth Assessment Report of the Intergovernmental*  
584 *Panel on Climate Change*, Stocker, T. F., Qin, D., Plattner, G. K., Tignor, M., Allen, S. K., Boschung, J.,  
585 Nauels, A., Xia, Y., Bex, V., and Midgley, P. M. (Eds.), Cambridge University Press, Cambridge, United  
586 Kingdom, New York, NY, USA, 659–740, 2013.

587 Nkoa, R.: Agricultural benefits and environmental risks of soil fertilization with anaerobic digestates: a review,  
588 *Agron. Sustain. Dev.*, 1–20, doi:10.1007/s13593-013-0196-z, 2013.

589 Parkin, T. B. and Tiedje, J. M.: Application of a soil core method to investigate the effect of oxygen  
590 concentration on denitrification, *Soil Biology and Biochemistry*, 16, 331–334, doi:10.1016/0038-  
591 0717(84)90027-0, 1984.

592 Quakernack, R., Pacholski, A., Techow, A., Herrmann, A., Taube, F., and Kage, H.: Ammonia volatilization and  
593 yield response of energy crops after fertilization with biogas residues in a coastal marsh of Northern  
594 Germany, *Agriculture, Ecosystems & Environment*, 160, 66–74, doi:10.1016/j.agee.2011.05.030, 2012.

595 R Core Team: R: A Language and Environment for Statistical Computing, Vienna, Austria: [https://www.R-](https://www.R-project.org/)  
596 [project.org/](https://www.R-project.org/), 2015.

597 Reddy, K. R., Rao, P. S. C., and Jessup, R. E.: The Effect of Carbon Mineralization on Denitrification Kinetics  
598 in Mineral and Organic Soils<sup>1</sup>, *Soil Science Society of America Journal*, 46, 62–68,  
599 doi:10.2136/sssaj1982.03615995004600010011x, 1982.

600 Rudaz, A. O., Davidson, E. A., and Firestone, M. K.: Sources of nitrous oxide production following wetting of  
601 dry soil, *FEMS Microbiology Letters*, 85, 117–124, doi:10.1111/j.1574-6968.1991.tb04703.x-i1, 1991.

602 Scholefield, D., Hawkins, J. M. B., and Jackson, S. M.: Development of a helium atmosphere soil incubation  
603 technique for direct measurement of nitrous oxide and dinitrogen fluxes during denitrification, *Soil Biology*  
604 *and Biochemistry*, 29, 1345–1352, doi:10.1016/S0038-0717(97)00021-7, 1997.

605 Senbayram, M., Chen, R., Budai, A., Bakken, L., and Dittert, K.: N<sub>2</sub>O emission and the N<sub>2</sub>O/(N<sub>2</sub>O + N<sub>2</sub>)  
606 product ratio of denitrification as controlled by available carbon substrates and nitrate concentrations,  
607 *Agriculture, Ecosystems & Environment*, 147, 4–12, doi:10.1016/j.agee.2011.06.022, 2012.

608 Senbayram, M., Chen, R., Mühling, K. H., and Dittert, K.: Contribution of nitrification and denitrification to  
609 nitrous oxide emissions from soils after application of biogas waste and other fertilizers, *Rapid Commun.*  
610 *Mass Spectrom.*, 23, 2489–2498, doi:10.1002/rcm.4067, 2009.

611 Senbayram, M., Chen, R., Wienforth, B., Herrmann, A., Kage, H., Mühling, K. H., and Dittert, K.: Emission of  
612 N<sub>2</sub>O from Biogas Crop Production Systems in Northern Germany, *BioEnergy Research*, 1–14,  
613 doi:10.1007/s12155-014-9456-2, 2014.

614 Severin, M., Fuss, R., Well, R., Garlipp, F., and van den Weghe, H.: Soil, slurry and application effects on  
615 greenhouse gas emissions, *Plant, Soil and Environment*, 61, 344–351, 2015.

616 Tiedje, J. M.: Ecology of denitrification and dissimilatory nitrate reduction to ammonium, in: *Biology of*  
617 *anaerobic microorganisms*, Zehnder, A. J. B. (Ed.), John Wiley and Sons Inc, New York, 179–244, 1988.

618 Uchida, Y., Clough, T. J., Kelliher, F. M., and Sherlock, R. R.: Effects of aggregate size, soil compaction, and  
619 bovine urine on N<sub>2</sub>O emissions from a pasture soil, *Soil Biology and Biochemistry*, 40, 924–931,  
620 doi:10.1016/j.soilbio.2007.11.007, 2008.

621 van Cleemput, O. and Samater, A. H.: Nitrite in soils: accumulation and role in the formation of gaseous N  
622 compounds, *Fertilizer research*, 45, 81–89, doi:10.1007/BF00749884, 1995.

623 Velthof, G. L. and Mosquera, J.: The impact of slurry application technique on nitrous oxide emission from  
624 agricultural soils, *Agriculture, Ecosystems & Environment*, 140, 298–308, doi:10.1016/j.agee.2010.12.017,  
625 2011.

626 Venterea, R. T., Clough, T. J., Coulter, J. A., Breuillin-Sessoms, F., Wang, P., and Sadowsky, M. J.: Ammonium  
627 sorption and ammonia inhibition of nitrite-oxidizing bacteria explain contrasting soil N<sub>2</sub>O production,  
628 *Scientific Reports*, 5, 12153 EP -, 2015.

629 Wang, R., Feng, Q., Liao, T., Zheng, X., Butterbach-Bahl, K., Zhang, W., and Jin, C.: Effects of nitrate  
630 concentration on the denitrification potential of a calcic cambisol and its fractions of N<sub>2</sub>, N<sub>2</sub>O and NO, *Plant*  
631 *and Soil*, 363, 175–189, doi:10.1007/s11104-012-1264-x, 2013.

632 Wang, R., Willibald, G., Feng, Q., Zheng, X., Liao, T., Brüggemann, N., and Butterbach-Bahl, K.: Measurement  
633 of N<sub>2</sub>, N<sub>2</sub>O, NO, and CO<sub>2</sub> Emissions from Soil with the Gas-Flow-Soil-Core Technique, *Environ. Sci.*  
634 *Technol.*, 45, 6066–6072, doi:10.1021/es1036578, 2011.

635 Webb, J., Pain, B., Bittman, S., and Morgan, J.: The impacts of manure application methods on emissions of  
636 ammonia, nitrous oxide and on crop response—A review, *Special section Harvested perennial grasslands:*  
637 *Ecological models for farming's perennial future*, 137, 39–46, doi:10.1016/j.agee.2010.01.001, 2010.

638 West, S. G., Finch, J. F., and Curran, P. J.: Structural equation models with nonnormal variables: Problems and  
639 remedies, in: *Structural equation modeling: Concepts, issues, and applications*, Hoyle, R. H. (Ed.), Sage,  
640 Thousand Oaks, 56–75, 1995.

641 Wulf, S., Maeting, M., and Clemens, J.: Application technique and slurry co-fermentation effects on ammonia,  
642 nitrous oxide, and methane emissions after spreading: II. Greenhouse gas emissions, *Journal of*  
643 *Environmental Quality*, 31, 1795–1801, 2002.

644 Zhang, X., Davidson, E. A., Mauzerall, D. L., Searchinger, T. D., Dumas, P., and Shen, Y.: Managing nitrogen  
645 for sustainable development, *NATURE*, 528, 51–59, 2015.

646

647 **Table 1: The examined factors soil texture, water-filled pore space (WFPS), and amount (i.e., concentration) of**  
 648 **nitrogen (N) applied with biogas digestate (BD) with their respective levels applied in the present study, resulting in**  
 649 **18 treatments with three replicates each. The temperature was manipulated consecutively during the incubation.**

| Factor [ <i>n</i> ]             | Levels     |             |     |
|---------------------------------|------------|-------------|-----|
| Soil texture [2]                | loamy sand | clayey silt |     |
| WFPS (%) [3]                    | 35         | 55          | 75  |
| BD-N (kg ha <sup>-1</sup> ) [3] | 0          | 160         | 320 |
| Temperature (°C) [2]            | 2          | 15          |     |

650

651 **Table 2: Characteristics of both soils. Texture and mean values with standard deviations (in brackets) for carbon (C,  $n = 9$ ), nitrogen (N,  $n = 9$ ), pH ( $n = 3$ ), bulk density (BD,  $n =$**   
 652 **3) and mineral N ( $\text{NO}_3^-$  and  $\text{NH}_4^+$ ,  $n = 3$ ) of both soils in 0–10 cm depth after field sampling.**

| Texture     | C ( $\text{mg g}^{-1}$ ) <sup>a</sup> | N ( $\text{mg g}^{-1}$ ) <sup>a</sup> | pH <sup>b</sup> | Bulk density ( $\text{g cm}^{-3}$ ) <sup>c</sup> | $\text{NO}_3^-$ ( $\text{mg kg}^{-1}$ ) <sup>d</sup> | $\text{NH}_4^+$ ( $\text{mg kg}^{-1}$ ) <sup>d</sup> |
|-------------|---------------------------------------|---------------------------------------|-----------------|--------------------------------------------------|------------------------------------------------------|------------------------------------------------------|
| Loamy sand  | 6.99 (0.29)                           | 0.67 (0.05)                           | 7.2 (0.1)       | 1.4 (0.0)                                        | 1.0 (0.2)                                            | 0.6 (0.3)                                            |
| Clayey silt | 10.77 (0.28)                          | 1.19 (0.06)                           | 7.2 (0.0)       | 1.5 (0.0)                                        | 1.8 (0.2)                                            | 0.3 (0.2)                                            |

653 <sup>a</sup> measured with analyser “Truspec CNS”, Leco Instruments GmbH, Germany, performed according to ISO 10694 (“elemental analysis”) for C and according to ISO

654 13878 (“elemental analysis”) for N

655 <sup>b</sup> measured in  $\text{H}_2\text{O}$  with TitraMaster85, Radiometer Analytical SAS, France, performed according to VDLUFA Methodenbuch, Vol. 1, chap. 5.1.1

656 <sup>c</sup> measured on 250  $\text{cm}^3$  soil cores

657 <sup>d</sup> measured with analyser “CFA-SAN”, Skalar Analytical B.V., the Netherlands, performed according to ISO 14256



658 **Table 3: Chronological order of the incubated factor combinations. Two different factor combinations with their**  
 659 **respective repetitions ( $n = 3$ ) were placed together for each weekly incubation course (cf. Fig. 1). The factors were**  
 660 **combined by (1) soil (loamy sand: LS, clayey silt: CS), (2) amount (kg) of applied N from digestate per ha and (3)**  
 661 **WFPS (%).**

| Week | Factor combination 1 | Factor combination 2 |
|------|----------------------|----------------------|
| 1    | LS - 0 N - 35%       | LS - 0 N - 55%       |
| 2    | LS - 0 N - 75%       | LS - 160 N - 35%     |
| 3    | LS - 160 N - 55%     | LS - 160 N - 75%     |
| 4    | LS - 320 N - 35%     | LS - 320 N - 55%     |
| 5    | LS - 320 N - 75%     | CS - 0 N - 35%       |
| 6    | CS - 0 N - 55%       | CS - 0 N - 75%       |
| 7    | CS - 160 N - 35%     | CS - 160 N - 55%     |
| 8    | CS - 160 N - 75%     | CS - 320 N - 35%     |
| 9    | CS - 320 N - 55%     | CS - 320 N - 75%     |

662

663 **Table 4: Mean recovered DOC values from soils after incubation with standard deviations in brackets for the**  
 664 **respective treatments differing in amount of applied biogas digestate (BD) and water-filled pore space (WFPS).**

| kg digestate-N ha <sup>-1</sup> | WFPS (%) | mg DOC (kg soil) <sup>-1</sup> |              |
|---------------------------------|----------|--------------------------------|--------------|
|                                 |          | Loamy sand                     | Clayey silt  |
| 0                               | 35       | 41.4 (2.7)                     | 18.9 (1.1)   |
|                                 | 55       | 38.6 (3.1)                     | 19.8 (1.4)   |
|                                 | 75       | 43.7 (1.4)                     | 19.0 (1.8)   |
| 160                             | 35       | 197.4 (20.7)                   | n.a.         |
|                                 | 55       | 190.5 (19.3)                   | 68.3 (12.7)  |
|                                 | 75       | 362.2 (40.0)                   | 63.2 (9.6)   |
| 320                             | 35       | 316.8 (25.3)                   | 358.1 (26.3) |
|                                 | 55       | 312.5 (14.3)                   | 94.8 (13.6)  |
|                                 | 75       | 500.1 (33.4)                   | 105.9 (14.8) |

665 n.a.: data not available

666 **Table 5: ANOVA table (type 2, *p*-values calculated based on Satterthwaite's approximation) of the linear mixed effects models for estimated fluxes of N<sub>2</sub>, N<sub>2</sub>O, N<sub>2</sub>/(N<sub>2</sub>+N<sub>2</sub>O)**  
 667 **product ratio and CO<sub>2</sub> in aerobic He-O<sub>2</sub> atmosphere. Soil type, water-filled pore space (WFPS), amount of digestate, temperature, NO<sub>3</sub><sup>-</sup> and DOC content of soil after incubation**  
 668 **as well as fluxes of N<sub>2</sub>O and CO<sub>2</sub> were set as possible independent variables. The individual soil rings were set as random effect (nested within the respective week and with the**  
 669 **allowance for varying slopes for each day of measurements). The random effect was always significant.**

670

| Response                                           | Fixed effects |         |                  |             |                                   |          |                       |                      |
|----------------------------------------------------|---------------|---------|------------------|-------------|-----------------------------------|----------|-----------------------|----------------------|
|                                                    | Soil type     | WFPS    | Digestate amount | Temperature | NO <sub>3</sub> <sup>-</sup> post | DOC post | N <sub>2</sub> O flux | CO <sub>2</sub> flux |
| N <sub>2</sub>                                     | 0.026         | < 0.001 | 0.008            | 0.037       | †                                 | 0.001    | < 0.001               | †                    |
| N <sub>2</sub> O                                   | †             | < 0.001 | < 0.001          | < 0.001     | †                                 | < 0.001  | *                     | < 0.001              |
| N <sub>2</sub> /(N <sub>2</sub> +N <sub>2</sub> O) | 0.005         | 0.004   | †                | †           | †                                 | †        | *                     | †                    |
| CO <sub>2</sub>                                    | <0.001        | †       | <0.001           | <0.001      | †                                 | 0.007    | †                     | *                    |

671 † Variable eliminated during stepwise regression selection

672 \* Variable was not included into original regression

673 **Figure 1: Course of incubation and gas measurements with respect to atmosphere and temperature of the headspace**  
674 **after two days of pre-incubation at 2 °C in He/O<sub>2</sub> gas mixture. Gas concentrations of the headspace were determined**  
675 **on five consecutive days, i.e. Monday to Friday in the morning. After the first two measurement days, the headspace**  
676 **temperature was increased from 2 to 15 °C. Additionally, after the fourth measurement day, the aerobic**  
677 **Helium/oxygen gas mixture in the headspace was replaced by a pure Helium atmosphere.**

678

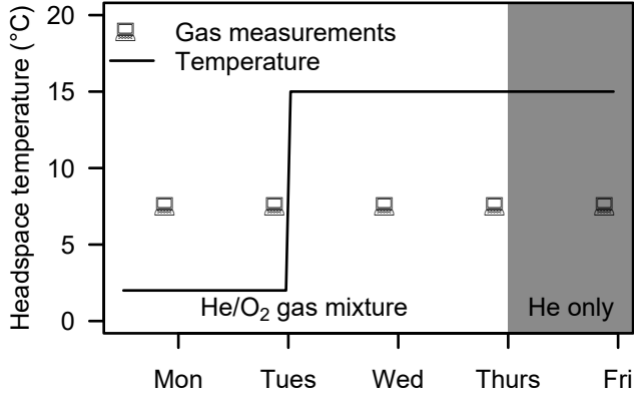

679 **Fig. 2: Ammonium and nitrate contents from loamy sand and clayey silt after incubation with different water-filled**  
680 **pore spaces (WFPS, %) and amounts of digestate (0 mL per sample ring: 'No BD', 17.6 mL: 'Low BD' and 35.2 mL:**  
681 **'High BD'). Error bars denote standard deviations. In general, the ammonium content increased with digestate**  
682 **application with lower amounts detected in the clayey silt. Nitrate was found almost exclusively in the latter soil. For**  
683 **comparison, calculated amounts of ammonium applied with biogas digestate are shown by triangles. One treatment**  
684 **(\*) was omitted from all analyses due to technical reasons.**

685

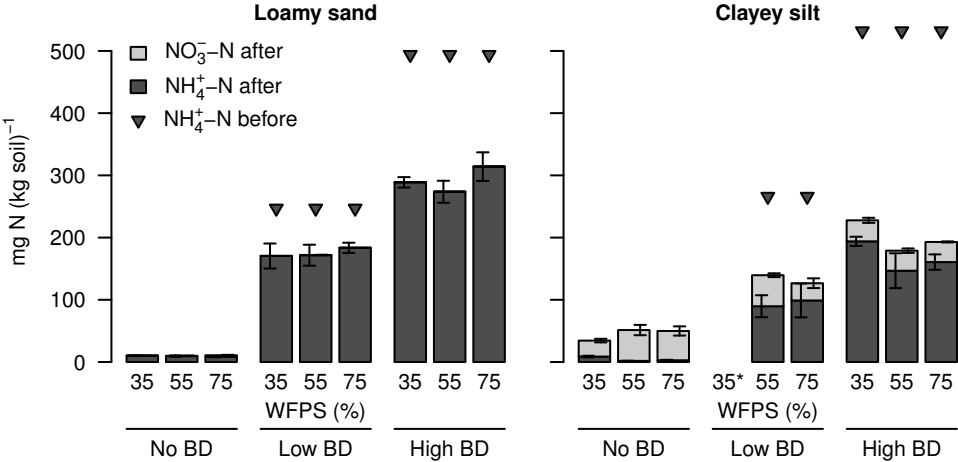

686 Fig. 3: Mean N<sub>2</sub>O fluxes (mg N m<sup>-2</sup> h<sup>-1</sup>) from a loamy sand and a clayey silt incubated under different water-filled pore  
687 spaces (WFPS, %) with different amounts of digestate (0 mL per sample ring: 'No BD', 17.6 mL: 'Low BD' and 35.2  
688 mL: 'High BD'). The first till the fourth day of the incubation were measured in an aerobic He-O<sub>2</sub> headspace (with  
689 two days at 2 °C followed by another two days at 15 °C) while on the fifth day measurements were conducted in an  
690 anaerobic headspace with pure He (at 15 °C). Error bars show standard deviations; if bars are not visible, they are  
691 smaller than the symbols of the means. Under aerobic atmosphere, N<sub>2</sub>O fluxes from loamy sand were negligible, while  
692 fluxes from clayey silt showed an increase with temperature, especially with higher WFPS and intermediate amounts  
693 of digestate. Under anaerobic atmosphere, mean fluxes from loamy sand increased slightly, but significantly (Tukey's  
694 HSD, *p* < 0.05). The fluxes from clayey silt showed no significant differences (Tukey's HSD, *p* < 0.05) compared to the  
695 day before, with the exception of 35% WFPS, where mean flux increased strongly in the treatment with 320 kg  
696 digestate-N ha<sup>-1</sup>.



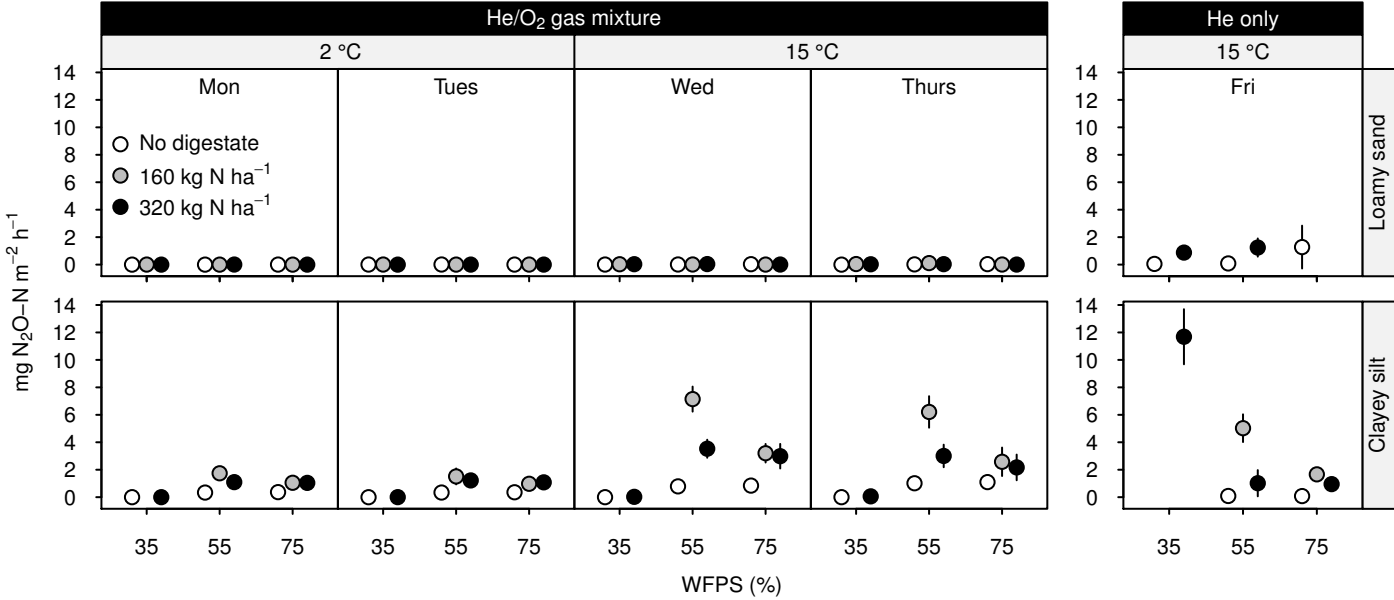

697 Fig. 4: Mean N<sub>2</sub> fluxes (mg m<sup>-2</sup> h<sup>-1</sup>) from a loamy sand and a clayey silt incubated under different water-filled pore  
698 spaces (WFPS, %) with different amounts of digestate (0 mL per sample ring: 'No BD', 17.6 mL: 'Low BD' and 35.2  
699 mL: 'High BD'). The first till the fourth day of the incubation were measured in an aerobic He-O<sub>2</sub> headspace (with  
700 two days at 2 °C followed by another two days at 15 °C) while on the fifth day measurements were conducted in an  
701 anaerobic headspace with pure He (at 15 °C). Error bars show standard deviations; if bars are not visible, they are  
702 smaller than the symbols of the means. The dotted horizontal lines depict the average blank value; single flux rates  
703 lower than the respective blank value were set zero. Under aerobic atmosphere, N<sub>2</sub> fluxes from loamy sand were zero  
704 or rather negligible, while fluxes from clayey silt show a distinct increase with WFPS and higher fluxes at 15 °C.  
705 Under anaerobic atmosphere, mean fluxes from loamy sand increased by orders of magnitude, while the fluxes from  
706 clayey silt increased as well, but more gently compared to the sand.

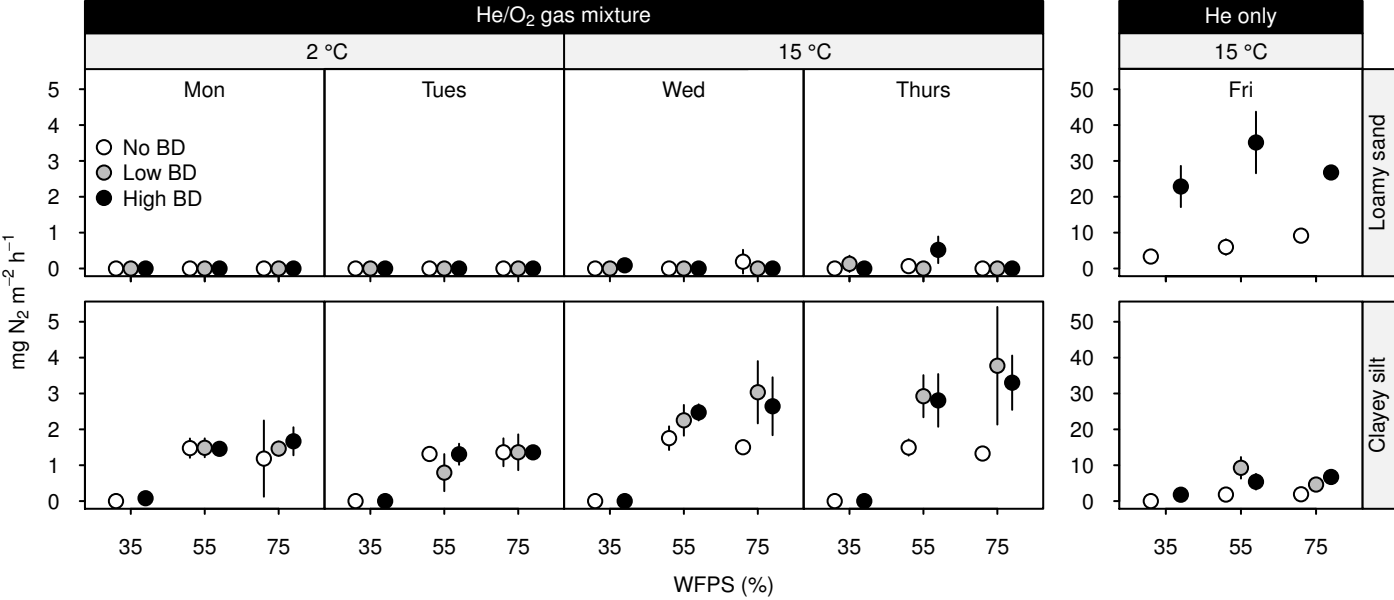

707 **Fig. 5: Mean  $N_2/(N_2 + N_2O-N)$  product ratio from a loamy sand and a clayey silt incubated under different water-filled**  
708 **pore spaces (WFPS, %) with different amounts of digestate (0 mL per sample ring: 'No BD', 17.6 mL: 'Low BD' and**  
709 **35.2 mL: 'High BD'). The first till the fourth day of the incubation were measured in an aerobic He-O<sub>2</sub> headspace**  
710 **(with two days at 2 °C followed by another two days at 15 °C) while on the fifth day measurements were conducted**  
711 **in an anaerobic headspace with pure He (at 15 °C). Error bars show standard deviations; if bars are not visible, they**  
712 **are smaller than the symbols of the means. For the loamy sand, there was a clear distinction of the ratios between**  
713 **aerobic and anaerobic atmospheres: while the ratios tended to 0 in the former, they tended to 1 in the latter,**  
714 **irrespectively of temperature or amount of digestate. For the clayey silt, ratios increased with WFPS and were highest**  
715 **from the unamended treatments under both the aerobic and the anaerobic atmospheres.**

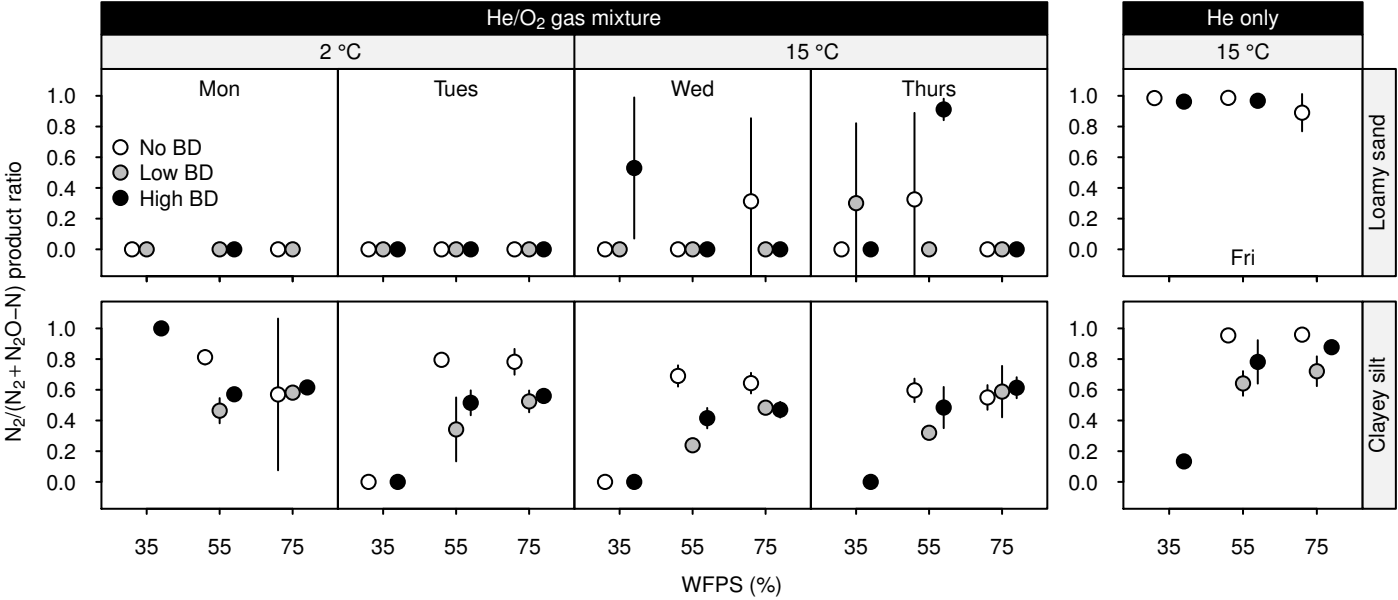

716 **Fig. 6: Regression between DOC recoveries (mg per 100 g soil) after the incubation and the respective cumulated CO<sub>2</sub>**  
717 **emissions (g C m<sup>-2</sup>) during the period of aerobic headspace with their standard deviations and confidence interval**  
718 **(95%). If error bars are not visible, they are smaller than the symbols of the means. Both soils showed increasing**  
719 **emissions with increasing soil DOC contents as well a good regression fit ( $R^2 = 0.91, p < 0.001$ ).**

720

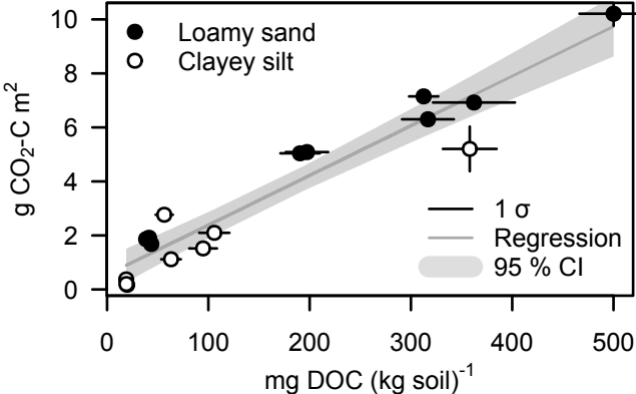

721 **Fig. 7: Regression between cumulated CO<sub>2</sub> emissions (g C m<sup>-2</sup>) and the respective cumulated N<sub>2</sub>O + N<sub>2</sub> emissions (g N**  
722 **m<sup>-2</sup>) from the clayey silt with WFPS > 35 % during the period of aerobic headspace with their standard deviations**  
723 **and confidence interval (95%). If error bars are not visible, they are smaller than the symbols of the means. The**  
724 **proportional increase of CO<sub>2</sub> and the N gas species shows a good regression fit of  $R^2 = 0.93$ , ( $p = 0.001$ ).**



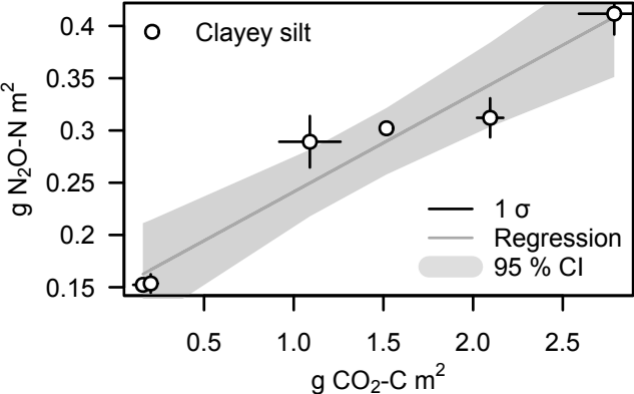

725 **Table A1: Mean CO<sub>2</sub>-C fluxes with standard deviations in mg m<sup>-2</sup> h<sup>-1</sup> from the loamy sand and the clayey silt, treated**  
726 **with different water-filled pore spaces (WFPS, %), amounts of digestate (kg N ha<sup>-1</sup>) as well as different temperature**  
727 **regimes (°C) under aerobic (He-O<sub>2</sub>) and anaerobic (He) atmosphere. Column 'Day' denotes the consecutive measuring**  
728 **days of the respective incubation cycle. Different letters after fluxes indicate significant differences (Tukey's HSD, *p* <**  
729 **0.05) within each soil and measuring day. Zeros as last digits were omitted.**

| Day | Atmosphere        | Temperature (°C) | WFPS (%) | kg N ha <sup>-1</sup> | mg CO <sub>2</sub> -C m <sup>-2</sup> h <sup>-1</sup> |                 |
|-----|-------------------|------------------|----------|-----------------------|-------------------------------------------------------|-----------------|
|     |                   |                  |          |                       | Loamy sand                                            | Clayey silt     |
| 1   | He-O <sub>2</sub> | 2                | 35       | 0                     | 6.8 ± 2.4 cd                                          | 0 ± 0 c         |
| 1   | He-O <sub>2</sub> | 2                | 35       | 160                   | 22 ± 3.5 bcd                                          | NA              |
| 1   | He-O <sub>2</sub> | 2                | 35       | 320                   | 23.3 ± 9.3 bc                                         | 22.8 ± 2.8 ab   |
| 1   | He-O <sub>2</sub> | 2                | 55       | 0                     | 6 ± 0.7 d                                             | 4.6 ± 7.9 bc    |
| 1   | He-O <sub>2</sub> | 2                | 55       | 160                   | 34.4 ± 3.1 b                                          | 34.5 ± 11.6 a   |
| 1   | He-O <sub>2</sub> | 2                | 55       | 320                   | 28 ± 3.2 b                                            | 15.9 ± 3.4 abc  |
| 1   | He-O <sub>2</sub> | 2                | 75       | 0                     | 9.4 ± 1.4 cd                                          | 0 ± 0 c         |
| 1   | He-O <sub>2</sub> | 2                | 75       | 160                   | 37.5 ± 6 b                                            | 15.5 ± 12.1 abc |
| 1   | He-O <sub>2</sub> | 2                | 75       | 320                   | 68.3 ± 12.1 a                                         | 24.5 ± 2.7 a    |
| 2   | He-O <sub>2</sub> | 2                | 35       | 0                     | 9.8 ± 3.5 c                                           | 1.3 ± 1.4 b     |
| 2   | He-O <sub>2</sub> | 2                | 35       | 160                   | 23 ± 3.9 bc                                           | NA              |
| 2   | He-O <sub>2</sub> | 2                | 35       | 320                   | 30.9 ± 2.2 b                                          | 22.2 ± 2.4 a    |
| 2   | He-O <sub>2</sub> | 2                | 55       | 0                     | 8.7 ± 1.5 c                                           | 0.6 ± 1 b       |
| 2   | He-O <sub>2</sub> | 2                | 55       | 160                   | 33.4 ± 0.9 b                                          | 27.6 ± 12.3 a   |
| 2   | He-O <sub>2</sub> | 2                | 55       | 320                   | 35.9 ± 2.7 b                                          | 14.4 ± 1.9 ab   |
| 2   | He-O <sub>2</sub> | 2                | 75       | 0                     | 8.3 ± 1.5 c                                           | 0 ± 0 b         |
| 2   | He-O <sub>2</sub> | 2                | 75       | 160                   | 31.9 ± 3 b                                            | 13 ± 9.3 ab     |
| 2   | He-O <sub>2</sub> | 2                | 75       | 320                   | 57.6 ± 14.8 a                                         | 18.3 ± 4 a      |
| 3   | He-O <sub>2</sub> | 15               | 35       | 0                     | 42.5 ± 4.5 c                                          | 6.7 ± 0.7 b     |
| 3   | He-O <sub>2</sub> | 15               | 35       | 160                   | 114.3 ± 12.2 b                                        | NA              |
| 3   | He-O <sub>2</sub> | 15               | 35       | 320                   | 149.5 ± 9.4 b                                         | 130.9 ± 105 a   |
| 3   | He-O <sub>2</sub> | 15               | 55       | 0                     | 41.3 ± 3.5 c                                          | 3.2 ± 0.4 b     |
| 3   | He-O <sub>2</sub> | 15               | 55       | 160                   | 108.7 ± 10.1 b                                        | 57.8 ± 12.2 bc  |
| 3   | He-O <sub>2</sub> | 15               | 55       | 320                   | 162.1 ± 9.6 b                                         | 26.8 ± 0.7 bc   |
| 3   | He-O <sub>2</sub> | 15               | 75       | 0                     | 44.1 ± 9.8 c                                          | 3.2 ± 0.7 b     |
| 3   | He-O <sub>2</sub> | 15               | 75       | 160                   | 150.4 ± 19 b                                          | 26.4 ± 11.8 bc  |
| 3   | He-O <sub>2</sub> | 15               | 75       | 320                   | 249.7 ± 53.5 a                                        | 35.3 ± 6 bc     |
| 4   | He-O <sub>2</sub> | 15               | 35       | 0                     | 48.7 ± 6 c                                            | 15.1 ± 4.9 cd   |
| 4   | He-O <sub>2</sub> | 15               | 35       | 160                   | 114.3 ± 6.4 b                                         | NA              |
| 4   | He-O <sub>2</sub> | 15               | 35       | 320                   | 156.9 ± 15.4 a                                        | 65.7 ± 2.2 a    |
| 4   | He-O <sub>2</sub> | 15               | 55       | 0                     | 48 ± 3.4 c                                            | 4.2 ± 0.2 d     |
| 4   | He-O <sub>2</sub> | 15               | 55       | 160                   | 109 ± 14.4 b                                          | 51.2 ± 15.1 ab  |
| 4   | He-O <sub>2</sub> | 15               | 55       | 320                   | 177.7 ± 7.5 a                                         | 26.6 ± 2.3 cd   |

|   |                   |    |    |     |                |                |
|---|-------------------|----|----|-----|----------------|----------------|
| 4 | He-O <sub>2</sub> | 15 | 75 | 0   | 34 ± 7.8 c     | 6.7 ± 4 d      |
| 4 | He-O <sub>2</sub> | 15 | 75 | 160 | 168.7 ± 0.4 a  | 22.1 ± 14.8 cd |
| 4 | He-O <sub>2</sub> | 15 | 75 | 320 | 166.3 ± 23.1 a | 34.1 ± 5.7 bc  |
| 5 | He                | 15 | 35 | 0   | 11.2 ± 0.6 d   | NA             |
| 5 | He                | 15 | 35 | 160 | 54.8 ± 9.3 c   | NA             |
| 5 | He                | 15 | 35 | 320 | 149.3 ± 3.9 a  | 45.8 ± 2.1 a   |
| 5 | He                | 15 | 55 | 0   | 13.6 ± 1.9 d   | 3.4 ± 0.6 c    |
| 5 | He                | 15 | 55 | 160 | 55.2 ± 4.4 bc  | 32 ± 11.4 ab   |
| 5 | He                | 15 | 55 | 320 | 164.5 ± 3.5 a  | 15.2 ± 10.7 bc |
| 5 | He                | 15 | 75 | 0   | 20.9 ± 2.3 d   | 3.6 ± 0.1 c    |
| 5 | He                | 15 | 75 | 160 | 75 ± 7.3 b     | 20.6 ± 8.5 bc  |
| 5 | He                | 15 | 75 | 320 | NA             | 26.1 ± 2.6 ab  |

730

731 **Table A2: Mean N<sub>2</sub>O-N fluxes with standard deviations in mg m<sup>-2</sup> h<sup>-1</sup> from the loamy sand and the clayey silt, treated**  
732 **with different water-filled pore spaces (WFPS, %), amounts of digestate (kg N ha<sup>-1</sup>) as well as different temperature**  
733 **regimes (°C) under aerobic (He-O<sub>2</sub>) and anaerobic (He) atmosphere. Column 'Day' denotes the consecutive measuring**  
734 **days of the respective incubation cycle. Different letters after fluxes indicate significant differences (Tukey's HSD, *p* <**  
735 **0.05) within each soil and measuring day. Zeros as last digits were omitted.**

| Day | Atmosphere        | Temperature<br>(°C) | WFPS (%) | kg N ha <sup>-1</sup> | mg N <sub>2</sub> O-N m <sup>-2</sup> h <sup>-1</sup> |              |
|-----|-------------------|---------------------|----------|-----------------------|-------------------------------------------------------|--------------|
|     |                   |                     |          |                       | Loamy sand                                            | Clayey silt  |
| 1   | He-O <sub>2</sub> | 2                   | 35       | 0                     | 0 ± 0                                                 | 0 ± 0 c      |
| 1   | He-O <sub>2</sub> | 2                   | 35       | 160                   | 0 ± 0                                                 | NA           |
| 1   | He-O <sub>2</sub> | 2                   | 35       | 320                   | 0 ± 0                                                 | 0 ± 0 c      |
| 1   | He-O <sub>2</sub> | 2                   | 55       | 0                     | 0 ± 0                                                 | 0.3 ± 0.1 c  |
| 1   | He-O <sub>2</sub> | 2                   | 55       | 160                   | 0 ± 0                                                 | 1.7 ± 0.4 a  |
| 1   | He-O <sub>2</sub> | 2                   | 55       | 320                   | 0 ± 0                                                 | 1.1 ± 0.1 b  |
| 1   | He-O <sub>2</sub> | 2                   | 75       | 0                     | 0 ± 0                                                 | 0.4 ± 0.1 c  |
| 1   | He-O <sub>2</sub> | 2                   | 75       | 160                   | 0 ± 0                                                 | 1 ± 0.1 b    |
| 1   | He-O <sub>2</sub> | 2                   | 75       | 320                   | 0 ± 0                                                 | 1 ± 0.2 b    |
| 2   | He-O <sub>2</sub> | 2                   | 35       | 0                     | 0 ± 0                                                 | 0 ± 0 d      |
| 2   | He-O <sub>2</sub> | 2                   | 35       | 160                   | 0 ± 0                                                 | NA           |
| 2   | He-O <sub>2</sub> | 2                   | 35       | 320                   | 0 ± 0                                                 | 0 ± 0 cd     |
| 2   | He-O <sub>2</sub> | 2                   | 55       | 0                     | 0 ± 0                                                 | 0.3 ± 0.1 bc |
| 2   | He-O <sub>2</sub> | 2                   | 55       | 160                   | 0 ± 0                                                 | 1.5 ± 0.6 a  |
| 2   | He-O <sub>2</sub> | 2                   | 55       | 320                   | 0 ± 0                                                 | 1.2 ± 0.2 a  |
| 2   | He-O <sub>2</sub> | 2                   | 75       | 0                     | 0 ± 0                                                 | 0.4 ± 0.1 bc |
| 2   | He-O <sub>2</sub> | 2                   | 75       | 160                   | 0 ± 0                                                 | 1 ± 0.1 ab   |
| 2   | He-O <sub>2</sub> | 2                   | 75       | 320                   | 0 ± 0                                                 | 1.1 ± 0.2 a  |
| 3   | He-O <sub>2</sub> | 15                  | 35       | 0                     | 0 ± 0 cd                                              | 0 ± 0 c      |
| 3   | He-O <sub>2</sub> | 15                  | 35       | 160                   | 0 ± 0 abc                                             | NA           |
| 3   | He-O <sub>2</sub> | 15                  | 35       | 320                   | 0 ± 0 ab                                              | 0 ± 0 c      |
| 3   | He-O <sub>2</sub> | 15                  | 55       | 0                     | 0 ± 0 bcd                                             | 0.8 ± 0.2 c  |
| 3   | He-O <sub>2</sub> | 15                  | 55       | 160                   | 0 ± 0 bcd                                             | 7.1 ± 0.9 a  |
| 3   | He-O <sub>2</sub> | 15                  | 55       | 320                   | 0 ± 0 a                                               | 3.5 ± 0.7 b  |
| 3   | He-O <sub>2</sub> | 15                  | 75       | 0                     | 0 ± 0 ab                                              | 0.8 ± 0.2 c  |
| 3   | He-O <sub>2</sub> | 15                  | 75       | 160                   | 0 ± 0 d                                               | 3.2 ± 0.7 b  |
| 3   | He-O <sub>2</sub> | 15                  | 75       | 320                   | 0 ± 0 cd                                              | 3 ± 0.9 b    |
| 4   | He-O <sub>2</sub> | 15                  | 35       | 0                     | 0 ± 0 b                                               | 0 ± 0 c      |
| 4   | He-O <sub>2</sub> | 15                  | 35       | 160                   | 0 ± 0 ab                                              | NA           |
| 4   | He-O <sub>2</sub> | 15                  | 35       | 320                   | 0 ± 0 ab                                              | 0.1 ± 0.1 c  |
| 4   | He-O <sub>2</sub> | 15                  | 55       | 0                     | 0 ± 0 b                                               | 1 ± 0.2 bc   |
| 4   | He-O <sub>2</sub> | 15                  | 55       | 160                   | 0.1 ± 0.1 a                                           | 6.2 ± 1.1 a  |
| 4   | He-O <sub>2</sub> | 15                  | 55       | 320                   | 0 ± 0 ab                                              | 3 ± 0.8 b    |

|   |                   |    |    |     |           |              |
|---|-------------------|----|----|-----|-----------|--------------|
| 4 | He-O <sub>2</sub> | 15 | 75 | 0   | 0 ± 0 ab  | 1.1 ± 0.3 bc |
| 4 | He-O <sub>2</sub> | 15 | 75 | 160 | 0 ± 0 b   | 2.6 ± 1 b    |
| 4 | He-O <sub>2</sub> | 15 | 75 | 320 | 0 ± 0 b   | 2.2 ± 0.9 b  |
| 5 | He                | 15 | 35 | 0   | 0.1 ± 0   | NA           |
| 5 | He                | 15 | 35 | 160 | NA        | NA           |
| 5 | He                | 15 | 35 | 320 | 0.9 ± 0.1 | 11.7 ± 2 a   |
| 5 | He                | 15 | 55 | 0   | 0.1 ± 0   | 0.1 ± 0 c    |
| 5 | He                | 15 | 55 | 160 | NA        | 5 ± 1 b      |
| 5 | He                | 15 | 55 | 320 | 1.2 ± 0.7 | 1.4 ± 0.8 c  |
| 5 | He                | 15 | 75 | 0   | 1.3 ± 1.6 | 0.1 ± 0 c    |
| 5 | He                | 15 | 75 | 160 | NA        | 1.7 ± 0.3 c  |
| 5 | He                | 15 | 75 | 320 | NA        | 1 ± 0.3 c    |

736

737 **Table A3: Mean N<sub>2</sub> fluxes with standard deviations in mg m<sup>-2</sup> h<sup>-1</sup> from the loamy sand and the clayey silt, treated with**  
738 **different water-filled pore spaces (WFPS, %), amounts of digestate (kg N ha<sup>-1</sup>) as well as different temperature**  
739 **regimes (°C) under aerobic (He-O<sub>2</sub>) and anaerobic (He) atmosphere. Column 'Day' denotes the consecutive measuring**  
740 **days of the respective incubation cycle. Different letters after fluxes indicate significant differences (Tukey's HSD, *p* <**  
741 **0.05) within each soil and measuring day. Zeros as last digits were omitted.**

|   | Atmosphere        | Temperature<br>(°C) | WFPS (%) | kg N ha <sup>-1</sup> | mg N <sub>2</sub> m <sup>-2</sup> h <sup>-1</sup> |              |
|---|-------------------|---------------------|----------|-----------------------|---------------------------------------------------|--------------|
|   |                   |                     |          |                       | Loamy sand                                        | Clayey silt  |
| 1 | He-O <sub>2</sub> | 2                   | 35       | 0                     | 0 ± 0                                             | 0 ± 0 bc     |
| 1 | He-O <sub>2</sub> | 2                   | 35       | 160                   | 0 ± 0                                             | NA           |
| 1 | He-O <sub>2</sub> | 2                   | 35       | 320                   | 0 ± 0                                             | 0.1 ± 0.1 bc |
| 1 | He-O <sub>2</sub> | 2                   | 55       | 0                     | 0 ± 0                                             | 1.5 ± 0.3 a  |
| 1 | He-O <sub>2</sub> | 2                   | 55       | 160                   | 0 ± 0                                             | 1.5 ± 0.3 a  |
| 1 | He-O <sub>2</sub> | 2                   | 55       | 320                   | 0 ± 0                                             | 1.5 ± 0 a    |
| 1 | He-O <sub>2</sub> | 2                   | 75       | 0                     | 0 ± 0                                             | 1.2 ± 1.1 a  |
| 1 | He-O <sub>2</sub> | 2                   | 75       | 160                   | 0 ± 0                                             | 1.5 ± 0.2 a  |
| 1 | He-O <sub>2</sub> | 2                   | 75       | 320                   | 0 ± 0                                             | 1.7 ± 0.4 a  |
| 2 | He-O <sub>2</sub> | 2                   | 35       | 0                     | 0 ± 0                                             | 0 ± 0 c      |
| 2 | He-O <sub>2</sub> | 2                   | 35       | 160                   | 0 ± 0                                             | NA           |
| 2 | He-O <sub>2</sub> | 2                   | 35       | 320                   | 0 ± 0                                             | 0 ± 0 c      |
| 2 | He-O <sub>2</sub> | 2                   | 55       | 0                     | 0 ± 0                                             | 1.3 ± 0.1 a  |
| 2 | He-O <sub>2</sub> | 2                   | 55       | 160                   | 0 ± 0                                             | 0.8 ± 0.5 b  |
| 2 | He-O <sub>2</sub> | 2                   | 55       | 320                   | 0 ± 0                                             | 1.3 ± 0.3 a  |
| 2 | He-O <sub>2</sub> | 2                   | 75       | 0                     | 0 ± 0                                             | 1.4 ± 0.4 a  |
| 2 | He-O <sub>2</sub> | 2                   | 75       | 160                   | 0 ± 0                                             | 1.4 ± 0.5 a  |
| 2 | He-O <sub>2</sub> | 2                   | 75       | 320                   | 0 ± 0                                             | 1.4 ± 0.1 a  |
| 3 | He-O <sub>2</sub> | 15                  | 35       | 0                     | 0 ± 0 b                                           | 0 ± 0 e      |
| 3 | He-O <sub>2</sub> | 15                  | 35       | 160                   | 0 ± 0 b                                           | NA           |
| 3 | He-O <sub>2</sub> | 15                  | 35       | 320                   | 0.1 ± 0.1 ab                                      | 0 ± 0 e      |
| 3 | He-O <sub>2</sub> | 15                  | 55       | 0                     | 0 ± 0 b                                           | 1.8 ± 0.3 cd |
| 3 | He-O <sub>2</sub> | 15                  | 55       | 160                   | 0 ± 0 b                                           | 2.3 ± 0.4 bc |
| 3 | He-O <sub>2</sub> | 15                  | 55       | 320                   | 0 ± 0 b                                           | 2.5 ± 0.2 ab |
| 3 | He-O <sub>2</sub> | 15                  | 75       | 0                     | 0.2 ± 0.3 a                                       | 1.5 ± 0.2 d  |
| 3 | He-O <sub>2</sub> | 15                  | 75       | 160                   | 0 ± 0 b                                           | 3 ± 0.9 a    |
| 3 | He-O <sub>2</sub> | 15                  | 75       | 320                   | 0 ± 0 b                                           | 2.6 ± 0.8 ab |
| 4 | He-O <sub>2</sub> | 15                  | 35       | 0                     | 0 ± 0 b                                           | 0 ± 0 c      |
| 4 | He-O <sub>2</sub> | 15                  | 35       | 160                   | 0.1 ± 0.2 b                                       | NA           |
| 4 | He-O <sub>2</sub> | 15                  | 35       | 320                   | 0 ± 0 b                                           | 0 ± 0 c      |
| 4 | He-O <sub>2</sub> | 15                  | 55       | 0                     | 0.1 ± 0.1 b                                       | 1.5 ± 0.2 b  |
| 4 | He-O <sub>2</sub> | 15                  | 55       | 160                   | 0 ± 0 b                                           | 2.9 ± 0.6 a  |
| 4 | He-O <sub>2</sub> | 15                  | 55       | 320                   | 0.5 ± 0.4 a                                       | 2.8 ± 0.7 a  |

|   |                   |    |    |     |              |              |
|---|-------------------|----|----|-----|--------------|--------------|
| 4 | He-O <sub>2</sub> | 15 | 75 | 0   | 0 ± 0 b      | 1.3 ± 0.2 bc |
| 4 | He-O <sub>2</sub> | 15 | 75 | 160 | 0 ± 0 b      | 3.8 ± 1.6 a  |
| 4 | He-O <sub>2</sub> | 15 | 75 | 320 | 0 ± 0 b      | 3.3 ± 0.8 a  |
| 5 | He                | 15 | 35 | 0   | 3.3 ± 0.4 d  | 0 ± 0 c      |
| 5 | He                | 15 | 35 | 160 | NA           | NA           |
| 5 | He                | 15 | 35 | 320 | 22.9 ± 5.7 b | 1.8 ± 0.1 c  |
| 5 | He                | 15 | 55 | 0   | 6 ± 2.2 cd   | 1.8 ± 0.2    |
| 5 | He                | 15 | 55 | 160 | NA           | 9.5 ± 2.7 a  |
| 5 | He                | 15 | 55 | 320 | 35.1 ± 8.6 a | 5.1 ± 1.8 bc |
| 5 | He                | 15 | 75 | 0   | 9.2 ± 0.4 c  | 1.9 ± 0.1 c  |
| 5 | He                | 15 | 75 | 160 | NA           | 4.8 ± 1.6 bc |
| 5 | He                | 15 | 75 | 320 | 26.8 ± 1.1 b | 6.7 ± 0.8 b  |

743
