# Supplementary material for: N 2 O and N 2 losses from simulated injection of biogas digestate depend mainly on soil texture, moisture and temperature
Source: Copernicus journal article supplement (doi:10.5194/soil-2017-6), 2017-02-28
Supplement: Supplementary file [file soil-2017-6-AC6-supplement.pdf]

1 **Potential short-term losses of N<sub>2</sub>O and N<sub>2</sub> from high**  
2 **concentrations of biogas digestate in arable soils**

3 Sebastian Rainer Fiedler<sup>1</sup>, Jürgen Augustin<sup>2</sup>, Nicole Wrage-Mönnig<sup>1</sup>, Gerald Jurasinski<sup>1</sup>,  
4 Bertram Gusovius<sup>2</sup>, Stephan Glatzel<sup>1,\*</sup>

5 <sup>1</sup>Faculty of Agricultural and Environmental Sciences, University of Rostock, Rostock, 18059, Germany

6 <sup>2</sup>Institute for Landscape Biogeochemistry, Leibniz Centre for Agriculture Landscape Research (ZALF) e.V.,  
7 Müncheberg, 15374, Germany

8 \*now at: Department of Geography and Regional Research, University of Vienna, Vienna, 1010, Austria

9 *Correspondence to:* S. R. Fiedler (sebastian.fiedler@uni-rostock.de)

10 **Abstract.** Biogas digestate (BD) is increasingly used as organic fertiliser, but has a high potential for NH<sub>3</sub>  
11 losses. Its proposed injection into soils as a counter-measure has been suggested to promote the generation of  
12 N<sub>2</sub>O, leading to a potential trade-off. Furthermore, the effect of high nutrient concentrations on N<sub>2</sub> losses as they  
13 may appear after injection of BD into soil has not yet been evaluated. Hence, we performed an incubation  
14 experiment with soil cores in a helium-oxygen atmosphere to examine the influence of soil substrate (loamy  
15 sand, clayey silt), water-filled pore space (WFPS; 35, 55, 75%) and application rate (0, 17.6 and 35.2 mL BD per  
16 soil core [250 cm<sup>3</sup>]) on the emissions of N<sub>2</sub>O, N<sub>2</sub> and CO<sub>2</sub> after the usage of high loads of BD. To determine the  
17 potential capacity for gaseous losses, we applied anaerobic conditions by purging with helium for the last 24 h of  
18 incubation. Immediate N<sub>2</sub>O and N<sub>2</sub> emissions as well as the N<sub>2</sub>/(N<sub>2</sub>O+N<sub>2</sub>) ratio depended on soil type and  
19 increased with WFPS indicating a crucial role of soil gas diffusivity for the formation of nitrogenous gases in  
20 agricultural soils. However, the emissions did not increase with the application rate of BD probably due to an  
21 inhibitory effect of the high NH<sub>4</sub><sup>+</sup> content in BD. Our results suggest a larger potential for N<sub>2</sub>O formation in the  
22 fine-textured clayey silt compared to the coarse loamy sand after applying high concentrations of BD as  
23 appearing after injection. However, the loamy sand showed basically a large potential for N<sub>2</sub> formation under  
24 anaerobic headspace conditions. Nevertheless, our results show the need for further investigations on the  
25 dynamics and the duration of the observed effects and their significance for field conditions.

## 26 1 Introduction

27 Nitrous oxide (N<sub>2</sub>O) is a potent greenhouse gas (Myhre et al., 2013), with agriculture being the largest single  
28 source of anthropogenic N<sub>2</sub>O emissions, contributing about 4.1 Tg N<sub>2</sub>O-N yr<sup>-1</sup> or 66% of total gross  
29 anthropogenic emissions mainly as a result of mineral nitrogen (N) fertiliser and manure application (Davidson  
30 and Kanter, 2014). The generation of nitrogen gas (N<sub>2</sub>) is of agronomic interest in terms of nutrient management,  
31 since such gaseous losses may imply a significant loss of N from the soil/plant system (Friedl et al., 2016, 2016;  
32 Cameron et al., 2013). However, from an environmental stance, N<sub>2</sub> is innocuous and, thus, the preferred type of  
33 gaseous N-loss from soil (Davidson et al., 2015). In general, the improvement of N use efficiency and thus the  
34 decrease of N losses in crop production are paramount in the presence of challenges like food security,  
35 environmental degradation and climate change (Zhang et al., 2015).

36 Digestion residues (biogas digestate, BD) from biogas plants are used as organic amendment in agriculture. But,  
37 compared to undigested amendments, digestion results in an increased pH, a higher proportion of ammonium

38 ( $\text{NH}_4^+$ ) and a narrowed C to N of the BD (Möller and Müller, 2012). This altered chemical properties may  
39 promote biochemical reactions in the soil that are responsible for the formation of gaseous N species like  $\text{N}_2\text{O}$ ,  
40 nitric oxide (NO),  $\text{N}_2$  and ammonia ( $\text{NH}_3$ ) (Nkoa, 2013).

41 Significant losses of N as  $\text{NH}_3$  can occur within the first hours after manure application (Quakernack et al.,  
42 2012). To reduce  $\text{NH}_3$  losses, the application of BD by injection is recommended, but this measure can  
43 simultaneously increase the potential for  $\text{N}_2\text{O}$  losses compared to surface-application (Wulf et al., 2002; Velthof  
44 and Mosquera, 2011). On the one hand, high  $\text{NH}_4^+$  concentrations in the injection band promote nitrification,  
45 which is a significantly  $\text{O}_2$  consuming process releasing  $\text{N}_2\text{O}$  (Christensen and Rowe, 1984). On the other hand,  
46 increased amounts of C in the injection band also promote respiration and, thus, additionally deplete the  $\text{O}_2$   
47 supply (Dell et al., 2011). Altogether, the conditions during the initial phase after injection of BD foster  
48 microsites favourable for microbial denitrification, which may promote also the formation of  $\text{N}_2$  due to anaerobic  
49 conditions (Köster et al., 2015; Webb et al., 2010).

50 There is a wealth of biotic and abiotic processes in soils that produce  $\text{N}_2\text{O}$  and  $\text{N}_2$ , depending on mineral N  
51 content, carbon (C) availability as well as on temperature, most of which are enhanced by anaerobic or at least  
52 suboxic conditions (Butterbach-Bahl et al., 2013). The amounts and the relative share of  $\text{N}_2$  and  $\text{N}_2\text{O}$  in the  
53 overall gaseous N emissions depend – among other factors – on the degree of  $\text{O}_2$  restriction (Firestone and  
54 Davidson, 1989). Soil physical and biotic factors (i.e. diffusion permitted by soil porosity in conjunction with  
55 water-filled pore space [WFPS] as well as consumption of  $\text{O}_2$  by heterotrophic respiration and nitrification)  
56 control the aerobic status of a soil (Ball, 2013; Uchida et al., 2008; Maag and Vinther, 1999). In general, fine  
57 textured soils with higher clay contents exhibit a lower gas diffusivity compared to coarse textured soils, which  
58 result regularly in higher denitrification activity in the former with higher  $\text{N}_2\text{O}$  emission rates, but also a higher  
59 probability for the consecutive reduction to  $\text{N}_2$  (Senbayram et al., 2014; Gu et al., 2013; Ball, 2013).

60 There is a general lack of knowledge about the effects of high BD concentrations on gaseous N-losses as they  
61 might appear after injection into soils and their interactions with  $\text{O}_2$  limiting factors like soil texture and WFPS,  
62 as well as temperature and heterotrophic respiration. Thus, we applied the helium-oxygen ( $\text{He-O}_2$ ) incubation  
63 technique (Butterbach-Bahl et al., 2002) in a laboratory experiment to evaluate the effect of above suggested  
64 factors on the emission of  $\text{N}_2\text{O}$  and  $\text{N}_2$  from different soils. Simultaneously,  $\text{CO}_2$  flux was determined as an  
65 indicator for microbial  $\text{O}_2$  consumption,  $\text{O}_2$  diffusion and also for the degradability of organic C applied with BD  
66 (Blagodatsky and Smith, 2012), but with the restriction that inorganic sources could not be differentiated. We  
67 hypothesised that (1)  $\text{N}_2\text{O}$  and  $\text{N}_2$  emissions will increase with WFPS, (2) this gaseous N losses will also be

68 affected by BD application rate, i.e. the hypothetical concentration resulting from injection, and (3) the fine  
69 textured clayey silt will induce higher gaseous N losses than the coarse loamy sand.

## 70 2 Material and Methods

### 71 2.1 Selected soils, sampling of soil cores and biogas digestate

72 Two soils were selected and both were adjusted to three levels of WFPS and three quantities of BD (Table 1),  
73 resulting in 18 factor combinations with three repetitions each. Temperature was increased from 2 °C during the  
74 first two days to 15 °C for the last three days of the incubation. Intact soil cores (diameter 7.2 cm, height 6.1 cm,  
75 volume 250 cm<sup>3</sup>) were taken with sample rings in the range from 0–0.10 m depth from two sites with different  
76 textures, i.e. sandy loam and clayey silt. The sandy loam samples were collected from a stagnic luvisol (IUSS  
77 Working Group WRB, 2006) located in Gülzow (North-East Germany) in the ground moraine of the  
78 Weichselian glacial period at 53° 48' 35" N and 12° 4' 20" E. The clayey silt samples were collected from a  
79 haplic luvisol located in Dornburg between the foothills and the lowlands of Central Germany at 51° 0' 8" N and  
80 11° 39' 25" E (see Table 2 for more details on soil characteristics). After field sampling, the soil cores were dried  
81 for 48 h at 40 °C to facilitate adjustment of WFPS.

82 Both sites have been cultivated with similar crop rotations used as feedstock for biogas production and have been  
83 amended with biogas digestate for the past nine years. The crop rotation on the sandy loam consisted of maize  
84 (*Zea mays* L.), rye (*Secale cereale* L.), sorghum (*Sorghum bicolor* (L.) MOENCH), winter triticale (×  
85 *Triticosecale* Wittmack), ryegrass (*Lolium perenne* L.) and winter wheat (*Triticum aestivum* L.). The only  
86 difference in the crop rotation on the clayey silt was the cultivation of sudangrass (*Sorghum × drummondii*)  
87 instead of sorghum.

88 The biogas digestate used for the incubation was obtained from a biogas plant at 'Gut Dalwitz', an organic farm  
89 in northeast Germany. The feedstock for the anaerobic fermentation in the plant consisted of 60 % maize, 20 %  
90 solid cattle manure, 10 % dry chicken manure and 10 % rye. The digestate was analysed by 'LUFÄ', Rostock,  
91 Germany and had a pH of 8.3, 2.91% organic C, 0.16% dissolved organic C (DOC), 0.54% N and 0.27% NH<sub>4</sub>-N  
92 in undried material with a dry matter content of 9.4%.

## 93 2.2 Adjustment of WFPS and addition of N

94 For adjustment of WFPS, the dry and undisturbed soil cores were moistened dropwise. The respective quantities  
95 of water were calculated based on the bulk density, an assumed particle density of  $2.65 \text{ g cm}^{-1}$  and reduced by  
96 the expected moisture input from subsequent addition of BD. The soil cores were then mixed with BD and  
97 finally repacked to reach nutrient concentrations comparable to that in injection bands. The amounts of added  
98 BD were calculated with an assumed injection of  $160 \text{ kg N ha}^{-1}$  into soil with row spaces of  $0.15 \text{ m}$  (narrow  
99 injection bands with low BD concentration, LOBD) and  $0.30 \text{ m}$  (wide injection bands with high BD  
100 concentration, HIBD), which are common ranges used by injection machinery and which correspond to  $17.6$  and  
101  $25.3 \text{ mL BD}$ , respectively, per sample ring. After this procedure, the soil cores were sealed with plastic lids and  
102 stored immediately at  $2 \text{ }^\circ\text{C}$  until the beginning of the incubation within a week.

## 103 2.3 Determination of gas fluxes

104 The measurements of  $\text{N}_2$ ,  $\text{N}_2\text{O}$  and  $\text{CO}_2$  fluxes were applied following the He- $\text{O}_2$  method (Scholefield et al.,  
105 1997; Butterbach-Bahl et al., 2002). Six soil cores (i.e. the repetitions of two factor combinations at a time, Table  
106 3) were placed simultaneously in special gas-tight incubation vessels inside a climate chamber. Analyses were  
107 conducted in the laboratory of the Institute for Landscape Biogeochemistry, Leibniz Centre for Agricultural  
108 Landscape Research (ZALF), Müncheberg, Germany. Before flux measurements, the vessels were evacuated  
109 moderately ( $0.047 \text{ bar}$ ) and flushed with an artificial He/ $\text{O}_2$  gas mixture ( $20.49 \text{ } \%$   $\text{O}_2$ ,  $345.5 \text{ ppm CO}_2$ ,  $359 \text{ ppb}$   
110  $\text{N}_2\text{O}$ ,  $1863 \text{ ppb CH}_4$ ,  $2.46 \text{ ppm N}_2$ , rest He) four times consecutively to remove ambient  $\text{N}_2$ . Subsequently, the air  
111 temperature of the climate chamber was set to  $2 \text{ }^\circ\text{C}$  and a continuous He/ $\text{O}_2$  gas flow rate of  $15 \text{ ml min}^{-1}$  was  
112 applied to the vessel headspaces for  $72 \text{ h}$  to remove residues of  $\text{N}_2$  from soil cores by diffusion, including a  
113 restricted  $\text{N}_2$  production by decreased microbial activity. After this pre-incubation, during the following two  
114 days, the headspace concentration of  $\text{N}_2\text{O}$  and  $\text{CO}_2$  was measured once daily in the morning. To compensate for  
115 the lower precision of the detector for  $\text{N}_2$  in relation to the detector for  $\text{N}_2\text{O}$  and  $\text{CO}_2$  (Eickenscheidt et al.,  
116 2014),  $\text{N}_2$  concentrations were measured consecutively three times daily in the morning. Immediately after the  
117 last measurement on the second day, the temperature was set to  $15 \text{ }^\circ\text{C}$  and the measurements were continued for  
118 another two days. Finally, the He/ $\text{O}_2$  gas mixture was substituted by pure He and, following  $24 \text{ h}$  of  
119 acclimatisation, gas measurements were carried out once again (Figure 1) to determine the generation of  $\text{N}_2\text{O}$   
120 and  $\text{N}_2$  in a completely anaerobic soil matrix. The latter step is important to get a clue about the actual potential

121 for gaseous N losses after highly concentrated BD application. The settings of the chromatographs for gas  
122 analyses are described in Eickenscheidt et al. (2014). Gas fluxes were calculated according to Eq. (1):

$$123 \quad f = \frac{M \times p \times v \times dc}{R \times T \times A}, \quad (1)$$

124 where  $f$  is the flux ( $\text{N}_2$  and  $\text{CO}_2$ :  $\text{mg m}^{-2} \text{h}^{-1}$ ,  $\text{N}_2\text{O}$ :  $\mu\text{g m}^{-2} \text{h}^{-1}$ ),  $M$  the molar mass in  $\text{g mol}^{-1}$  ( $\text{N}_2$ : 28,  $\text{CO}_2$ : 44,  
125  $\text{N}_2\text{O}$ : 44),  $p$  the air pressure (Pa),  $v$  the air flow ( $\text{L h}^{-1}$ ),  $R$  the gas constant ( $8.31 \text{ J mol}^{-1} \text{ K}^{-1}$ ),  $T$  the temperature  
126 inside the chamber (K),  $A$  the area of the incubation vessel ( $\text{m}^2$ ), and  $dc$  the difference of gas concentrations ( $\text{N}_2$   
127 and  $\text{CO}_2$ : ppm,  $\text{N}_2\text{O}$ : ppb) between inlet and outlet of a vessel.

128 To enhance the tightness against atmospheric  $\text{N}_2$  contamination, the lids of the incubation vessels were purged  
129 permanently with helium. We obtained blank values by inserting aluminium blocks into the vessels before each  
130 measurement cycle. Since this blank values were usually steady with means of 1.9 ( $1\sigma = 0.9$ ) ppm  $\text{N}_2$ , 349.6 ( $1\sigma$   
131 = 11.4) ppb  $\text{N}_2\text{O}$  and 353.9 ( $1\sigma = 13.5$ ) ppm  $\text{CO}_2$ , we suggest that the vessels were tight. Derived from the blank  
132 values, lowest detectable fluxes were on average 0.427 ( $1\sigma = 0.271$ )  $\text{mg N}_2\text{-N m}^{-2} \text{h}^{-1}$ , 3.6 (3.1)  $\mu\text{g N}_2\text{O-N m}^{-2} \text{h}^{-1}$   
133 and 0.918 (0.693)  $\text{mg CO}_2\text{-C m}^{-2} \text{h}^{-1}$ . For flux estimation, the blank values were subtracted from the values  
134 measured at the respective outlet. Estimated fluxes from the soil cores smaller than the respective blank fluxes of  
135 each day were set to zero.

136

## 137 2.4 Soil analyses after incubation

138 After incubation, the soil cores were stored at 2 °C until they were extracted with 0.1 M KCl solution (soil to  
139 extract ratio 1:4, standardised extraction method of the commissioned laboratory at Leibniz Centre for  
140 Agricultural Landscape Research e. V.) and analysed for  $\text{NH}_4^+$  and nitrate ( $\text{NO}_3^-$ ) by spectrophotometry  
141 according to DIN ISO 14256 with a continuous flow analyser 'CFA-SAN', Skalar Analytical B.V., the  
142 Netherlands and for DOC by combustion according to DIN ISO 10694 with an analyser 'RC 612', Leco  
143 Instruments GmbH, Germany.

## 144 2.5 Statistical analysis

145 All statistical analyses were done using R version 3.2.3 (R Core Team, 2015) with the data of the measuring  
146 days under He- $\text{O}_2$  atmosphere. Data from the vessels with the factor combination of 35% WFPS and LOBD with  
147 clayey silt were omitted due to technical reasons during sample preparation. For the final period of pure He

148 headspace, some gas concentration data are missing due to logistical reasons. For the loamy sand, this affects all  
149 WFPS levels with LOBD ( $N_2$  and  $N_2O$ ), the treatment 75% WFPS with  $320 \text{ kg N h}^{-1}$  ( $N_2O$  and  $CO_2$ ) and for the  
150 clayey silt the treatment 35% WFPS without amendment ( $N_2O$  and  $CO_2$ ).

151 To account for repeated measurement of vessels, linear mixed effect models were applied with package  
152 'lmerTest' version 2.0-33 (Kuznetsova et al., 2016) for fluxes of each gas type. The three pseudo-replicated  
153 fluxes from the  $N_2$  measurements of each vessel were averaged for each day to obtain the same number of  
154 observations as for  $N_2O$  and  $CO_2$  fluxes. The fixed structure of models included soil type, WFPS, amount of  
155 digestate, temperature,  $NO_3^-$  and DOC contents after incubation as well as the fluxes of  $N_2O$  (in the model for  
156  $N_2$ ) and  $CO_2$  (in the models for  $N_2$ ,  $N_2O$  and  $N_2/[N_2+N_2O]$  product ratio). Soil  $NH_4^+$  was omitted since it showed  
157 high autocorrelation with the amount of BD applied. The individual soil cores in the vessels were set as random  
158 effect (nested within the week of incubation and with allowance for a variable slope of the effect each day) with  
159 regard to lack of independence of consecutive measurements. The model responses for  $N_2$ ,  $N_2O$  and  $CO_2$  were  
160 log transformed ( $\ln[\text{value} + 1]$ ) since gas fluxes from soils usually show lognormal distributions (Kaiser et al.,  
161 1998). The function 'step' was used for automatic backward selection of models based on AIC (Akaike's 'An  
162 Information Criterion'). The skewness ( $\gamma$ ) was calculated with R package 'moments' version 0.14 (Komsta and  
163 Novomestky, 2015) to check residuals for normal distribution and  $|\gamma| \leq 2$  was assumed as appropriate (West et  
164 al., 1995). For mixed effects models,  $p$ -values of the ANOVA (type 2) were calculated based on Satterthwaite's  
165 approximation)  
166 Cumulated gas fluxes were estimated with a bootstrap method using function 'auc.mc' of R package 'flux'  
167 version 0.3-0 (Jurasinski et al., 2014) for the R statistical software version 3.2.3 (R Core Team, 2015). In short,  
168 the fluxes for the period of aerobic headspace were cumulated in 100 iterations, while for each run 2 fluxes were  
169 omitted randomly. Then, the resulting data were used to calculate means and standard deviations.

## 170 **3 Results**

### 171 **3.1 Soil $NH_4^+$ , $NO_3^-$ and DOC contents**

172 The calculated application of  $NH_4^+$ -N from BD per kg soil approximated for the sandy loam 247.0 mg (LOBD)  
173 and 494.0 mg (HIBD), and for the clayey silt 266.0 mg (LOBD) and 532.0 mg (HIBD). The  $NO_3^-$  content of BD  
174 was negligible. In general, the  $NH_4^+$  content of the soils after incubation increased with digestate application  
175 with lower amounts detected in the clayey silt. Nitrate was found almost exclusively in the latter soil. (Fig. 2).

176 The amounts of measured DOC increased with the application rate of BD, but with higher magnitudes for the  
177 loamy sand than for the clayey silt (Table 4).

### 178 3.2 CO<sub>2</sub> fluxes

179 CO<sub>2</sub> fluxes showed clear differences between the soils: under all combinations of temperature and oxygen, the  
180 fluxes were always larger from the loamy sand compared with the clayey silt (Table A1). In general, the mean  
181 fluxes from the loamy sand increased with the amount of digestate during each of the different periods regarding  
182 temperature and headspace aerobicity, but showed no obvious pattern with WFPS. There was no clear trend of  
183 fluxes with the amount of amendment, but a slight trend of decreasing fluxes with increasing WFPS for the  
184 clayey silt. However, the predictive power of WFPS on CO<sub>2</sub>-C fluxes was minor since it was eliminated during  
185 stepwise regression fitting. By contrast, soil type, amount of digestate, temperature as well as the DOC content  
186 after the incubation had significant ( $p < 0.01$ ) effects (Table 5).

### 187 3.3 N<sub>2</sub>O fluxes

188 The mean N<sub>2</sub>O fluxes from the loamy sand in the He-O<sub>2</sub> headspace were virtually zero, independent of  
189 temperature and WFPS as well as the amount of BD application (Fig. 3, Table A2). In contrast, the emissions of  
190 the clayey silt increased with temperature and were highest at 15 °C with intermediate WFPS and amount of BD,  
191 i.e. 6.2 mg N<sub>2</sub>O-N m<sup>-2</sup> h<sup>-1</sup> at 55% with LOBD, respectively. Surprisingly, at 15 °C, increasing the amount of BD  
192 up to HIBD did not increase the observed N<sub>2</sub>O efflux; rather it decreased the efflux significantly ( $p < 0.05$ ,  
193 Tuckey's HSD) at 55% and also, but not significantly, at 75% WFPS (Fig. 3, Table A2). According to the linear  
194 mixed model for N<sub>2</sub>O fluxes in aerobic conditions, WFPS, amount of digestate, temperature, DOC content of  
195 soil after incubation and CO<sub>2</sub> fluxes had significant ( $p < 0.001$ ) effects on N<sub>2</sub>O flux (Table 5).

196 Under anaerobic headspace conditions, the overall highest mean N<sub>2</sub>O flux was observed from the clayey silt at  
197 35% WFPS with HIBD (11.7 mg N<sub>2</sub>O-N m<sup>-2</sup> h<sup>-1</sup>). The same soil showed a tendency of decreasing N<sub>2</sub>O fluxes  
198 with increasing WFPS and amendment. In the loamy sand, the pure He-atmosphere induced increasing mean  
199 N<sub>2</sub>O fluxes (up to 1.3 mg N<sub>2</sub>O-N m<sup>-2</sup> h<sup>-1</sup>) with increasing WFPS (Fig. 3, Table A2). Thus, the anaerobic  
200 headspace induced a change only in the loamy sand by increasing emissions.



### 201 3.4 N<sub>2</sub> fluxes

202 From the loamy sand, no or negligible N<sub>2</sub> fluxes were detected at both temperatures under He-O<sub>2</sub> atmosphere  
203 (Fig. 4, Table A3). The clayey silt showed mean fluxes of up to 1.4 mg N<sub>2</sub> m<sup>-2</sup> h<sup>-1</sup> at 2 °C (all incubations with  
204 75% WFPS) and up to 3.8 mg N<sub>2</sub> m<sup>-2</sup> h<sup>-1</sup> at 15 °C (75% WFPS with LOBD), but no fluxes in all BD treatments  
205 with 35% WFPS. Put simply, temperature had a small effect on N<sub>2</sub> emissions from the sandy loam with no  
206 consistent influence of WFPS and the amount of BD. In contrast, the clayey silt emitted clearly increasing fluxes  
207 with increasing temperature and WFPS. However, the application raise from LOBD up to HIBD at 15 °C,  
208 resulted in slightly, but not significantly ( $p > 0.05$ , Tuckey's HSD), decreased fluxes (Fig. 4, Table A3). The  
209 summary of the linear mixed model for N<sub>2</sub> fluxes under aerobic conditions revealed significant effects ( $p < 0.05$ )  
210 of soil type, WFPS, the amount of digestate, temperature, DOC content after incubation and N<sub>2</sub>O flux (Table 5).  
211 After switching the atmosphere to pure He, the N<sub>2</sub> fluxes from the sandy loam increased more than 60-fold. In  
212 contrast to aerobic conditions, all measured factor combinations showed mean fluxes up to 35.1 mg N<sub>2</sub> m<sup>-2</sup> h<sup>-1</sup>  
213 (55% with 320 kg N ha<sup>-1</sup>) (Fig. 2, Day 5 in Table A3). The mean fluxes from the clayey silt increased only up to  
214 9.3 mg N<sub>2</sub> m<sup>-2</sup> h<sup>-1</sup> in amended treatments. Thus, the loamy sand exhibited a much more intense reaction under  
215 anaerobic headspace conditions.

### 216 3.5 N<sub>2</sub>/(N<sub>2</sub> + N<sub>2</sub>O-N) product ratio

217 No clear trend of the product ratio of N<sub>2</sub>/(N<sub>2</sub> + N<sub>2</sub>O-N) was found for incubations of the loamy sand. However,  
218 there was a clear distinction of the ratios for this soil under aerobic and anaerobic atmospheres: while the ratios  
219 were close to zero in the former, they were close to 1 in the latter (Fig. 5). In contrast, in the clayey silt the ratios  
220 increased with WFPS and were affected by digestate amendment under both the aerobic and the anaerobic  
221 atmospheres, where the highest ratios (up to 0.8) were found in treatments without digestate and at least 55%  
222 WFPS. The digestate-amended treatments showed mostly ratios around or above 0.5, with exception of the 35%  
223 WFPS treatments, which had ratios close to zero. According to the linear mixed model, the product ratio under  
224 aerobic conditions was affected significantly ( $p < 0.01$ ) by soil type and the amount of digestate (Table 5).

225 **4 Discussion**

226 **4.1 Increased BD application rate did not increase N<sub>2</sub>O and N<sub>2</sub> losses probably due to inhibitory effect**  
227 **of high NH<sub>4</sub><sup>+</sup> concentrations**

228 The overall N<sub>2</sub>O fluxes corresponded well with those from other studies with similar incubation conditions and  
229 application rates of BD in terms of N ha<sup>-1</sup> (Severin et al., 2015; Senbayram et al., 2012; Köster et al., 2015).  
230 However, the latter studies assumed a distribution of BD into soil by a cultivator, which implies a smaller  
231 concentration of BD compared to its occurrence in injection slits. Although we observed differences in N<sub>2</sub>O  
232 emissions between soils, soil type was not confirmed as a significant effect. Nevertheless, WFPS and  
233 temperature, which are well known controllers of N<sub>2</sub>O generation (Maag and Vinther, 1999), showed significant  
234 influences. Both are physical (by gas diffusion) and biological (by increased metabolic activity and consequently  
235 increased O<sub>2</sub> consumption by respiration) drivers for O<sub>2</sub> availability, respectively (Maag and Vinther, 1999; Ball,  
236 2013). Accordingly, the CO<sub>2</sub> flux (resulting from respiration of O<sub>2</sub>) generally increased with temperature and  
237 was also identified as significant by regression selection.

238 The mean N<sub>2</sub> fluxes of up to 0.5 (loamy sand) and 3.8 mg N m<sup>-2</sup> h<sup>-1</sup> (clayey silt) at 15° C (Fig. 5, Table A3) were  
239 considerably smaller than the mean fluxes of up to 13.0 mg m<sup>-2</sup> h<sup>-1</sup> observed by Köster et al. (2015) during the  
240 first five days of their incubation. Although the amount of BD in terms of applied N (250 kg ha<sup>-1</sup>) was  
241 comparable, Köster et al. (2015) used a higher WFPS of 90%, which may have increased the generation of N<sub>2</sub>. In  
242 contrast to N<sub>2</sub>O emission rates, the observed N<sub>2</sub> fluxes depended not only on WFPS, but also on soil type (Table  
243 5), most likely due to the direct influence of soil structure on diffusivity and, thus, the supply with O<sub>2</sub> (Balaine et  
244 al. 2016; Butterbach-Bahl et al. 2013). N<sub>2</sub>O flux showed also a significant effect during regression selection for  
245 N<sub>2</sub>. N<sub>2</sub>O is the direct precursor of N<sub>2</sub> in denitrification and, hence, the flux of the latter depends on the  
246 availability of the former. However, temperature showed no significant effect.

247 The N<sub>2</sub>/(N<sub>2</sub>+N<sub>2</sub>O) ratios were significantly determined only by soil type and WFPS: while no clear trend was  
248 observable for the loamy sand, there was a pronounced effect in the clayey silt (Fig 4). We attribute the lack of a  
249 trend in the loamy sand to generally adverse conditions for the formation of N<sub>2</sub>O and N<sub>2</sub>. Contrary, the influence  
250 of WFPS apparently mirrored favourable conditions in the clayey silt (Table 5). Simultaneously, with increasing  
251 WFPS, the reduction of N<sub>2</sub>O accelerates as an alternative electron acceptor under reduced O<sub>2</sub> supply (Tiedje,  
252 1988). Accordingly, no or rather small fluxes of the investigated gaseous N species were generally found in our  
253 presumably well aerated treatments with 35% WFPS.

254 In our study, one treatment (clayey silt, 55% WFPS, LOBD) showed exceptionally large mean N<sub>2</sub>O fluxes of up  
255 to 7.1 mg N m<sup>-2</sup> h<sup>-1</sup> (Fig. 3, Table A2). This could be evidence that injection of such commonly applied amounts  
256 of BD-N (i.e., 160 kg N ha<sup>-1</sup>) may favour much larger losses of N<sub>2</sub>O compared to an even distribution of BD in  
257 soils due to larger substrate concentration in injection slits. However, with higher amendments (i.e. HIBD), we  
258 observed surprisingly partially significant ( $p < 0.05$ , Tuckey's HSD) reductions of N<sub>2</sub>O and a decreasing  
259 tendency of N<sub>2</sub> emissions (Table A2, Table A3). In line with this, the amount of BD showed a significant effect  
260 during the regression selection on N<sub>2</sub>O, but not on N<sub>2</sub> fluxes (Table 5). A coherent reason for the rather smaller  
261 emissions of highly amended HIBD treatments might be the inhibitory effect of NH<sub>3</sub> on nitrification.  
262 Accordingly, Anthonisen et al. (1976) found an inhibition by concentrations from 0.1 to 150 mg NH<sub>3</sub> L<sup>-1</sup>. The  
263 application rate in the treatments with HIBD amounted to approximately 500 mg NH<sub>4</sub><sup>+</sup>-N (kg soil)<sup>-1</sup> (Fig. 3)  
264 which correspond to 25.8 mg NH<sub>3</sub>-N (kg soil)<sup>-1</sup> at 15 °C if we use the pH of the BD and assume that all  
265 extractable NH<sub>4</sub><sup>+</sup>-N was in solution (Emerson et al., 1975). Hence, we consider this inhibitory effect as the  
266 reason for the missing increase of N<sub>2</sub>O and N<sub>2</sub>. Additionally, due to the increased pH of BD (Möller and Müller,  
267 2012), the amount of NH<sub>4</sub><sup>+</sup> fixed as NH<sub>3</sub> by soil organic matter increases and, moreover, this fixed NH<sub>3</sub> is not  
268 readily extractable by the KCl method we have applied (Kissel et al., 2008). This is consistent with the  
269 observation of generally higher N<sub>2</sub>O and N<sub>2</sub> fluxes from the clayey silt since clay increases the sorption capacity  
270 of soils for NH<sub>4</sub><sup>+</sup> and may, thus, reduce the inhibitory effect on nitrification (Kissel et al., 2008). However,  
271 because we mixed the BD with the soil, we would expect a lower NH<sub>3</sub> fixation in tubular injection slits *in situ*,  
272 resulting in probably lower N<sub>2</sub>O and N<sub>2</sub> fluxes from clayey soils.

273 Actually, high NH<sub>4</sub><sup>+</sup> loads in conjunction with an increased pH favour NO<sub>2</sub><sup>-</sup> accumulation, because NO<sub>2</sub><sup>-</sup>  
274 oxidising bacteria are less resilient against high concentrations of NH<sub>3</sub> than NH<sub>3</sub> oxidising bacteria (Anthonisen  
275 et al., 1976). This NO<sub>2</sub><sup>-</sup> should have protonated then partly to the toxic and unstable HNO<sub>2</sub>, which drives  
276 biological and chemical production of NO and N<sub>2</sub>O for detoxification (Venterea et al., 2015). Although we have  
277 not determined NO<sub>2</sub><sup>-</sup>, we suggest a dominant role of nitrifier denitrification, i.e., NO<sub>2</sub><sup>-</sup> reduction, in the  
278 generation of N<sub>2</sub>O during our experiment, especially during the anaerobic headspace conditions at the end of the  
279 incubation, resulting in the relatively small NO<sub>3</sub><sup>-</sup> recovery in both soils. Accordingly, coupled nitrification-  
280 denitrification and bacterial denitrification have been found to dominate the production of N<sub>2</sub>O directly after  
281 application of BD (Köster et al., 2011; Senbayram et al., 2009). However, N<sub>2</sub>O-N losses were clearly larger than  
282 N<sub>2</sub> losses under aerobic headspace in the clayey silt, indicating that much of the N gas loss was driven by

283 processes other than canonical denitrification. Under the above mentioned conditions, NO-N losses may exceed  
284 N<sub>2</sub>O losses (Venterea et al., 2015), calling for taking account of NO measurements in future studies.

#### 285 4.2 Different effects of soil diffusivity on N<sub>2</sub>O and N<sub>2</sub> fluxes

286 Apparently, the tested factors affected the N<sub>2</sub>O and N<sub>2</sub> fluxes from both soils in a different way. A specific soil  
287 characteristic that exhibits such a fundamental control on biogeochemical processes such as denitrification is the  
288 diffusivity for O<sub>2</sub> (Ball, 2013, 2013; Letey et al., 1980; Parkin and Tiedje, 1984), which is a main soil  
289 characteristic responsible for the appearance of anaerobic microsites. In general, diffusivity integrates the soil  
290 porosity, i.e., pore continuity and size as well as WFPS, which control both soil N<sub>2</sub>O and N<sub>2</sub> emissions (Balaine  
291 et al., 2016; Letey et al., 1980; Ball, 2013). Soils with a coarser texture like the loamy sand have a higher  
292 proportion of macro-pores and thus a higher gas diffusion compared with fine textured soils like the clayey silt  
293 we used (Groffman and Tiedje, 1991). This lets us expect conditions that are more favourable for N<sub>2</sub>O and N<sub>2</sub>  
294 generation in the latter due to relatively poor diffusion characteristics and, thus, a smaller O<sub>2</sub> supply. Actually,  
295 although we incubated the soils at comparable levels of WFPS and BD amendments, the apparent lower  
296 diffusivity led to larger N<sub>2</sub>O and N<sub>2</sub> production in the treatments with the clayey silt in relation to the loamy  
297 sand.

298 The role of the distinct diffusivities of both soils is corroborated by our observations of the gas fluxes in  
299 anaerobic headspace. With switching the He-O<sub>2</sub> atmosphere in the headspace to pure He, the denitrification  
300 potential can be tested because anaerobicity eliminates respiration processes that use O<sub>2</sub> as electron acceptor  
301 (Parkin and Tiedje, 1984). We acknowledge e.g. DNRA and anammox as possible additional sources of N<sub>2</sub>O and  
302 N<sub>2</sub>, respectively, under such conditions, but we were not able to quantify their contribution. The anaerobic  
303 headspace induced a considerable increase of N<sub>2</sub>O fluxes in the loamy sand, but not in the clayey silt.  
304 Concurrently, the N<sub>2</sub> fluxes increased in both soils, but pronounced, i.e. more than 60-fold, in the sandy loam.  
305 These observed changes resulting from oxygen deprivation imply that, during the previous aerobic conditions,  
306 the diffusivity of the sandy loam was too high to allow for a sufficient establishment of anaerobic microsites,  
307 while the clayey silt ensured a moderate diffusional constraint to maintain suboxic conditions. In general, only  
308 N<sub>2</sub>O fluxes from treatments with negligible fluxes during the previous aerobic period increased under anaerobic  
309 conditions, including all treatments with loamy sand (Fig. 3, Table A2). At the same time, there was a reduction  
310 of N<sub>2</sub>O fluxes in most clayey silt treatments. However, when we take a closer look at the simultaneous changes  
311 of N<sub>2</sub> fluxes after atmosphere change, virtually all of the respective treatments showed increased rates. Hence,

312 there was an enhanced reduction of  $N_2O$  to  $N_2$ , which is reflected in the increased  $N_2/(N_2 + N_2O)$  ratio (Fig. 5)  
313 and points to intensified reduction of  $N_2O$  due to the lack of oxygen (Parkin and Tiedje, 1984). The much larger  
314  $N_2$  fluxes from the loamy sand compared to the clayey silt might have been caused additionally by small  $NO_3^-$   
315 availability (Fig. 2) and a high availability of C (Table 4), which promoted the reduction of  $N_2O$  to  $N_2$   
316 (Senbayram et al., 2012). Further, we found no evidence for any shortage of substrate in the clayey silt during  
317 the subsequent anaerobic headspace conditions. However, the cumulated fluxes of both  $N_2$  and  $N_2O$  amounted to  
318 a maximum absolute loss of 9.4 ( $1\sigma = 0.3$ ) mg N per kg soil in the clayey silt with LOBD and 55% WFPS, which  
319 was roughly 3.5% of the calculated  $NH_4^+$ -N applied with BD (Fig. 2). On the other hand, the  $N_2/(N_2+N_2O)$  ratios  
320 increased only slightly (Fig. 5) and, in contrast to the loamy sand, there were still significant  $N_2O$  fluxes in the  
321 clayey silt (Fig. 3), which point to still sufficient stocks of  $NO_3^-$  in the latter (Senbayram et al., 2012). In fact, the  
322  $NO_3^-$  stock was greater in the clayey silt than in loamy sand after incubation (Fig. 2). Thus, we suggest that the  
323 gas fluxes were unaffected by the change to anaerobic headspace in the clayey silt due to already low  $O_2$   
324 concentrations as a result of poor diffusivity. In conclusion, distinct gas diffusivities of both soils can be  
325 proposed as the main reason for the differing  $N_2O$  and  $N_2$  fluxes.

326 In interaction with soil diffusivity, also respiration affects the aerobicity of a soil matrix by concurrent  
327 consumption and formation of  $O_2$  and  $CO_2$ , respectively. Depending on microbial availability of carbon,  
328 respiration could be indicated approximately by DOC, though not all DOC might be readily degradable (Cook  
329 and Allan, 1992). Generally, the DOC contents after our incubation increased with application rate of BD (Table  
330 4), but the DOC contents were always smaller in the clayey silt. This might reflect a stronger sorption of C and  
331 thus a lower availability for respiration in the clayey silt compared to the loamy sand (Kaiser and Guggenberger,  
332 2000). If we compare the DOC values with the cumulated flux rates of  $CO_2$  over the period of aerobic  
333 headspace, we find a good regression fit ( $R^2 = 0.91$ ,  $p < 0.001$ ) for both soils (Fig. 6) indicating a sufficient  
334 availability of C from BD for respiration and, thus, implicitly also for denitrification (Reddy et al., 1982).  
335 Moreover, as increased DOC enhanced respiration (Table A1), it consequently affected  $O_2$  consumption and,  
336 thus, also the emergence of anaerobic microsites (Azam et al., 2002). Accordingly, there is also a good  
337 correlation between cumulated  $CO_2$  and  $N_2O + N_2$  fluxes for the same period from the clayey silt ( $R^2 = 0.93$ ,  $p =$   
338  $0.001$ ), when the treatments with 35 % WFPS (which showed virtually no N emissions) are omitted (Fig. 7).  
339 However, there was no such a correlation for the loamy sand. This confirms the interactive effect of diffusivity  
340 (induced by both the soils and WFPS) and C availability on the emissions of  $N_2O$  and  $N_2$ , which, nevertheless,  
341 interacted with the inhibitory effect of high  $NH_4^+$  loads on nitrification (see chapter 4.1).

## 342 5 Relevance and implications

343 Our aim was to estimate the effect of differing soil environmental conditions on gaseous N losses – and not to  
344 draw conclusions about the long-term dynamics of  $N_2$  and  $N_2O$  emissions after BD application in concentrations  
345 similar to injection. In another laboratory study at a WFPS of 65%, Senbayram et al. (2009) measured only one  
346 peak within two days without a repeated increase later, regardless the amount of applied BD. Thus, we assume a  
347 single peak shortly after application holds also true for our incubation as well. We assume also the measurements  
348 after only 24 hours of anaerobicity in the headspace as representative for the emission potential since Wang et al.  
349 (2011; 2013) showed in similar studies to ours that the emission of  $N_2$  and  $N_2O$  peaked within less than 24 hours  
350 after switching their headspace from aerobic to anaerobic conditions.

351 However, as hypothesised,  $N_2O$  and  $N_2$  emissions as well as the  $N_2/(N_2O+N_2)$  ratio increased with WFPS, most  
352 probably due to restricted supply of  $O_2$ . Contrary to our second hypothesis, the gaseous losses of  $N_2O$  and  $N_2$  did  
353 not increase with the application rate of BD. This indicates an inhibitory effect of high  $NH_3$  and  $NH_4^+$   
354 concentrations, respectively, on nitrification, which are found typically in biogas digestates (BD). Nevertheless,  
355 the  $N_2/(N_2O+N_2)$  ratio tended to decrease with application rate as supposed, probably due to a copious supply  
356 with  $NO_2^-$  and  $NO_3^-$  from oxidised  $BD-NH_4^+$ . Confirming our third hypothesis, the fine textured clayey silt  
357 induced **larger** gaseous N losses and a higher  $N_2/(N_2O+N_2)$  ratio than the coarse loamy sand by the apparent  
358 distinct diffusivities of both soils. Overall, there was a larger potential for formation of  $N_2O$  in the fine-textured  
359 clayey silt compared to the coarse loamy sand **after the application of high concentrations of BD as they may**  
360 **appear after** injection. However, the loamy sand showed a large potential for  $N_2$  formation under anaerobic  
361 headspace conditions. Nevertheless, further investigations are needed in regarding **the dynamics and** the duration  
362 of the observed effects and their reliability for field conditions.

## 363 Acknowledgements

364 We thank Karsten Kalbitz and three anonymous referees for their careful reading, critical comments and  
365 suggestions. We are very grateful to Heinrich Graf von Bassewitz and Matthias Haß from Gut Dalwitz for their  
366 straightforward support with substrate from their anaerobic digester. We thank Madlen Pohl from the ZALF,  
367 Institute for Landscape Biogeochemistry, Müncheberg, Germany, most sincerely for managing the laboratory  
368 analyses of the soil samples. The joint research project underlying this report was funded by the German Federal  
369 Ministry of Food and Agriculture under the funding identifier 22007910.

371 **References**

- 372 Anthonisen, A. C., Loehr, R. C., Prakasam, T. B. S., and Srinath, E. G.: Inhibition of Nitrification by Ammonia  
373 and Nitrous Acid, *Journal (Water Pollution Control Federation)*, 48, 835–852, 1976.
- 374 Azam, F., Müller, C., Weiske, A., Benckiser, G., and Ottow, J.: Nitrification and denitrification as sources of  
375 atmospheric nitrous oxide – role of oxidizable carbon and applied nitrogen, *Biology and Fertility of Soils*,  
376 35, 54–61, doi:10.1007/s00374-001-0441-5, 2002.
- 377 Balaine, N., Clough, T. J., Beare, M. H., Thomas, S. M., and Meenken, E. D.: Soil Gas Diffusivity Controls N<sub>2</sub>O  
378 and N<sub>2</sub> Emissions and their Ratio, *Soil Science Society of America Journal*, 80, 529–540,  
379 doi:10.2136/sssaj2015.09.0350, 2016.
- 380 Ball, B. C.: Soil structure and greenhouse gas emissions: a synthesis of 20 years of experimentation, *Eur J Soil  
381 Sci*, 64, 357–373, doi:10.1111/ejss.12013, 2013.
- 382 Blagodatsky, S. and Smith, P.: Soil physics meets soil biology: Towards better mechanistic prediction of  
383 greenhouse gas emissions from soil, *Soil Biology and Biochemistry*, 47, 78–92,  
384 doi:10.1016/j.soilbio.2011.12.015, 2012.
- 385 Butterbach-Bahl, K., Baggs, E. M., Dannenmann, M., Kiese, R., and Zechmeister-Boltenstern, S.: Nitrous oxide  
386 emissions from soils: how well do we understand the processes and their controls?, *Philosophical  
387 Transactions of the Royal Society of London B: Biological Sciences*, 368, doi:10.1098/rstb.2013.0122,  
388 2013.
- 389 Butterbach-Bahl, K., Willibald, G., and Papen, H.: Soil core method for direct simultaneous determination of N<sub>2</sub>  
390 and N<sub>2</sub>O emissions from forest soils, *Plant and Soil*, 240, 105–116, doi:10.1023/A:1015870518723, 2002.
- 391 Cameron, K. C., Di, H. J., and Moir, J. L.: Nitrogen losses from the soil/plant system: a review, *Ann Appl Biol*,  
392 162, 145–173, doi:10.1111/aab.12014, 2013.
- 393 Christensen, J. P. and Rowe, G. T.: Nitrification and oxygen consumption in northwest Atlantic deep-sea  
394 sediments, *Journal of Marine Research*, 42, 1099–1116, doi:10.1357/002224084788520828, 1984.
- 395 Cook, B. D. and Allan, D. L.: Dissolved organic carbon in old field soils: Total amounts as a measure of  
396 available resources for soil mineralization, *Soil Biology and Biochemistry*, 24, 585–594, doi:10.1016/0038-  
397 0717(92)90084-B, 1992.
- 398 Davidson, E. A. and Kanter, D.: Inventories and scenarios of nitrous oxide emissions, *Environmental Research  
399 Letters*, 9, 105012, 2014.
- 400 Davidson, E. A., Suddick, E. C., Rice, C. W., and Prokopy, L. S.: More Food, Low Pollution (Mo Fo Lo Po): A  
401 Grand Challenge for the 21st Century, *Journal of Environmental Quality*, 44, doi:10.2134/jeq2015.02.0078,  
402 2015.
- 403 Dell, C. J., Meisinger, J. J., and Beegle, D. B.: Subsurface Application of Manures Slurries for Conservation  
404 Tillage and Pasture Soils and Their Impact on the Nitrogen Balance, *Journal of Environmental Quality*, 40,  
405 doi:10.2134/jeq2010.0069, 2011.
- 406 Eickenscheidt, T., Heinichen, J., Augustin, J., Freibauer, A., and Drösler, M.: Nitrogen mineralization and  
407 gaseous nitrogen losses from waterlogged and drained organic soils in a black alder (*Alnus glutinosa* (L.)  
408 Gaertn.) forest, *Biogeosciences*, 11, 2961–2976, doi:10.5194/bg-11-2961-2014, 2014.

409 Emerson, K., Russo, R. C., Lund, R. E., and Thurston, R. V.: Aqueous Ammonia Equilibrium Calculations:  
410 Effect of pH and Temperature, *Journal of the Fisheries Research Board of Canada*, 32, 2379–2383,  
411 doi:10.1139/f75-274, 1975.

412 Firestone, M. K. and Davidson, E. A.: Microbiological basis of NO and N<sub>2</sub>O production and consumption in  
413 soil, in: *Exchange of Trace Gases Between Terrestrial Ecosystems and the Atmosphere*, Andreae, M. a. S. D.  
414 (Ed.), Wiley, Chichester, 7–21, 1989.

415 Friedl, J., Scheer, C., Rowlings, D. W., McIntosh, H. V., Strazzabosco, A., Warner, D. I., and Grace, P. R.:  
416 Denitrification losses from an intensively managed sub-tropical pasture – Impact of soil moisture on the  
417 partitioning of N<sub>2</sub> and N<sub>2</sub>O emissions, *Soil Biology and Biochemistry*, 92, 58–66,  
418 doi:10.1016/j.soilbio.2015.09.016, 2016.

419 Groffman, P. M. and Tiedje, J. M.: Relationships between denitrification, CO<sub>2</sub> production and air-filled porosity  
420 in soils of different texture and drainage, *Soil Biology and Biochemistry*, 23, 299–302, doi:10.1016/0038-  
421 0717(91)90067-T, 1991.

422 Gu, J., Nicoulaud, B., Rochette, P., Gossel, A., Hénault, C., Cellier, P., and Richard, G.: A regional experiment  
423 suggests that soil texture is a major control of N<sub>2</sub>O emissions from tile-drained winter wheat fields during  
424 the fertilization period, *Soil Biology and Biochemistry*, 60, 134–141, doi:10.1016/j.soilbio.2013.01.029,  
425 2013.

426 Jurasinski, G., Koebsch, F., and Hagemann, U.: flux: Flux rate calculation from dynamic closed chamber  
427 measurements, 2014.

428 Kaiser, E. A., Kohrs, K., Kucke, M., Schnug, E., Heinemeyer, O., and Munch, J. C.: Nitrous oxide release from  
429 arable soil: Importance of N-fertilization, crops and temporal variation, *Soil Biology and Biochemistry*, 30,  
430 1553–1563, doi:10.1016/S0038-0717(98)00036-4, 1998.

431 Kaiser, K. and Guggenberger, G.: The role of DOM sorption to mineral surfaces in the preservation of organic  
432 matter in soils, *Organic Geochemistry*, 31, 711–725, doi:10.1016/S0146-6380(00)00046-2, 2000.

433 Kissel, D. E., Cabrera, M. L., and Paramasivam, S.: Ammonium, Ammonia, and Urea Reactions in Soils, in:  
434 *Nitrogen in Agricultural Systems*, Agronomy Monographs, American Society of Agronomy, Crop Science  
435 Society of America, Soil Science Society of America, Madison, WI, 101–155, 2008.

436 Komsta, L. and Novomestky, F.: moments: Moments, cumulants, skewness, kurtosis and related tests, 2015.

437 Köster, J. R., Cárdenas, L., Senbayram, M., Bol, R., Well, R., Butler, M., Mühling, K. H., and Dittert, K.: Rapid  
438 shift from denitrification to nitrification in soil after biogas residue application as indicated by nitrous oxide  
439 isotopomers, *Soil Biology and Biochemistry*, 43, 1671–1677, doi:10.1016/j.soilbio.2011.04.004, 2011.

440 Köster, J. R., Cárdenas, L. M., Bol, R., Lewicka-Szczebak, D., Senbayram, M., Well, R., Giesemann, A., and  
441 Dittert, K.: Anaerobic digestates lower N<sub>2</sub>O emissions compared to cattle slurry by affecting rate and  
442 product stoichiometry of denitrification – An N<sub>2</sub>O isotopomer case study, *Soil Biology and Biochemistry*,  
443 84, 65–74, doi:10.1016/j.soilbio.2015.01.021, 2015.

444 Kuznetsova, A., Brockhoff, P. B., and Christensen, R. H. B.: lmerTest: Tests in Linear Mixed Effects Models,  
445 2016.



446 Letey, J., Jury, W. A., Hadas, A., and Valoras, N.: Gas Diffusion as a Factor in Laboratory Incubation Studies on  
447 Denitrification<sup>1</sup>, *Journal of Environmental Quality*, 9, doi:10.2134/jeq1980.00472425000900020012x,  
448 1980.

449 Maag, M. and Vinther, F. P.: Effect of temperature and water on gaseous emissions from soils treated with  
450 animal slurry, *Soil Science Society of America Journal*, 63, 858–865, 1999.

451 Möller, K. and Müller, T.: Effects of anaerobic digestion on digestate nutrient availability and crop growth: A  
452 review, *Eng. Life Sci.*, 12, 242–257, doi:10.1002/elsc.201100085, 2012.

453 Myhre, G., Shindell, D., Bréon, F. M., Collins, W., Fuglestedt, J., Huang, J., Koch, D., Lamarque, J. F., Lee,  
454 D., and Mendoza, B.: Anthropogenic and natural radiative forcing, in: *Climate Change 2013: The Physical  
455 Science Basis: Contribution of Working Group I to the Fifth Assessment Report of the Intergovernmental  
456 Panel on Climate Change*, Stocker, T. F., Qin, D., Plattner, G. K., Tignor, M., Allen, S. K., Boschung, J.,  
457 Nauels, A., Xia, Y., Bex, V., and Midgley, P. M. (Eds.), Cambridge University Press, Cambridge, United  
458 Kingdom, New York, NY, USA, 659–740, 2013.

459 Nkoa, R.: Agricultural benefits and environmental risks of soil fertilization with anaerobic digestates: a review,  
460 *Agron. Sustain. Dev.*, 1–20, doi:10.1007/s13593-013-0196-z, 2013.

461 Parkin, T. B. and Tiedje, J. M.: Application of a soil core method to investigate the effect of oxygen  
462 concentration on denitrification, *Soil Biology and Biochemistry*, 16, 331–334, doi:10.1016/0038-  
463 0717(84)90027-0, 1984.

464 Quakernack, R., Pacholski, A., Techow, A., Herrmann, A., Taube, F., and Kage, H.: Ammonia volatilization and  
465 yield response of energy crops after fertilization with biogas residues in a coastal marsh of Northern  
466 Germany, *Agriculture, Ecosystems & Environment*, 160, 66–74, doi:10.1016/j.agee.2011.05.030, 2012.

467 R Core Team: R: A Language and Environment for Statistical Computing, Vienna, Austria: [https://www.R-  
468 project.org/](https://www.R-project.org/), 2015.

469 Reddy, K. R., Rao, P. S. C., and Jessup, R. E.: The Effect of Carbon Mineralization on Denitrification Kinetics  
470 in Mineral and Organic Soils<sup>1</sup>, *Soil Science Society of America Journal*, 46, 62–68,  
471 doi:10.2136/sssaj1982.03615995004600010011x, 1982.

472 Scholefield, D., Hawkins, J. M. B., and Jackson, S. M.: Development of a helium atmosphere soil incubation  
473 technique for direct measurement of nitrous oxide and dinitrogen fluxes during denitrification, *Soil Biology  
474 and Biochemistry*, 29, 1345–1352, doi:10.1016/S0038-0717(97)00021-7, 1997.

475 Senbayram, M., Chen, R., Budai, A., Bakken, L., and Dittert, K.: N<sub>2</sub>O emission and the N<sub>2</sub>O/(N<sub>2</sub>O + N<sub>2</sub>)  
476 product ratio of denitrification as controlled by available carbon substrates and nitrate concentrations,  
477 *Agriculture, Ecosystems & Environment*, 147, 4–12, doi:10.1016/j.agee.2011.06.022, 2012.

478 Senbayram, M., Chen, R., Mühling, K. H., and Dittert, K.: Contribution of nitrification and denitrification to  
479 nitrous oxide emissions from soils after application of biogas waste and other fertilizers, *Rapid Commun.  
480 Mass Spectrom.*, 23, 2489–2498, doi:10.1002/rcm.4067, 2009.

481 Senbayram, M., Chen, R., Wienforth, B., Herrmann, A., Kage, H., Mühling, K. H., and Dittert, K.: Emission of  
482 N<sub>2</sub>O from Biogas Crop Production Systems in Northern Germany, *BioEnergy Research*, 1–14,  
483 doi:10.1007/s12155-014-9456-2, 2014.

484 Severin, M., Fuss, R., Well, R., Garlipp, F., and van den Weghe, H.: Soil, slurry and application effects on  
485 greenhouse gas emissions, *Plant, Soil and Environment*, 61, 344–351, 2015.

486 Tiedje, J. M.: Ecology of denitrification and dissimilatory nitrate reduction to ammonium, in: *Biology of*  
487 *anaerobic microorganisms*, Zehnder, A. J. B. (Ed.), John Wiley and Sons Inc, New York, 179–244, 1988.

488 Uchida, Y., Clough, T. J., Kelliher, F. M., and Sherlock, R. R.: Effects of aggregate size, soil compaction, and  
489 bovine urine on N<sub>2</sub>O emissions from a pasture soil, *Soil Biology and Biochemistry*, 40, 924–931,  
490 doi:10.1016/j.soilbio.2007.11.007, 2008.

491 Velthof, G. L. and Mosquera, J.: The impact of slurry application technique on nitrous oxide emission from  
492 agricultural soils, *Agriculture, Ecosystems & Environment*, 140, 298–308, doi:10.1016/j.agee.2010.12.017,  
493 2011.

494 Venterea, R. T., Clough, T. J., Coulter, J. A., Breuillin-Sessoms, F., Wang, P., and Sadowsky, M. J.: Ammonium  
495 sorption and ammonia inhibition of nitrite-oxidizing bacteria explain contrasting soil N<sub>2</sub>O production,  
496 *Scientific Reports*, 5, 12153 EP -, 2015.

497 Wang, R., Feng, Q., Liao, T., Zheng, X., Butterbach-Bahl, K., Zhang, W., and Jin, C.: Effects of nitrate  
498 concentration on the denitrification potential of a calcic cambisol and its fractions of N<sub>2</sub>, N<sub>2</sub>O and NO, *Plant*  
499 *and Soil*, 363, 175–189, doi:10.1007/s11104-012-1264-x, 2013.

500 Wang, R., Willibald, G., Feng, Q., Zheng, X., Liao, T., Brüggemann, N., and Butterbach-Bahl, K.: Measurement  
501 of N<sub>2</sub>, N<sub>2</sub>O, NO, and CO<sub>2</sub> Emissions from Soil with the Gas-Flow-Soil-Core Technique, *Environ. Sci.*  
502 *Technol.*, 45, 6066–6072, doi:10.1021/es1036578, 2011.

503 Webb, J., Pain, B., Bittman, S., and Morgan, J.: The impacts of manure application methods on emissions of  
504 ammonia, nitrous oxide and on crop response—A review, *Special section Harvested perennial grasslands:*  
505 *Ecological models for farming's perennial future*, 137, 39–46, doi:10.1016/j.agee.2010.01.001, 2010.

506 West, S. G., Finch, J. F., and Curran, P. J.: Structural equation models with nonnormal variables: Problems and  
507 remedies, in: *Structural equation modeling: Concepts, issues, and applications*, Hoyle, R. H. (Ed.), Sage,  
508 Thousand Oaks, 56–75, 1995.

509 Wulf, S., Maeting, M., and Clemens, J.: Application technique and slurry co-fermentation effects on ammonia,  
510 nitrous oxide, and methane emissions after spreading: II. Greenhouse gas emissions, *Journal of*  
511 *Environmental Quality*, 31, 1795–1801, 2002.

512 Zhang, X., Davidson, E. A., Mauzerall, D. L., Searchinger, T. D., Dumas, P., and Shen, Y.: Managing nitrogen  
513 for sustainable development, *NATURE*, 528, 51–59, 2015.

514

515 **Table 1: The examined factors soil texture, water-filled pore space (WFPS), and amount (i.e., concentration) of**  
516 **nitrogen (N) applied with biogas digestate (BD) with their respective levels applied in the present study, resulting in**  
517 **18 treatments with three replicates each. The temperature was manipulated consecutively during the incubation.**

| Factor [ <i>n</i> ]             | Levels     |             |     |
|---------------------------------|------------|-------------|-----|
| Soil texture [2]                | loamy sand | clayey silt |     |
| WFPS (%) [3]                    | 35         | 55          | 75  |
| BD-N (kg ha <sup>-1</sup> ) [3] | 0          | 160         | 320 |
| Temperature (°C) [2]            | 2          | 15          |     |

518

519 **Table 2: Characteristics of both soils. Texture and mean values with standard deviations (in brackets) for carbon (C,  $n = 9$ ), nitrogen (N,  $n = 9$ ), pH ( $n = 3$ ), bulk density (BD,  $n =$**   
 520 **3) and mineral N ( $\text{NO}_3^-$  and  $\text{NH}_4^+$ ,  $n = 3$ ) of both soils in 0–10 cm depth after field sampling.**

| Texture     | C ( $\text{mg g}^{-1}$ ) <sup>a</sup> | N ( $\text{mg g}^{-1}$ ) <sup>a</sup> | pH <sup>b</sup> | Bulk density ( $\text{g cm}^{-3}$ ) <sup>c</sup> | $\text{NO}_3^-$ ( $\text{mg kg}^{-1}$ ) <sup>d</sup> | $\text{NH}_4^+$ ( $\text{mg kg}^{-1}$ ) <sup>d</sup> |
|-------------|---------------------------------------|---------------------------------------|-----------------|--------------------------------------------------|------------------------------------------------------|------------------------------------------------------|
| Loamy sand  | 6.99 (0.29)                           | 0.67 (0.05)                           | 7.2 (0.1)       | 1.4 (0.0)                                        | 1.0 (0.2)                                            | 0.6 (0.3)                                            |
| Clayey silt | 10.77 (0.28)                          | 1.19 (0.06)                           | 7.2 (0.0)       | 1.5 (0.0)                                        | 1.8 (0.2)                                            | 0.3 (0.2)                                            |

521 <sup>a</sup> measured with analyser “Truspec CNS”, Leco Instruments GmbH, Germany, performed according to ISO 10694 (“elemental analysis”) for C and according to ISO

522 13878 (“elemental analysis”) for N

523 <sup>b</sup> measured in  $\text{H}_2\text{O}$  with TitraMaster85, Radiometer Analytical SAS, France, performed according to VDLUFA Methodenbuch, Vol. 1, chap. 5.1.1

524 <sup>c</sup> measured on 250  $\text{cm}^3$  soil cores

525 <sup>d</sup> measured with analyser “CFA-SAN”, Skalar Analytical B.V., the Netherlands, performed according to ISO 14256

526 **Table 3: Chronological order of the incubated factor combinations. Two different factor combinations with their**  
 527 **respective repetitions ( $n = 3$ ) were placed together for each weekly incubation course (cf. Fig. 1). The factors were**  
 528 **combined by (1) soil (loamy sand: LS, clayey silt: CS), (2) amount (kg) of applied N from digestate per ha and (3)**  
 529 **WFPS (%).**

| Week | Factor combination 1 | Factor combination 2 |
|------|----------------------|----------------------|
| 1    | LS - 0 N - 35%       | LS - 0 N - 55%       |
| 2    | LS - 0 N - 75%       | LS - 160 N - 35%     |
| 3    | LS - 160 N - 55%     | LS - 160 N - 75%     |
| 4    | LS - 320 N - 35%     | LS - 320 N - 55%     |
| 5    | LS - 320 N - 75%     | CS - 0 N - 35%       |
| 6    | CS - 0 N - 55%       | CS - 0 N - 75%       |
| 7    | CS - 160 N - 35%     | CS - 160 N - 55%     |
| 8    | CS - 160 N - 75%     | CS - 320 N - 35%     |
| 9    | CS - 320 N - 55%     | CS - 320 N - 75%     |

530

531 **Table 4: Mean DOC values from soils, measured after incubation with standard deviations in brackets for the**  
 532 **respective treatments differing in amount of applied biogas digestate (BD) and water-filled pore space (WFPS).**

| kg digestate-N ha <sup>-1</sup> | WFPS (%) | mg DOC (kg soil) <sup>-1</sup> |              |
|---------------------------------|----------|--------------------------------|--------------|
|                                 |          | Loamy sand                     | Clayey silt  |
| 0                               | 35       | 41.4 (2.7)                     | 18.9 (1.1)   |
|                                 | 55       | 38.6 (3.1)                     | 19.8 (1.4)   |
|                                 | 75       | 43.7 (1.4)                     | 19.0 (1.8)   |
| 160                             | 35       | 197.4 (20.7)                   | n.a.         |
|                                 | 55       | 190.5 (19.3)                   | 68.3 (12.7)  |
|                                 | 75       | 362.2 (40.0)                   | 63.2 (9.6)   |
| 320                             | 35       | 316.8 (25.3)                   | 358.1 (26.3) |
|                                 | 55       | 312.5 (14.3)                   | 94.8 (13.6)  |
|                                 | 75       | 500.1 (33.4)                   | 105.9 (14.8) |

533 n.a.: data not available

534 **Table 5: ANOVA table (type 2,  $p$ -values calculated based on Satterthwaite's approximation) of the linear mixed effects models for estimated fluxes of  $N_2$ ,  $N_2O$ ,  $N_2/(N_2+N_2O)$**   
 535 **product ratio and  $CO_2$  in aerobic He- $O_2$  atmosphere. Soil type, water-filled pore space (WFPS), amount of digestate, temperature,  $NO_3^-$  and DOC content of soil after incubation**  
 536 **as well as fluxes of  $N_2O$  and  $CO_2$  were set as possible independent variables. The individual soil rings were set as random effect (nested within the respective week and with the**  
 537 **allowance for varying slopes for each day of measurements). The random effect was always significant.**

538

| Response         | Fixed effects |         |                  |             |               |          |             |             |
|------------------|---------------|---------|------------------|-------------|---------------|----------|-------------|-------------|
|                  | Soil type     | WFPS    | Digestate amount | Temperature | $NO_3^-$ post | DOC post | $N_2O$ flux | $CO_2$ flux |
| $N_2$            | 0.026         | < 0.001 | 0.008            | 0.037       | †             | 0.001    | < 0.001     | †           |
| $N_2O$           | †             | < 0.001 | < 0.001          | < 0.001     | †             | < 0.001  | *           | < 0.001     |
| $N_2/(N_2+N_2O)$ | 0.005         | 0.004   | †                | †           | †             | †        | *           | †           |
| $CO_2$           | <0.001        | †       | <0.001           | <0.001      | †             | 0.007    | †           | *           |

539 † Variable eliminated during stepwise regression selection

540 \* Variable was not included into original regression

541 **Figure 1: Course of incubation and gas measurements with respect to atmosphere and temperature of the headspace**  
542 **after two days of pre-incubation at 2 °C in He/O<sub>2</sub> gas mixture. Gas concentrations of the headspace were determined**  
543 **on five consecutive days, i.e. Monday to Friday in the morning. After the first two measurement days, the headspace**  
544 **temperature was increased from 2 to 15 °C. Additionally, after the fourth measurement day, the aerobic**  
545 **Helium/oxygen gas mixture in the headspace was replaced by a pure Helium atmosphere.**

546



547 **Fig. 2: Ammonium and nitrate contents from loamy sand and clayey silt after incubation with different water-filled**  
548 **pore spaces (WFPS, %) and amounts of digestate (0 mL per sample ring: 'No BD', 17.6 mL: 'Low BD' and 35.2 mL:**  
549 **'High BD'). Error bars denote standard deviations. In general, the ammonium content increased with digestate**  
550 **application with lower amounts detected in the clayey silt. Nitrate was found almost exclusively in the latter soil. For**  
551 **comparison, calculated amounts of ammonium applied with biogas digestate are shown by triangles. One treatment**  
552 **(\*) was omitted from all analyses due to technical reasons.**

553

554 Fig. 3: Mean N<sub>2</sub>O fluxes (mg N m<sup>-2</sup> h<sup>-1</sup>) from a loamy sand and a clayey silt incubated under different water-filled pore  
555 spaces (WFPS, %) with different amounts of digestate (0 mL per sample ring: 'No BD', 17.6 mL: 'Low BD' and 35.2  
556 mL: 'High BD'). The first till the fourth day of the incubation were measured in an aerobic He-O<sub>2</sub> headspace (with  
557 two days at 2 °C followed by another two days at 15 °C) while on the fifth day measurements were conducted in an  
558 anaerobic headspace with pure He (at 15 °C). Error bars show standard deviations; if bars are not visible, they are  
559 smaller than the symbols of the means. Under aerobic atmosphere, N<sub>2</sub>O fluxes from loamy sand were negligible, while  
560 fluxes from clayey silt showed an increase with temperature, especially with higher WFPS and intermediate amounts  
561 of digestate. Under anaerobic atmosphere, mean fluxes from loamy sand increased slightly, but significantly (Tukey's  
562 HSD, *p* < 0.05). The fluxes from clayey silt showed no significant differences (Tukey's HSD, *p* < 0.05) compared to the  
563 day before, with the exception of 35% WFPS, where mean flux increased strongly in the treatment with 320 kg  
564 digestate-N ha<sup>-1</sup>.

565 Fig. 4: Mean N<sub>2</sub> fluxes (mg m<sup>-2</sup> h<sup>-1</sup>) from a loamy sand and a clayey silt incubated under different water-filled pore  
566 spaces (WFPS, %) with different amounts of digestate (0 mL per sample ring: 'No BD', 17.6 mL: 'Low BD' and 35.2  
567 mL: 'High BD'). The first till the fourth day of the incubation were measured in an aerobic He-O<sub>2</sub> headspace (with  
568 two days at 2 °C followed by another two days at 15 °C) while on the fifth day measurements were conducted in an  
569 anaerobic headspace with pure He (at 15 °C). Error bars show standard deviations; if bars are not visible, they are  
570 smaller than the symbols of the means. The dotted horizontal lines depict the average blank value; single flux rates  
571 lower than the respective blank value were set zero. Under aerobic atmosphere, N<sub>2</sub> fluxes from loamy sand were zero  
572 or rather negligible, while fluxes from clayey silt show a distinct increase with WFPS and higher fluxes at 15 °C.  
573 Under anaerobic atmosphere, mean fluxes from loamy sand increased by orders of magnitude, while the fluxes from  
574 clayey silt increased as well, but more gently compared to the sand.

575 **Fig. 5: Mean  $N_2/(N_2 + N_2O-N)$  product ratio from a loamy sand and a clayey silt incubated under different water-filled**  
576 **pore spaces (WFPS, %) with different amounts of digestate (0 mL per sample ring: 'No BD', 17.6 mL: 'Low BD' and**  
577 **35.2 mL: 'High BD'). The first till the fourth day of the incubation were measured in an aerobic He-O<sub>2</sub> headspace**  
578 **(with two days at 2 °C followed by another two days at 15 °C) while on the fifth day measurements were conducted**  
579 **in an anaerobic headspace with pure He (at 15 °C). Error bars show standard deviations; if bars are not visible, they**  
580 **are smaller than the symbols of the means. For the loamy sand, there was a clear distinction of the ratios between**  
581 **aerobic and anaerobic atmospheres: while the ratios tended to 0 in the former, they tended to 1 in the latter,**  
582 **irrespectively of temperature or amount of digestate. For the clayey silt, ratios increased with WFPS and were highest**  
583 **from the unamended treatments under both the aerobic and the anaerobic atmospheres.**

584 **Fig. 6: Regression between DOC (mg per 100 g soil) measured after the incubation and the respective cumulated CO<sub>2</sub>**  
585 **emissions (g C m<sup>-2</sup>) during the period of aerobic headspace with their standard deviations and confidence interval**  
586 **(95%). If error bars are not visible, they are smaller than the symbols of the means. Both soils showed increasing**  
587 **emissions with increasing soil DOC contents as well a good regression fit ( $R^2 = 0.91, p < 0.001$ ).**

588

589 **Fig. 7: Regression between cumulated CO<sub>2</sub> emissions (g C m<sup>-2</sup>) and the respective cumulated N<sub>2</sub>O + N<sub>2</sub> emissions (g N**  
590 **m<sup>-2</sup>) from the clayey silt with WFPS > 35 % during the period of aerobic headspace with their standard deviations**  
591 **and confidence interval (95%). If error bars are not visible, they are smaller than the symbols of the means. The**  
592 **proportional increase of CO<sub>2</sub> and the N gas species shows a good regression fit of  $R^2 = 0.93$ , ( $p = 0.001$ ).**

593 **Table A1: Mean CO<sub>2</sub>-C fluxes with standard deviations in mg m<sup>-2</sup> h<sup>-1</sup> from the loamy sand and the clayey silt, treated**  
594 **with different water-filled pore spaces (WFPS, %), amounts of digestate (kg N ha<sup>-1</sup>) as well as different temperature**  
595 **regimes (°C) under aerobic (He-O<sub>2</sub>) and anaerobic (He) atmosphere. Column 'Day' denotes the consecutive measuring**  
596 **days of the respective incubation cycle. Different letters after fluxes indicate significant differences (Tukey's HSD, *p* <**  
597 **0.05) within each soil and measuring day. Zeros as last digits were omitted.**

| Day | Atmosphere        | Temperature (°C) | WFPS (%) | kg N ha <sup>-1</sup> | mg CO <sub>2</sub> -C m <sup>-2</sup> h <sup>-1</sup> |                 |
|-----|-------------------|------------------|----------|-----------------------|-------------------------------------------------------|-----------------|
|     |                   |                  |          |                       | Loamy sand                                            | Clayey silt     |
| 1   | He-O <sub>2</sub> | 2                | 35       | 0                     | 6.8 ± 2.4 cd                                          | 0 ± 0 c         |
| 1   | He-O <sub>2</sub> | 2                | 35       | 160                   | 22 ± 3.5 bcd                                          | NA              |
| 1   | He-O <sub>2</sub> | 2                | 35       | 320                   | 23.3 ± 9.3 bc                                         | 22.8 ± 2.8 ab   |
| 1   | He-O <sub>2</sub> | 2                | 55       | 0                     | 6 ± 0.7 d                                             | 4.6 ± 7.9 bc    |
| 1   | He-O <sub>2</sub> | 2                | 55       | 160                   | 34.4 ± 3.1 b                                          | 34.5 ± 11.6 a   |
| 1   | He-O <sub>2</sub> | 2                | 55       | 320                   | 28 ± 3.2 b                                            | 15.9 ± 3.4 abc  |
| 1   | He-O <sub>2</sub> | 2                | 75       | 0                     | 9.4 ± 1.4 cd                                          | 0 ± 0 c         |
| 1   | He-O <sub>2</sub> | 2                | 75       | 160                   | 37.5 ± 6 b                                            | 15.5 ± 12.1 abc |
| 1   | He-O <sub>2</sub> | 2                | 75       | 320                   | 68.3 ± 12.1 a                                         | 24.5 ± 2.7 a    |
| 2   | He-O <sub>2</sub> | 2                | 35       | 0                     | 9.8 ± 3.5 c                                           | 1.3 ± 1.4 b     |
| 2   | He-O <sub>2</sub> | 2                | 35       | 160                   | 23 ± 3.9 bc                                           | NA              |
| 2   | He-O <sub>2</sub> | 2                | 35       | 320                   | 30.9 ± 2.2 b                                          | 22.2 ± 2.4 a    |
| 2   | He-O <sub>2</sub> | 2                | 55       | 0                     | 8.7 ± 1.5 c                                           | 0.6 ± 1 b       |
| 2   | He-O <sub>2</sub> | 2                | 55       | 160                   | 33.4 ± 0.9 b                                          | 27.6 ± 12.3 a   |
| 2   | He-O <sub>2</sub> | 2                | 55       | 320                   | 35.9 ± 2.7 b                                          | 14.4 ± 1.9 ab   |
| 2   | He-O <sub>2</sub> | 2                | 75       | 0                     | 8.3 ± 1.5 c                                           | 0 ± 0 b         |
| 2   | He-O <sub>2</sub> | 2                | 75       | 160                   | 31.9 ± 3 b                                            | 13 ± 9.3 ab     |
| 2   | He-O <sub>2</sub> | 2                | 75       | 320                   | 57.6 ± 14.8 a                                         | 18.3 ± 4 a      |
| 3   | He-O <sub>2</sub> | 15               | 35       | 0                     | 42.5 ± 4.5 c                                          | 6.7 ± 0.7 b     |
| 3   | He-O <sub>2</sub> | 15               | 35       | 160                   | 114.3 ± 12.2 b                                        | NA              |
| 3   | He-O <sub>2</sub> | 15               | 35       | 320                   | 149.5 ± 9.4 b                                         | 130.9 ± 105 a   |
| 3   | He-O <sub>2</sub> | 15               | 55       | 0                     | 41.3 ± 3.5 c                                          | 3.2 ± 0.4 b     |
| 3   | He-O <sub>2</sub> | 15               | 55       | 160                   | 108.7 ± 10.1 b                                        | 57.8 ± 12.2 bc  |
| 3   | He-O <sub>2</sub> | 15               | 55       | 320                   | 162.1 ± 9.6 b                                         | 26.8 ± 0.7 bc   |
| 3   | He-O <sub>2</sub> | 15               | 75       | 0                     | 44.1 ± 9.8 c                                          | 3.2 ± 0.7 b     |
| 3   | He-O <sub>2</sub> | 15               | 75       | 160                   | 150.4 ± 19 b                                          | 26.4 ± 11.8 bc  |
| 3   | He-O <sub>2</sub> | 15               | 75       | 320                   | 249.7 ± 53.5 a                                        | 35.3 ± 6 bc     |
| 4   | He-O <sub>2</sub> | 15               | 35       | 0                     | 48.7 ± 6 c                                            | 15.1 ± 4.9 cd   |
| 4   | He-O <sub>2</sub> | 15               | 35       | 160                   | 114.3 ± 6.4 b                                         | NA              |
| 4   | He-O <sub>2</sub> | 15               | 35       | 320                   | 156.9 ± 15.4 a                                        | 65.7 ± 2.2 a    |
| 4   | He-O <sub>2</sub> | 15               | 55       | 0                     | 48 ± 3.4 c                                            | 4.2 ± 0.2 d     |
| 4   | He-O <sub>2</sub> | 15               | 55       | 160                   | 109 ± 14.4 b                                          | 51.2 ± 15.1 ab  |
| 4   | He-O <sub>2</sub> | 15               | 55       | 320                   | 177.7 ± 7.5 a                                         | 26.6 ± 2.3 cd   |

|   |                   |    |    |     |                |                |
|---|-------------------|----|----|-----|----------------|----------------|
| 4 | He-O <sub>2</sub> | 15 | 75 | 0   | 34 ± 7.8 c     | 6.7 ± 4 d      |
| 4 | He-O <sub>2</sub> | 15 | 75 | 160 | 168.7 ± 0.4 a  | 22.1 ± 14.8 cd |
| 4 | He-O <sub>2</sub> | 15 | 75 | 320 | 166.3 ± 23.1 a | 34.1 ± 5.7 bc  |
| 5 | He                | 15 | 35 | 0   | 11.2 ± 0.6 d   | NA             |
| 5 | He                | 15 | 35 | 160 | 54.8 ± 9.3 c   | NA             |
| 5 | He                | 15 | 35 | 320 | 149.3 ± 3.9 a  | 45.8 ± 2.1 a   |
| 5 | He                | 15 | 55 | 0   | 13.6 ± 1.9 d   | 3.4 ± 0.6 c    |
| 5 | He                | 15 | 55 | 160 | 55.2 ± 4.4 bc  | 32 ± 11.4 ab   |
| 5 | He                | 15 | 55 | 320 | 164.5 ± 3.5 a  | 15.2 ± 10.7 bc |
| 5 | He                | 15 | 75 | 0   | 20.9 ± 2.3 d   | 3.6 ± 0.1 c    |
| 5 | He                | 15 | 75 | 160 | 75 ± 7.3 b     | 20.6 ± 8.5 bc  |
| 5 | He                | 15 | 75 | 320 | NA             | 26.1 ± 2.6 ab  |

598



599 **Table A2: Mean N<sub>2</sub>O-N fluxes with standard deviations in mg m<sup>-2</sup> h<sup>-1</sup> from the loamy sand and the clayey silt, treated**  
600 **with different water-filled pore spaces (WFPS, %), amounts of digestate (kg N ha<sup>-1</sup>) as well as different temperature**  
601 **regimes (°C) under aerobic (He-O<sub>2</sub>) and anaerobic (He) atmosphere. Column 'Day' denotes the consecutive measuring**  
602 **days of the respective incubation cycle. Different letters after fluxes indicate significant differences (Tukey's HSD, *p* <**  
603 **0.05) within each soil and measuring day. Zeros as last digits were omitted.**

| Day | Atmosphere        | Temperature<br>(°C) | WFPS (%) | kg N ha <sup>-1</sup> | mg N <sub>2</sub> O-N m <sup>-2</sup> h <sup>-1</sup> |              |
|-----|-------------------|---------------------|----------|-----------------------|-------------------------------------------------------|--------------|
|     |                   |                     |          |                       | Loamy sand                                            | Clayey silt  |
| 1   | He-O <sub>2</sub> | 2                   | 35       | 0                     | 0 ± 0                                                 | 0 ± 0 c      |
| 1   | He-O <sub>2</sub> | 2                   | 35       | 160                   | 0 ± 0                                                 | NA           |
| 1   | He-O <sub>2</sub> | 2                   | 35       | 320                   | 0 ± 0                                                 | 0 ± 0 c      |
| 1   | He-O <sub>2</sub> | 2                   | 55       | 0                     | 0 ± 0                                                 | 0.3 ± 0.1 c  |
| 1   | He-O <sub>2</sub> | 2                   | 55       | 160                   | 0 ± 0                                                 | 1.7 ± 0.4 a  |
| 1   | He-O <sub>2</sub> | 2                   | 55       | 320                   | 0 ± 0                                                 | 1.1 ± 0.1 b  |
| 1   | He-O <sub>2</sub> | 2                   | 75       | 0                     | 0 ± 0                                                 | 0.4 ± 0.1 c  |
| 1   | He-O <sub>2</sub> | 2                   | 75       | 160                   | 0 ± 0                                                 | 1 ± 0.1 b    |
| 1   | He-O <sub>2</sub> | 2                   | 75       | 320                   | 0 ± 0                                                 | 1 ± 0.2 b    |
| 2   | He-O <sub>2</sub> | 2                   | 35       | 0                     | 0 ± 0                                                 | 0 ± 0 d      |
| 2   | He-O <sub>2</sub> | 2                   | 35       | 160                   | 0 ± 0                                                 | NA           |
| 2   | He-O <sub>2</sub> | 2                   | 35       | 320                   | 0 ± 0                                                 | 0 ± 0 cd     |
| 2   | He-O <sub>2</sub> | 2                   | 55       | 0                     | 0 ± 0                                                 | 0.3 ± 0.1 bc |
| 2   | He-O <sub>2</sub> | 2                   | 55       | 160                   | 0 ± 0                                                 | 1.5 ± 0.6 a  |
| 2   | He-O <sub>2</sub> | 2                   | 55       | 320                   | 0 ± 0                                                 | 1.2 ± 0.2 a  |
| 2   | He-O <sub>2</sub> | 2                   | 75       | 0                     | 0 ± 0                                                 | 0.4 ± 0.1 bc |
| 2   | He-O <sub>2</sub> | 2                   | 75       | 160                   | 0 ± 0                                                 | 1 ± 0.1 ab   |
| 2   | He-O <sub>2</sub> | 2                   | 75       | 320                   | 0 ± 0                                                 | 1.1 ± 0.2 a  |
| 3   | He-O <sub>2</sub> | 15                  | 35       | 0                     | 0 ± 0 cd                                              | 0 ± 0 c      |
| 3   | He-O <sub>2</sub> | 15                  | 35       | 160                   | 0 ± 0 abc                                             | NA           |
| 3   | He-O <sub>2</sub> | 15                  | 35       | 320                   | 0 ± 0 ab                                              | 0 ± 0 c      |
| 3   | He-O <sub>2</sub> | 15                  | 55       | 0                     | 0 ± 0 bcd                                             | 0.8 ± 0.2 c  |
| 3   | He-O <sub>2</sub> | 15                  | 55       | 160                   | 0 ± 0 bcd                                             | 7.1 ± 0.9 a  |
| 3   | He-O <sub>2</sub> | 15                  | 55       | 320                   | 0 ± 0 a                                               | 3.5 ± 0.7 b  |
| 3   | He-O <sub>2</sub> | 15                  | 75       | 0                     | 0 ± 0 ab                                              | 0.8 ± 0.2 c  |
| 3   | He-O <sub>2</sub> | 15                  | 75       | 160                   | 0 ± 0 d                                               | 3.2 ± 0.7 b  |
| 3   | He-O <sub>2</sub> | 15                  | 75       | 320                   | 0 ± 0 cd                                              | 3 ± 0.9 b    |
| 4   | He-O <sub>2</sub> | 15                  | 35       | 0                     | 0 ± 0 b                                               | 0 ± 0 c      |
| 4   | He-O <sub>2</sub> | 15                  | 35       | 160                   | 0 ± 0 ab                                              | NA           |
| 4   | He-O <sub>2</sub> | 15                  | 35       | 320                   | 0 ± 0 ab                                              | 0.1 ± 0.1 c  |
| 4   | He-O <sub>2</sub> | 15                  | 55       | 0                     | 0 ± 0 b                                               | 1 ± 0.2 bc   |
| 4   | He-O <sub>2</sub> | 15                  | 55       | 160                   | 0.1 ± 0.1 a                                           | 6.2 ± 1.1 a  |
| 4   | He-O <sub>2</sub> | 15                  | 55       | 320                   | 0 ± 0 ab                                              | 3 ± 0.8 b    |

|   |                   |    |    |     |           |              |
|---|-------------------|----|----|-----|-----------|--------------|
| 4 | He-O <sub>2</sub> | 15 | 75 | 0   | 0 ± 0 ab  | 1.1 ± 0.3 bc |
| 4 | He-O <sub>2</sub> | 15 | 75 | 160 | 0 ± 0 b   | 2.6 ± 1 b    |
| 4 | He-O <sub>2</sub> | 15 | 75 | 320 | 0 ± 0 b   | 2.2 ± 0.9 b  |
| 5 | He                | 15 | 35 | 0   | 0.1 ± 0   | NA           |
| 5 | He                | 15 | 35 | 160 | NA        | NA           |
| 5 | He                | 15 | 35 | 320 | 0.9 ± 0.1 | 11.7 ± 2 a   |
| 5 | He                | 15 | 55 | 0   | 0.1 ± 0   | 0.1 ± 0 c    |
| 5 | He                | 15 | 55 | 160 | NA        | 5 ± 1 b      |
| 5 | He                | 15 | 55 | 320 | 1.2 ± 0.7 | 1.4 ± 0.8 c  |
| 5 | He                | 15 | 75 | 0   | 1.3 ± 1.6 | 0.1 ± 0 c    |
| 5 | He                | 15 | 75 | 160 | NA        | 1.7 ± 0.3 c  |
| 5 | He                | 15 | 75 | 320 | NA        | 1 ± 0.3 c    |

604

605 **Table A3: Mean N<sub>2</sub> fluxes with standard deviations in mg m<sup>-2</sup> h<sup>-1</sup> from the loamy sand and the clayey silt, treated with**  
606 **different water-filled pore spaces (WFPS, %), amounts of digestate (kg N ha<sup>-1</sup>) as well as different temperature**  
607 **regimes (°C) under aerobic (He-O<sub>2</sub>) and anaerobic (He) atmosphere. Column 'Day' denotes the consecutive measuring**  
608 **days of the respective incubation cycle. Different letters after fluxes indicate significant differences (Tukey's HSD, *p* <**  
609 **0.05) within each soil and measuring day. Zeros as last digits were omitted.**

|   | Atmosphere        | Temperature<br>(°C) | WFPS (%) | kg N ha <sup>-1</sup> | mg N <sub>2</sub> m <sup>-2</sup> h <sup>-1</sup> |              |
|---|-------------------|---------------------|----------|-----------------------|---------------------------------------------------|--------------|
|   |                   |                     |          |                       | Loamy sand                                        | Clayey silt  |
| 1 | He-O <sub>2</sub> | 2                   | 35       | 0                     | 0 ± 0                                             | 0 ± 0 bc     |
| 1 | He-O <sub>2</sub> | 2                   | 35       | 160                   | 0 ± 0                                             | NA           |
| 1 | He-O <sub>2</sub> | 2                   | 35       | 320                   | 0 ± 0                                             | 0.1 ± 0.1 bc |
| 1 | He-O <sub>2</sub> | 2                   | 55       | 0                     | 0 ± 0                                             | 1.5 ± 0.3 a  |
| 1 | He-O <sub>2</sub> | 2                   | 55       | 160                   | 0 ± 0                                             | 1.5 ± 0.3 a  |
| 1 | He-O <sub>2</sub> | 2                   | 55       | 320                   | 0 ± 0                                             | 1.5 ± 0 a    |
| 1 | He-O <sub>2</sub> | 2                   | 75       | 0                     | 0 ± 0                                             | 1.2 ± 1.1 a  |
| 1 | He-O <sub>2</sub> | 2                   | 75       | 160                   | 0 ± 0                                             | 1.5 ± 0.2 a  |
| 1 | He-O <sub>2</sub> | 2                   | 75       | 320                   | 0 ± 0                                             | 1.7 ± 0.4 a  |
| 2 | He-O <sub>2</sub> | 2                   | 35       | 0                     | 0 ± 0                                             | 0 ± 0 c      |
| 2 | He-O <sub>2</sub> | 2                   | 35       | 160                   | 0 ± 0                                             | NA           |
| 2 | He-O <sub>2</sub> | 2                   | 35       | 320                   | 0 ± 0                                             | 0 ± 0 c      |
| 2 | He-O <sub>2</sub> | 2                   | 55       | 0                     | 0 ± 0                                             | 1.3 ± 0.1 a  |
| 2 | He-O <sub>2</sub> | 2                   | 55       | 160                   | 0 ± 0                                             | 0.8 ± 0.5 b  |
| 2 | He-O <sub>2</sub> | 2                   | 55       | 320                   | 0 ± 0                                             | 1.3 ± 0.3 a  |
| 2 | He-O <sub>2</sub> | 2                   | 75       | 0                     | 0 ± 0                                             | 1.4 ± 0.4 a  |
| 2 | He-O <sub>2</sub> | 2                   | 75       | 160                   | 0 ± 0                                             | 1.4 ± 0.5 a  |
| 2 | He-O <sub>2</sub> | 2                   | 75       | 320                   | 0 ± 0                                             | 1.4 ± 0.1 a  |
| 3 | He-O <sub>2</sub> | 15                  | 35       | 0                     | 0 ± 0 b                                           | 0 ± 0 e      |
| 3 | He-O <sub>2</sub> | 15                  | 35       | 160                   | 0 ± 0 b                                           | NA           |
| 3 | He-O <sub>2</sub> | 15                  | 35       | 320                   | 0.1 ± 0.1 ab                                      | 0 ± 0 e      |
| 3 | He-O <sub>2</sub> | 15                  | 55       | 0                     | 0 ± 0 b                                           | 1.8 ± 0.3 cd |
| 3 | He-O <sub>2</sub> | 15                  | 55       | 160                   | 0 ± 0 b                                           | 2.3 ± 0.4 bc |
| 3 | He-O <sub>2</sub> | 15                  | 55       | 320                   | 0 ± 0 b                                           | 2.5 ± 0.2 ab |
| 3 | He-O <sub>2</sub> | 15                  | 75       | 0                     | 0.2 ± 0.3 a                                       | 1.5 ± 0.2 d  |
| 3 | He-O <sub>2</sub> | 15                  | 75       | 160                   | 0 ± 0 b                                           | 3 ± 0.9 a    |
| 3 | He-O <sub>2</sub> | 15                  | 75       | 320                   | 0 ± 0 b                                           | 2.6 ± 0.8 ab |
| 4 | He-O <sub>2</sub> | 15                  | 35       | 0                     | 0 ± 0 b                                           | 0 ± 0 c      |
| 4 | He-O <sub>2</sub> | 15                  | 35       | 160                   | 0.1 ± 0.2 b                                       | NA           |
| 4 | He-O <sub>2</sub> | 15                  | 35       | 320                   | 0 ± 0 b                                           | 0 ± 0 c      |
| 4 | He-O <sub>2</sub> | 15                  | 55       | 0                     | 0.1 ± 0.1 b                                       | 1.5 ± 0.2 b  |
| 4 | He-O <sub>2</sub> | 15                  | 55       | 160                   | 0 ± 0 b                                           | 2.9 ± 0.6 a  |
| 4 | He-O <sub>2</sub> | 15                  | 55       | 320                   | 0.5 ± 0.4 a                                       | 2.8 ± 0.7 a  |

|   |                   |    |    |     |              |              |
|---|-------------------|----|----|-----|--------------|--------------|
| 4 | He-O <sub>2</sub> | 15 | 75 | 0   | 0 ± 0 b      | 1.3 ± 0.2 bc |
| 4 | He-O <sub>2</sub> | 15 | 75 | 160 | 0 ± 0 b      | 3.8 ± 1.6 a  |
| 4 | He-O <sub>2</sub> | 15 | 75 | 320 | 0 ± 0 b      | 3.3 ± 0.8 a  |
| 5 | He                | 15 | 35 | 0   | 3.3 ± 0.4 d  | 0 ± 0 c      |
| 5 | He                | 15 | 35 | 160 | NA           | NA           |
| 5 | He                | 15 | 35 | 320 | 22.9 ± 5.7 b | 1.8 ± 0.1 c  |
| 5 | He                | 15 | 55 | 0   | 6 ± 2.2 cd   | 1.8 ± 0.2    |
| 5 | He                | 15 | 55 | 160 | NA           | 9.5 ± 2.7 a  |
| 5 | He                | 15 | 55 | 320 | 35.1 ± 8.6 a | 5.1 ± 1.8 bc |
| 5 | He                | 15 | 75 | 0   | 9.2 ± 0.4 c  | 1.9 ± 0.1 c  |
| 5 | He                | 15 | 75 | 160 | NA           | 4.8 ± 1.6 bc |
| 5 | He                | 15 | 75 | 320 | 26.8 ± 1.1 b | 6.7 ± 0.8 b  |

611
